# Supplementary material for: Empirical evidence of study design biases in nutrition randomised controlled trials: a meta-epidemiological study
Source: Springer Nature journal article supplement (doi:10.1186/s12916-022-02540-9), 2022-10-11
Supplement: MOESM2 [file 23591500]

## **ADDITIONAL FILE 2**

### **Empirical evidence of study design biases in nutrition randomised controlled trials: a meta-epidemiological study**

Julia Stadelmaier<sup>1</sup>, Isabelle Roux<sup>1</sup>, Maria Petropoulou<sup>2</sup>, Lukas Schwingshackl<sup>1</sup>

<sup>1</sup> Institute for Evidence in Medicine, Medical Centre - University of Freiburg, Faculty of Medicine, University of Freiburg, Freiburg, Germany.

<sup>2</sup> Institute of Medical Biometry and Statistics, Faculty of Medicine and Medical Centre - University of Freiburg, Freiburg, Germany.

Corresponding author: Julia Stadelmaier, MSc  
Breisacher Straße 86, 79110 Freiburg, Germany  
M: stadelmaier@ifem.uni-freiburg.de  
T: +49 (0)761 203-67957  
ORCID number: 0000-0002-8229-6305

## Content

|                                                                                                                                                                                                                                                                                                                                                                  |    |
|------------------------------------------------------------------------------------------------------------------------------------------------------------------------------------------------------------------------------------------------------------------------------------------------------------------------------------------------------------------|----|
| <b>Figure S1:</b> Example of calculating effect estimates for randomised controlled trials at low risk of bias and unclear/high risk of bias; domain: random sequence.....                                                                                                                                                                                       | 7  |
| <b>Figure S2:</b> Random sequence: Comparisons of randomised controlled trials with high/unclear risk of bias versus those with low risk of bias (reference category) for binary outcomes as pooled ratio of risk ratios .....                                                                                                                                   | 8  |
| <b>Figure S3:</b> Random sequence: Comparisons of randomised controlled trials with high/unclear risk of bias versus those with low risk of bias (reference category) for binary outcomes as pooled ratio of risk ratios. Sensitivity analysis: Excluding highly correlated outcomes .....                                                                       | 9  |
| <b>Figure S4:</b> Random sequence: Comparisons of randomised controlled trials with high/unclear risk of bias versus those with low risk of bias (reference category) for binary outcomes as pooled ratio of risk ratios. Sensitivity analysis: Including only one outcome per comparison from each included systematic review .....                             | 9  |
| <b>Figure S5:</b> Random sequence: Comparisons of randomised controlled trials with high/unclear risk of bias versus those with low risk of bias (reference category) for binary outcomes as pooled ratio of risk ratios. Subgroup analysis: Clusters of interventions .....                                                                                     | 10 |
| <b>Figure S6:</b> Random sequence: Comparisons of randomised controlled trials with high/unclear risk of bias versus those with low risk of bias (reference category) for binary outcomes as pooled ratio of risk ratios. Subgroup analysis: Clusters of outcomes .....                                                                                          | 11 |
| <b>Figure S7:</b> Random sequence: Comparisons of randomised controlled trials with high/unclear risk of bias versus those with low risk of bias (reference category) for binary outcomes as pooled ratio of risk ratios. Subgroup analysis: Subjective versus objective outcomes.....                                                                           | 12 |
| <b>Figure S8:</b> Random sequence: Comparisons of randomised controlled trials with high/unclear risk of bias versus those with low risk of bias (reference category) for continuous outcomes as pooled difference of standardised mean difference.....                                                                                                          | 13 |
| <b>Figure S9:</b> Random sequence: Comparisons of randomised controlled trials with high/unclear risk of bias versus those with low risk of bias (reference category) for continuous outcomes as pooled difference of standardised mean differences. Sensitivity analysis: Excluding highly correlated outcomes.....                                             | 14 |
| <b>Figure S10:</b> Random sequence: Comparisons of randomised controlled trials with high/unclear risk of bias versus those with low risk of bias (reference category) for continuous outcomes as pooled difference of standardised mean differences. Sensitivity analysis: Including only one outcome per comparison from each included systematic review ..... | 14 |
| <b>Figure S11:</b> Allocation concealment: Comparisons of randomised controlled trials with high/unclear risk of bias versus those with low risk of bias (reference category) for binary outcomes as pooled ratio of risk ratios.....                                                                                                                            | 15 |
| <b>Figure S12:</b> Allocation concealment: Comparisons of randomised controlled trials with high/unclear risk of bias versus those with low risk of bias (reference category) for binary outcomes as pooled ratio of risk ratios. Sensitivity analysis: Excluding highly correlated outcomes .....                                                               | 16 |
| <b>Figure S13:</b> Allocation concealment: Comparisons of randomised controlled trials with high/unclear risk of bias versus those with low risk of bias (reference category) for binary outcomes as pooled ratio of risk ratios. Sensitivity analysis: Including only one outcome per comparison from each included systematic review .....                     | 17 |
| <b>Figure S14:</b> Allocation concealment: Comparisons of randomised controlled trials with high/unclear risk of bias versus those with low risk of bias (reference category) for binary outcomes as pooled ratio of risk ratios. Subgroup analysis: Clusters of interventions .....                                                                             | 18 |

|                                                                                                                                                                                                                                                                                                                                                                                         |    |
|-----------------------------------------------------------------------------------------------------------------------------------------------------------------------------------------------------------------------------------------------------------------------------------------------------------------------------------------------------------------------------------------|----|
| <b>Figure S15:</b> Allocation concealment: Comparisons of randomised controlled trials with high/unclear risk of bias versus those with low risk of bias (reference category) for binary outcomes as pooled ratio of risk ratios. Subgroup analysis: Clusters of outcomes.....                                                                                                          | 19 |
| <b>Figure S16:</b> Allocation concealment: Comparisons of randomised controlled trials with high/unclear risk of bias versus those with low risk of bias (reference category) for binary outcomes as pooled ratio of risk ratios. Subgroup analysis: Subjective versus objective outcomes .....                                                                                         | 20 |
| <b>Figure S17:</b> Allocation concealment: Comparisons of randomised controlled trials with high/unclear risk of bias versus those with low risk of bias (reference category) for continuous outcomes as pooled difference of standardised mean differences .....                                                                                                                       | 21 |
| <b>Figure S18:</b> Allocation concealment: Comparisons of randomised controlled trials with high/unclear risk of bias versus those with low risk of bias (reference category) for continuous outcomes as pooled difference of standardised mean differences. Sensitivity analysis: Excluding highly correlated outcomes.....                                                            | 22 |
| <b>Figure S19:</b> Allocation concealment: Comparisons of randomised controlled trials with high/unclear risk of bias versus those with low risk of bias (reference category) for continuous outcomes as pooled difference of standardised mean differences. Sensitivity analysis: Including only one outcome per comparison from each included systematic review .....                 | 22 |
| <b>Figure S20:</b> Blinding of participants and personnel: Comparisons of randomised controlled trials with high/unclear risk of bias versus those with low risk of bias (reference category) for binary outcomes as pooled ratio of risk ratios.....                                                                                                                                   | 23 |
| <b>Figure S21:</b> Blinding of participants and personnel: Comparisons of randomised controlled trials with high/unclear risk of bias versus those with low risk of bias (reference category) for binary outcomes as pooled ratio of risk ratios. Sensitivity analysis: Excluding highly correlated outcomes.....                                                                       | 24 |
| <b>Figure S22:</b> Blinding of participants and personnel: Comparisons of randomised controlled trials with high/unclear risk of bias versus those with low risk of bias (reference category) for binary outcomes as pooled ratio of risk ratios. Sensitivity analysis: Including only one outcome per comparison from each included systematic review .....                            | 24 |
| <b>Figure S23:</b> Blinding of participants and personnel: Comparisons of randomised controlled trials with high/unclear risk of bias versus those with low risk of bias (reference category) for binary outcomes as pooled ratio of risk ratios. Subgroup analysis: Clusters of interventions .....                                                                                    | 25 |
| <b>Figure S24:</b> Blinding of participants and personnel: Comparisons of randomised controlled trials with high/unclear risk of bias versus those with low risk of bias (reference category) for binary outcomes as pooled ratio of risk ratios. Subgroup analysis: Subjective versus objective outcomes .....                                                                         | 26 |
| <b>Figure S25:</b> Blinding of participants and personnel: Comparisons of randomised controlled trials with high/unclear risk of bias versus those with low risk of bias (reference category) for binary outcomes as pooled ratio of risk ratios. Subgroup analysis: Clusters of outcomes .....                                                                                         | 27 |
| <b>Figure S26:</b> Blinding of participants and personnel: Comparisons of randomised controlled trials with high/unclear risk of bias versus those with low risk of bias (reference category) for continuous outcomes as pooled difference of standardised mean differences.....                                                                                                        | 28 |
| <b>Figure S27:</b> Blinding of participants and personnel: Comparisons of randomised controlled trials with high/unclear risk of bias versus those with low risk of bias (reference category) for continuous outcomes as pooled difference of standardised mean differences. Sensitivity analysis: Excluding highly correlated outcomes .....                                           | 29 |
| <b>Figure S28:</b> Blinding of participants and personnel: Comparisons of randomised controlled trials with high/unclear risk of bias versus those with low risk of bias (reference category) for continuous outcomes as pooled difference of standardised mean differences. Sensitivity analysis: Including only one outcome per comparison from each included systematic review ..... | 29 |

|                                                                                                                                                                                                                                                                                                                                                                                 |    |
|---------------------------------------------------------------------------------------------------------------------------------------------------------------------------------------------------------------------------------------------------------------------------------------------------------------------------------------------------------------------------------|----|
| <b>Figure S29:</b> Blinding of outcome assessment: Comparisons of randomised controlled trials with high/unclear risk of bias versus those with low risk of bias (reference category) for binary outcomes as pooled ratio of risk ratios.....                                                                                                                                   | 30 |
| <b>Figure S30:</b> Blinding of outcome assessment: Comparisons of randomised controlled trials with high/unclear risk of bias versus those with low risk of bias (reference category) for binary outcomes as pooled ratio of risk ratios. Sensitivity analysis: Excluding highly correlated outcomes .....                                                                      | 31 |
| <b>Figure S31:</b> Blinding of outcome assessment: Comparisons of randomised controlled trials with high/unclear risk of bias versus those with low risk of bias (reference category) for binary outcomes as pooled ratio of risk ratios. Sensitivity analysis: Including only one outcome per comparison from each included systematic review .....                            | 31 |
| <b>Figure S32:</b> Blinding of outcome assessment: Comparisons of randomised controlled trials with high/unclear risk of bias versus those with low risk of bias (reference category) for binary outcomes as pooled ratio of risk ratios. Subgroup analysis: Clusters of interventions .....                                                                                    | 32 |
| <b>Figure S33:</b> Blinding of outcome assessment: Comparisons of randomised controlled trials with high/unclear risk of bias versus those with low risk of bias (reference category) for binary outcomes as pooled ratio of risk ratios. Subgroup analysis: Clusters of outcomes .....                                                                                         | 33 |
| <b>Figure S34:</b> Blinding of outcome assessment: Comparisons of randomised controlled trials with high/unclear risk of bias versus those with low risk of bias (reference category) for binary outcomes as pooled ratio of risk ratios. Subgroup analysis: Subjective versus objective outcomes .....                                                                         | 34 |
| <b>Figure S35:</b> Blinding of outcome assessment: Comparisons of randomised controlled trials with high/unclear risk of bias versus those with low risk of bias (reference category) for continuous outcomes as pooled difference of standardised mean differences .....                                                                                                       | 35 |
| <b>Figure S36:</b> Blinding of outcome assessment: Comparisons of randomised controlled trials with high/unclear risk of bias versus those with low risk of bias (reference category) for continuous outcomes as pooled difference of standardised mean differences. Sensitivity analysis: Excluding highly correlated outcomes .....                                           | 36 |
| <b>Figure S37:</b> Blinding of outcome assessment: Comparisons of randomised controlled trials with high/unclear risk of bias versus those with low risk of bias (reference category) for continuous outcomes as pooled difference of standardised mean differences. Sensitivity analysis: Including only one outcome per comparison from each included systematic review ..... | 36 |
| <b>Figure S38:</b> Incomplete outcome data: Comparisons of randomised controlled trials with high/unclear risk of bias versus those with low risk of bias (reference category) for binary outcomes as pooled ratio of risk ratios.....                                                                                                                                          | 37 |
| <b>Figure S39:</b> Incomplete outcome data: Comparisons of randomised controlled trials with high/unclear risk of bias versus those with low risk of bias (reference category) for binary outcomes as pooled ratio of risk ratios. Sensitivity analysis: Excluding highly correlated outcomes .....                                                                             | 38 |
| <b>Figure S40:</b> Incomplete outcome data: Comparisons of randomised controlled trials with high/unclear risk of bias versus those with low risk of bias (reference category) for binary outcomes as pooled ratio of risk ratios. Sensitivity analysis: Including only one outcome per comparison from each included systematic review .....                                   | 38 |
| <b>Figure S41:</b> Incomplete outcome data: Comparisons of randomised controlled trials with high/unclear risk of bias versus those with low risk of bias (reference category) for binary outcomes as pooled ratio of risk ratios. Subgroup analysis: Clusters of interventions .....                                                                                           | 39 |
| <b>Figure S42:</b> Incomplete outcome data: Comparisons of randomised controlled trials with high/unclear risk of bias versus those with low risk of bias (reference category) for binary outcomes as pooled ratio of risk ratios. Subgroup analysis: Clusters of outcomes.....                                                                                                 | 40 |
| <b>Figure S43:</b> Incomplete outcome data: Comparisons of randomised controlled trials with high/unclear risk of bias versus those with low risk of bias (reference category) for binary outcomes as pooled ratio of risk ratios. Subgroup analysis: Subjective versus objective outcomes .....                                                                                | 41 |

|                                                                                                                                                                                                                                                                                                                                                                          |    |
|--------------------------------------------------------------------------------------------------------------------------------------------------------------------------------------------------------------------------------------------------------------------------------------------------------------------------------------------------------------------------|----|
| <b>Figure S44:</b> Incomplete outcome data: Comparisons of randomised controlled trials with high/unclear risk of bias versus those with low risk of bias (reference category) for continuous outcomes as pooled difference of standardised mean differences .....                                                                                                       | 42 |
| <b>Figure S45:</b> Incomplete outcome data: Comparisons of randomised controlled trials with high/unclear risk of bias versus those with low risk of bias (reference category) for continuous outcomes as pooled difference of standardised mean differences. Sensitivity analysis: Excluding highly correlated outcomes.....                                            | 43 |
| <b>Figure S46:</b> Incomplete outcome data: Comparisons of randomised controlled trials with high/unclear risk of bias versus those with low risk of bias (reference category) for continuous outcomes as pooled difference of standardised mean differences. Sensitivity analysis: Including only one outcome per comparison from each included systematic review ..... | 43 |
| <b>Figure S47:</b> Selective Reporting: Comparisons of randomised controlled trials with high/unclear risk of bias versus those with low risk of bias (reference category) for binary outcomes as pooled ratio of risk ratios .....                                                                                                                                      | 44 |
| <b>Figure S48:</b> Selective Reporting: Comparisons of randomised controlled trials with high/unclear risk of bias versus those with low risk of bias (reference category) for binary outcomes as pooled ratio of risk ratios. Sensitivity analysis: Excluding highly correlated outcomes .....                                                                          | 45 |
| <b>Figure S49:</b> Selective Reporting: Comparisons of randomised controlled trials with high/unclear risk of bias versus those with low risk of bias (reference category) for binary outcomes as pooled ratio of risk ratios. Sensitivity analysis: Including only one outcome per comparison from each included systematic review .....                                | 45 |
| <b>Figure S50:</b> Selective Reporting: Comparisons of randomised controlled trials with high/unclear risk of bias versus those with low risk of bias (reference category) for binary outcomes as pooled ratio of risk ratios. Subgroup analysis: Clusters of interventions .....                                                                                        | 46 |
| <b>Figure S51:</b> Selective Reporting: Comparisons of randomised controlled trials with high/unclear risk of bias versus those with low risk of bias (reference category) for binary outcomes as pooled ratio of risk ratios. Subgroup analysis: Clusters of outcomes .....                                                                                             | 47 |
| <b>Figure S52:</b> Selective Reporting: Comparisons of randomised controlled trials with high/unclear risk of bias versus those with low risk of bias (reference category) for binary outcomes as pooled ratio of risk ratios. Subgroup analysis: Subjective versus objective outcomes.....                                                                              | 48 |
| <b>Figure S53:</b> Selective Reporting: Comparisons of randomised controlled trials with high/unclear risk of bias versus those with low risk of bias (reference category) for continuous outcomes as pooled difference of standardised mean differences .....                                                                                                           | 49 |
| <b>Figure S54:</b> Selective Reporting: Comparisons of randomised controlled trials with high/unclear risk of bias versus those with low risk of bias (reference category) for continuous outcomes as pooled difference of standardised mean differences. Sensitivity analysis: Including only one outcome per comparison from each included systematic review .....     | 49 |
| <b>Figure S55:</b> Selective Reporting: Comparisons of randomised controlled trials with high/unclear risk of bias versus those with low risk of bias (reference category) for continuous outcomes as pooled difference of standardised mean differences. Sensitivity analysis: Excluding highly correlated outcomes.....                                                | 50 |
| <b>Figure S56:</b> Dietary Compliance: Comparisons of randomised controlled trials with high/unclear risk of bias versus those with low risk of bias (reference category) for binary outcomes as pooled ratio of risk ratios .....                                                                                                                                       | 51 |
| <b>Figure S57:</b> Dietary Compliance: Comparisons of randomised controlled trials with high/unclear risk of bias versus those with low risk of bias (reference category) for binary outcomes as pooled ratio of risk ratios. Sensitivity analysis: Excluding highly correlated outcomes .....                                                                           | 51 |
| <b>Figure S58:</b> Dietary Compliance: Comparisons of randomised controlled trials with high/unclear risk of bias versus those with low risk of bias (reference category) for binary outcomes as pooled ratio of                                                                                                                                                         |    |

|                                                                                                                                                                                                                                                                                            |    |
|--------------------------------------------------------------------------------------------------------------------------------------------------------------------------------------------------------------------------------------------------------------------------------------------|----|
| risk ratios. Sensitivity analysis: Including only one outcome per comparison from each included systematic review .....                                                                                                                                                                    | 52 |
| <b>Figure S59:</b> Dietary Compliance: Comparisons of randomised controlled trials with high/unclear risk of bias versus those with low risk of bias (reference category) for binary outcomes as pooled ratio of risk ratios. Subgroup analysis: Cluster of interventions .....            | 52 |
| <b>Figure S60:</b> Dietary Compliance: Comparisons of randomised controlled trials with high/unclear risk of bias versus those with low risk of bias (reference category) for binary outcomes as pooled ratio of risk ratios. Subgroup analysis: Clusters of outcomes .....                | 53 |
| <b>Figure S61:</b> Dietary Compliance: Comparisons of randomised controlled trials with high/unclear risk of bias versus those with low risk of bias (reference category) for binary outcomes as pooled ratio of risk ratios. Subgroup analysis: Subjective versus objective outcomes..... | 54 |

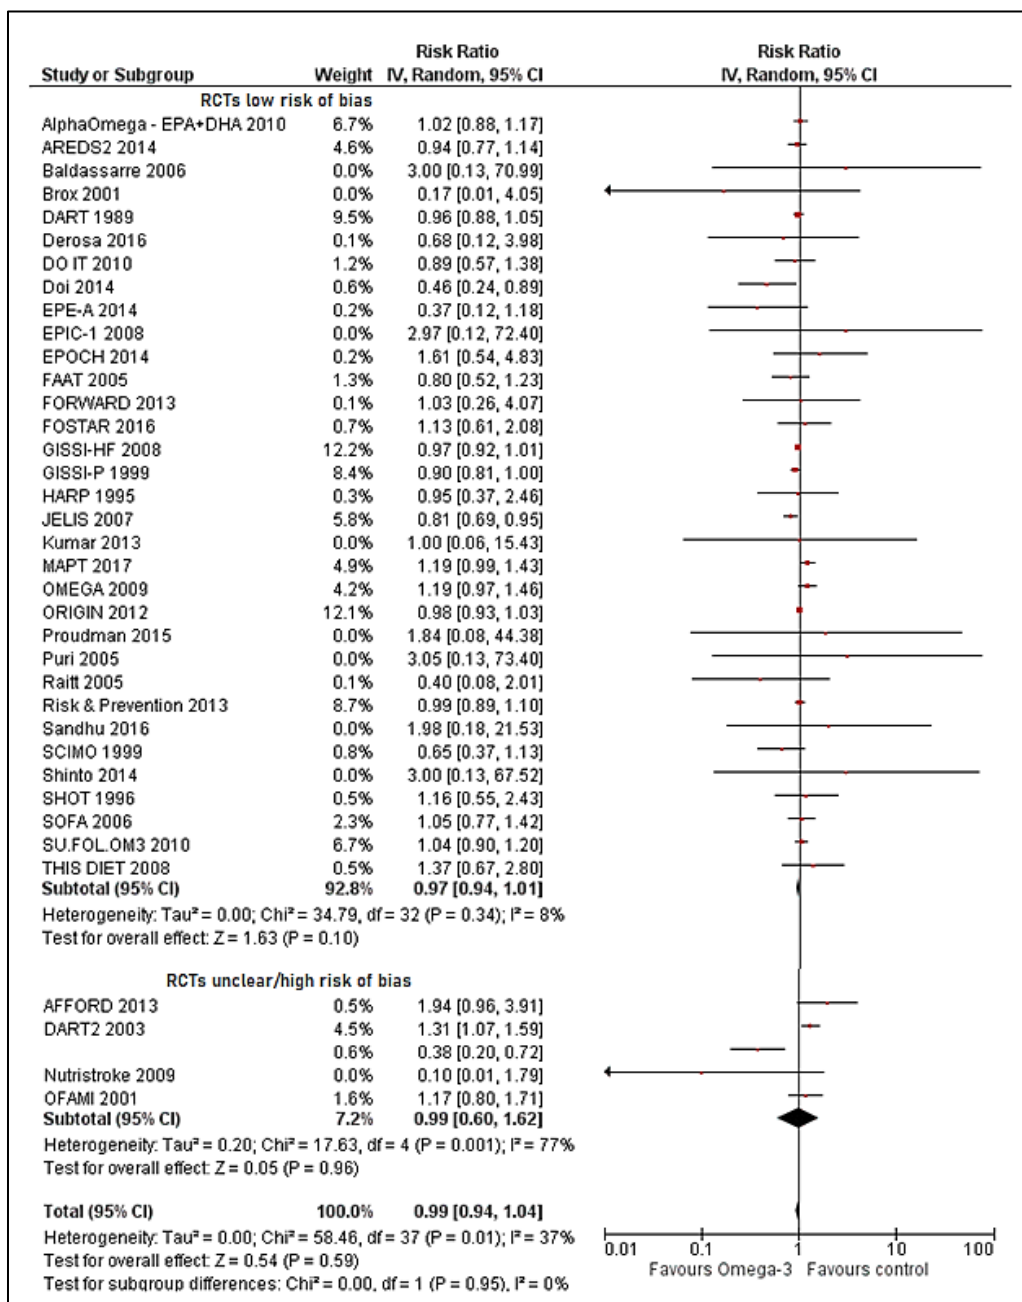

**Figure S1:** Example of calculating effect estimates for randomised controlled trials at low risk of bias and unclear/high risk of bias; domain: random sequence  
 CI: confidence interval; df: degrees of freedom; I<sup>2</sup>: heterogeneity measure; IV: inverse variance; RCT: randomised controlled trial

## Methodological trial characteristic: Random Sequence

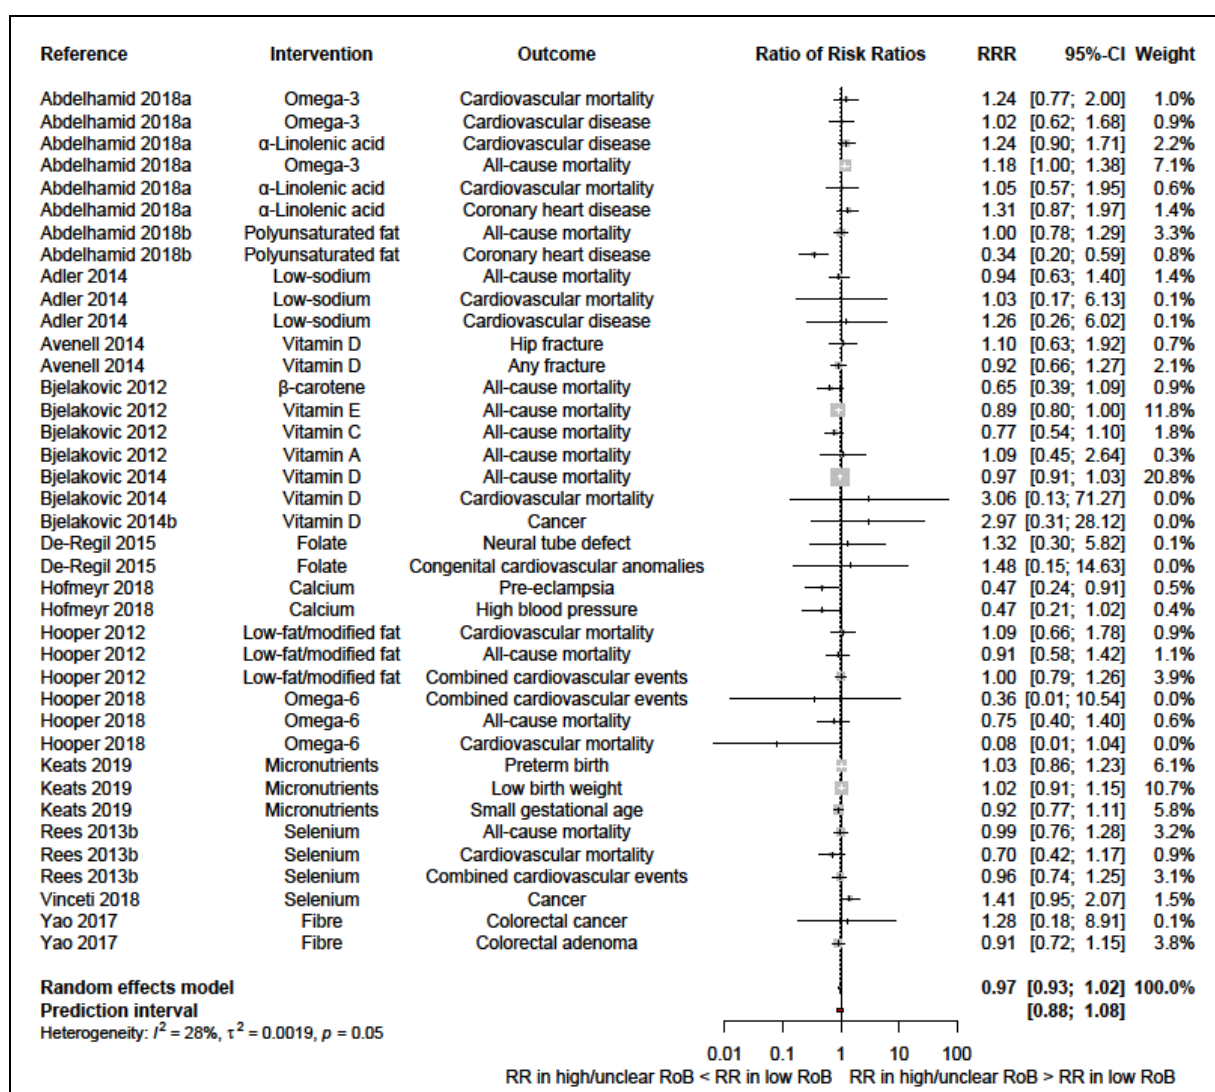

**Figure S2:** Random sequence: Comparisons of randomised controlled trials with high/unclear risk of bias versus those with low risk of bias (reference category) for binary outcomes as pooled ratio of risk ratios

CI: confidence interval;  $I^2$ : heterogeneity measure; RoB: risk of bias; RR: risk ratio; RRR: ratio of risk ratios;  $\tau^2$ : heterogeneity value with Restricted Maximum-likelihood estimation method



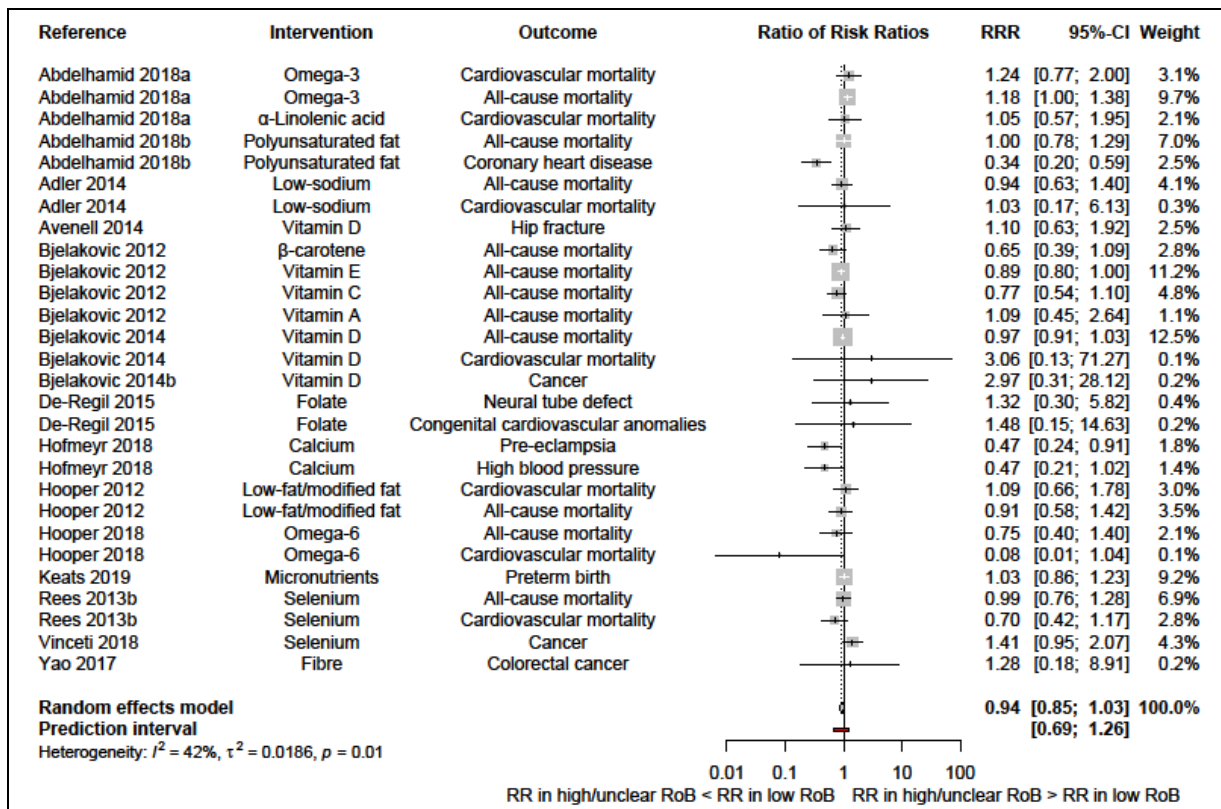

**Figure S3:** Random sequence: Comparisons of randomised controlled trials with high/unclear risk of bias versus those with low risk of bias (reference category) for binary outcomes as pooled ratio of risk ratios. Sensitivity analysis: Excluding highly correlated outcomes  
 CI: confidence interval;  $I^2$ : heterogeneity measure; RoB: risk of bias; RR: risk ratio; RRR: ratio of risk ratios;  $\tau^2$ : heterogeneity value with Restricted Maximum-likelihood estimation method

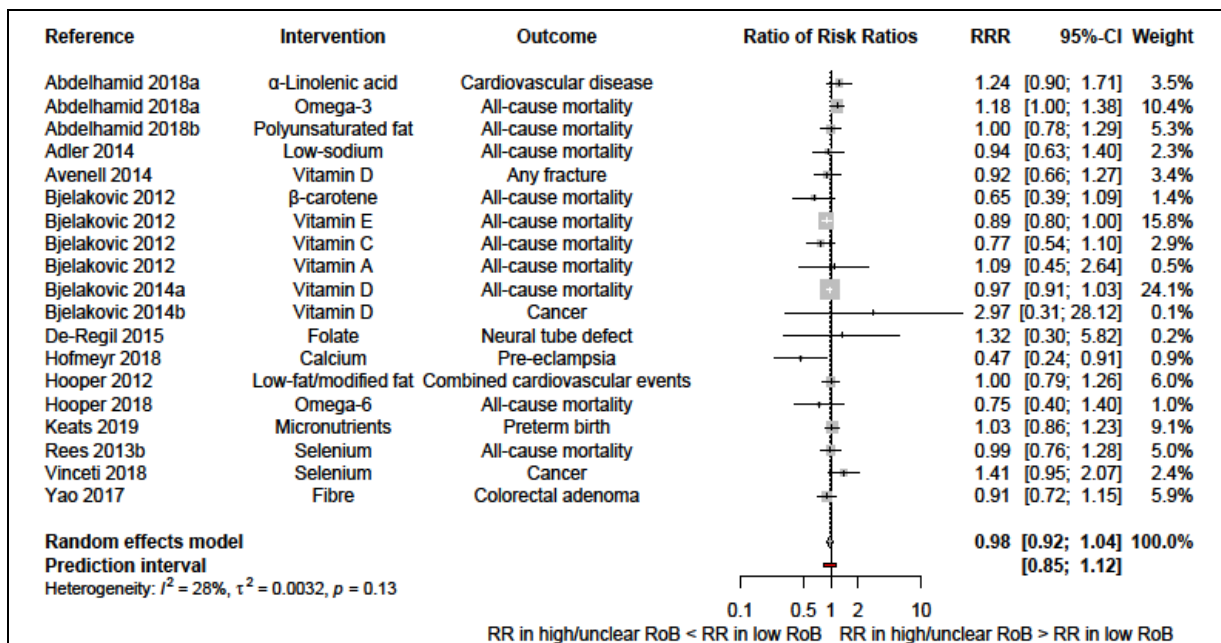

**Figure S4:** Random sequence: Comparisons of randomised controlled trials with high/unclear risk of bias versus those with low risk of bias (reference category) for binary outcomes as pooled ratio of risk ratios. Sensitivity analysis: Including only one outcome per comparison from each included systematic review  
 CI: confidence interval;  $I^2$ : heterogeneity measure; RoB: risk of bias; RR: risk ratio; RRR: ratio of risk ratios;  $\tau^2$ : heterogeneity value with Restricted Maximum-likelihood estimation method

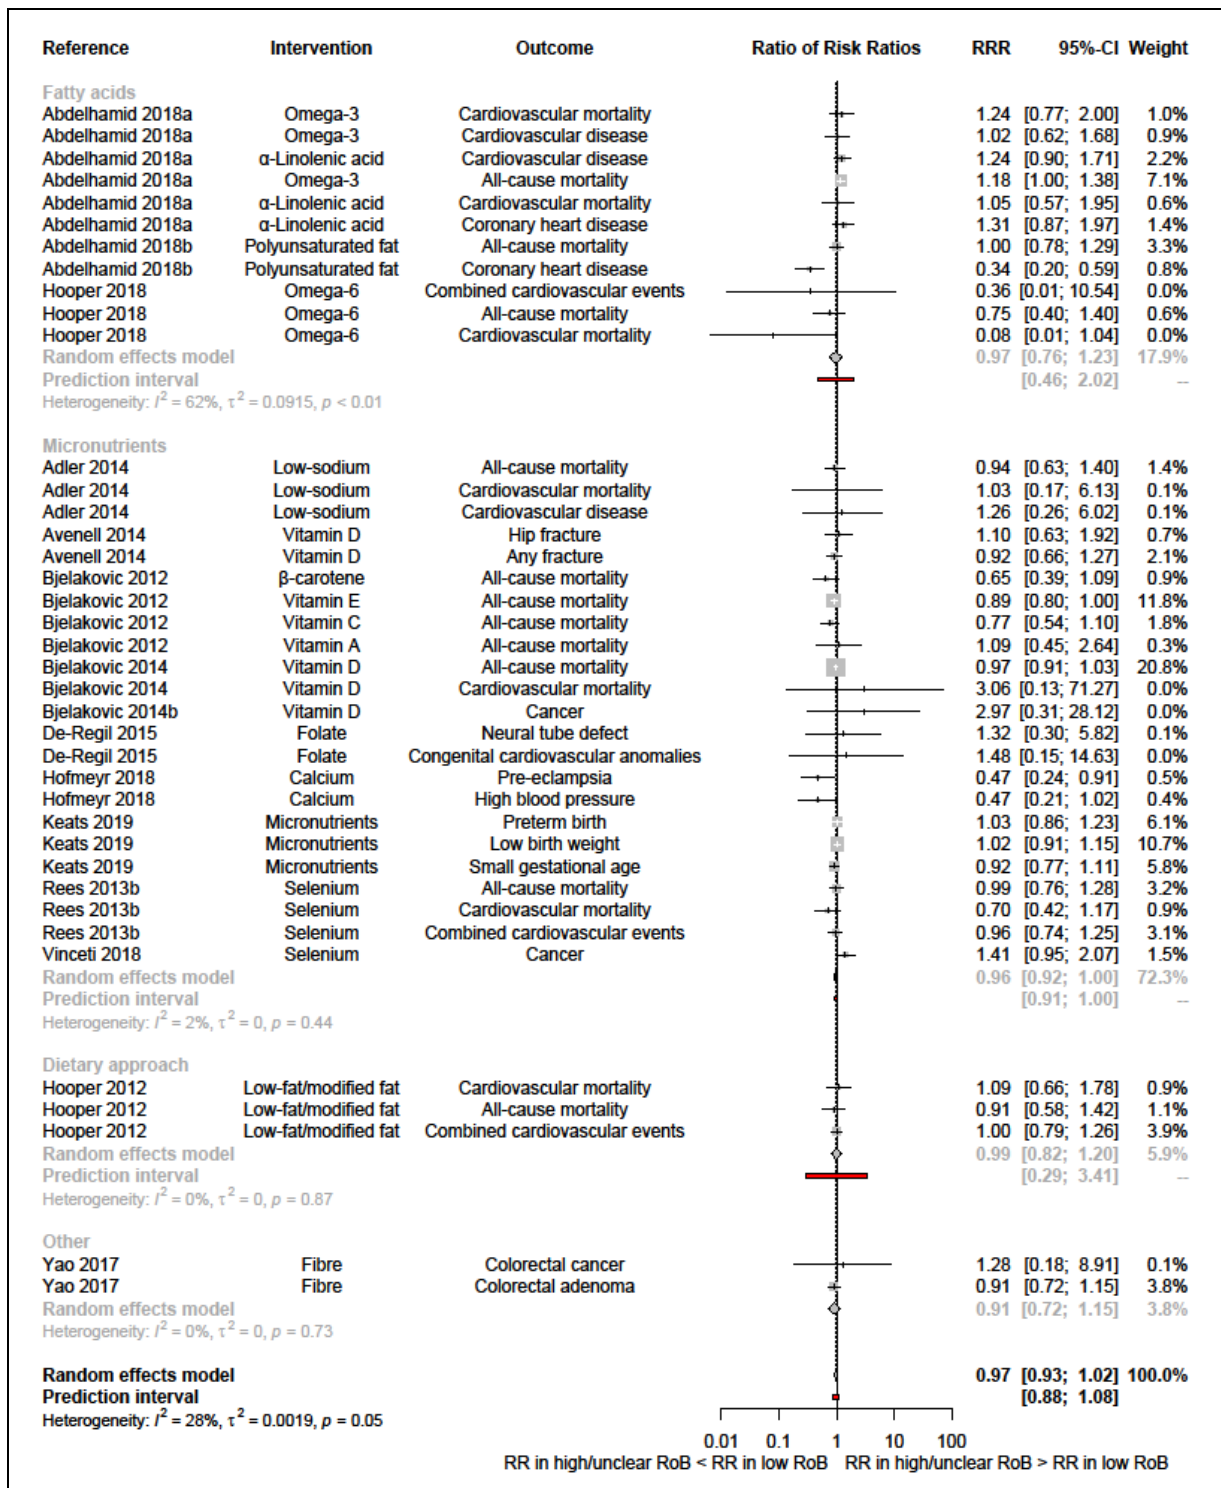

**Figure S5:** Random sequence: Comparisons of randomised controlled trials with high/unclear risk of bias versus those with low risk of bias (reference category) for binary outcomes as pooled ratio of risk ratios. Subgroup analysis: Clusters of interventions  
 CI: confidence interval;  $I^2$ : heterogeneity measure; RoB: risk of bias; RR: risk ratio; RRR: ratio of risk ratios;  $\tau^2$ : heterogeneity value with Restricted Maximum-likelihood estimation method

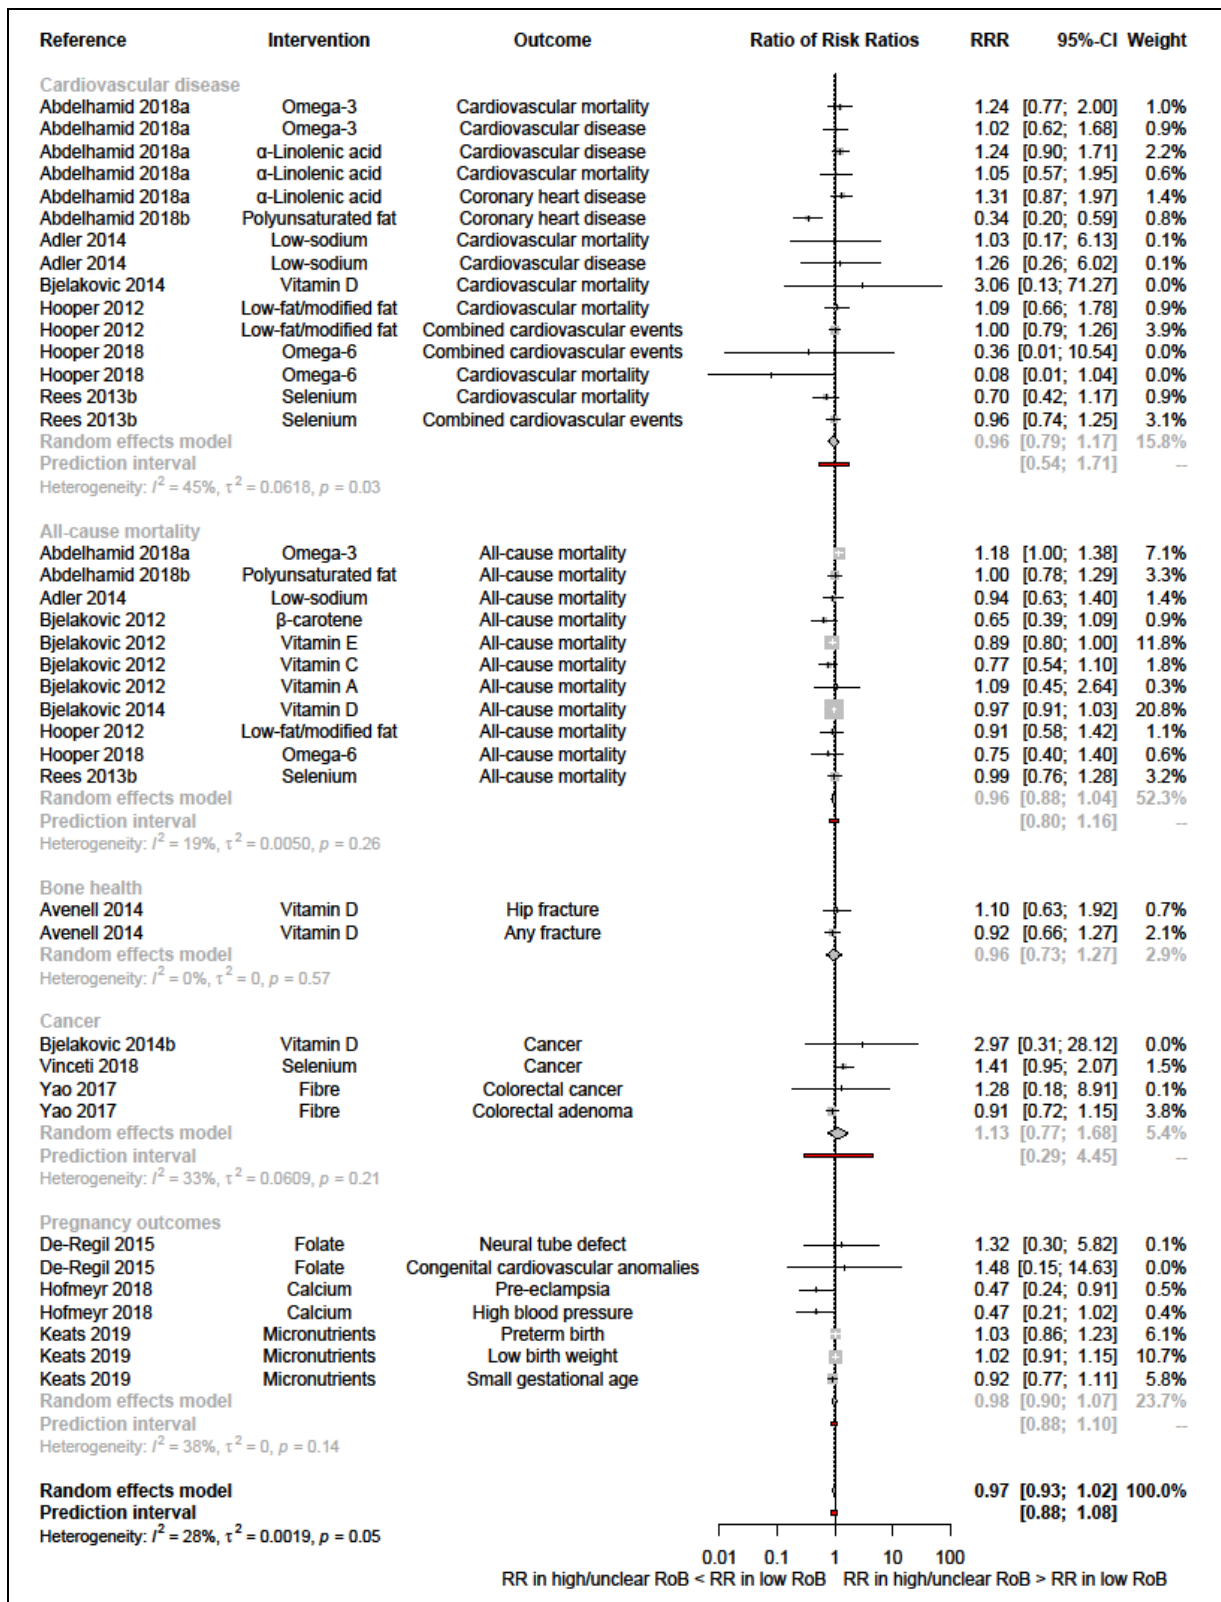

**Figure S6:** Random sequence: Comparisons of randomised controlled trials with high/unclear risk of bias versus those with low risk of bias (reference category) for binary outcomes as pooled ratio of risk ratios. Subgroup analysis: Clusters of outcomes  
 CI: confidence interval;  $I^2$ : heterogeneity measure; RoB: risk of bias; RR: risk ratio; RRR: ratio of risk ratios;  $\tau^2$ : heterogeneity value with Restricted Maximum-likelihood estimation method

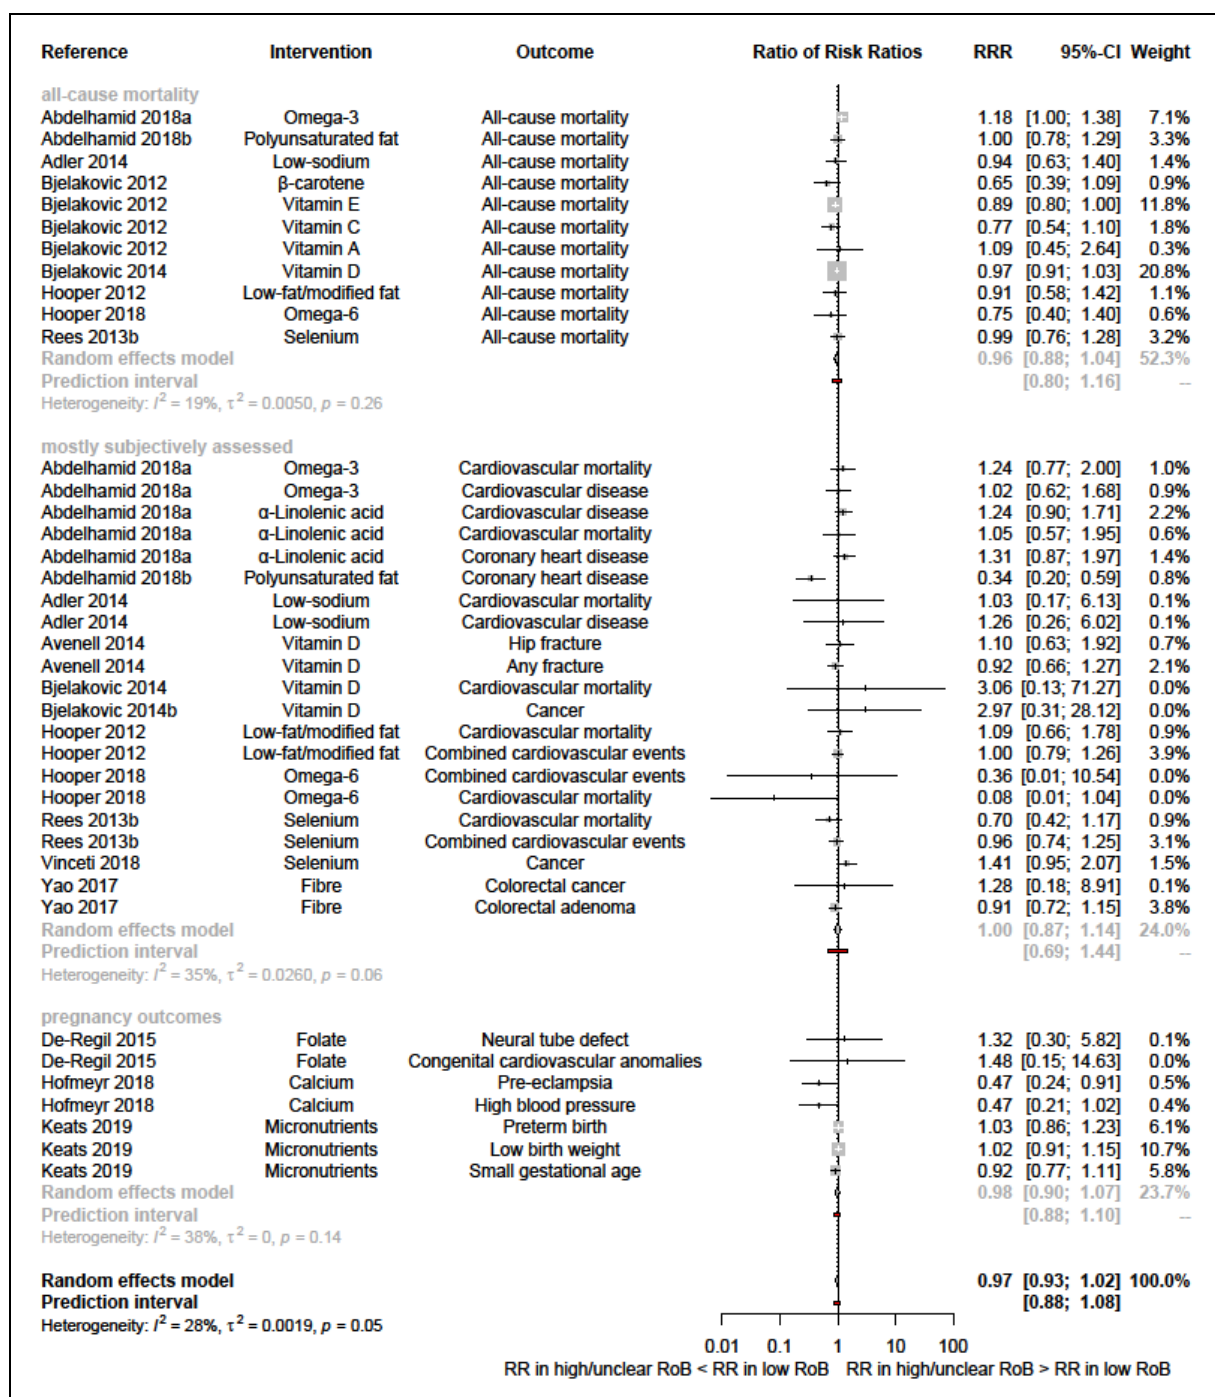

**Figure S7:** Random sequence: Comparisons of randomised controlled trials with high/unclear risk of bias versus those with low risk of bias (reference category) for binary outcomes as pooled ratio of risk ratios. Subgroup analysis: Subjective versus objective outcomes  
 CI: confidence interval;  $I^2$ : heterogeneity measure; RoB: risk of bias; RR: risk ratio; RRR: ratio of risk ratios;  $\tau^2$ : heterogeneity value with Restricted Maximum-likelihood estimation method



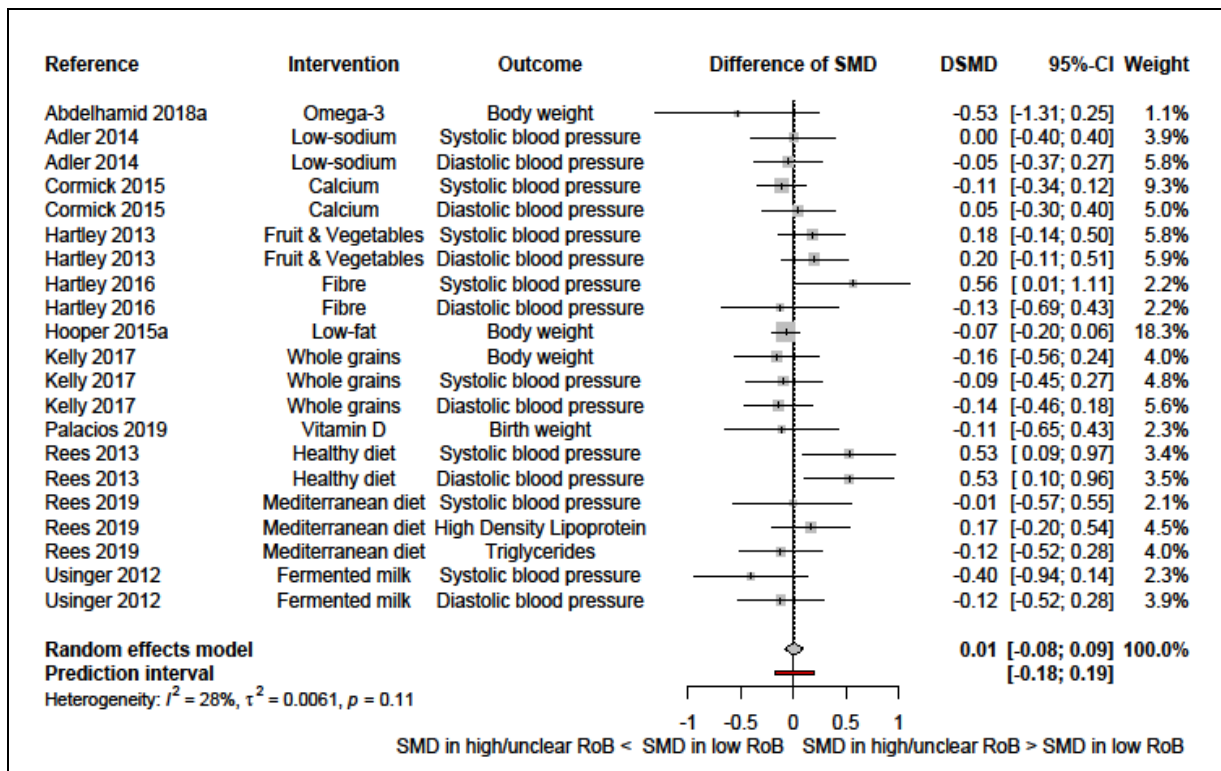

**Figure S8:** Random sequence: Comparisons of randomised controlled trials with high/unclear risk of bias versus those with low risk of bias (reference category) for continuous outcomes as pooled difference of standardised mean difference

CI: confidence interval; DSMD: difference of standardised mean differences;  $I^2$ : heterogeneity measure; RoB: risk of bias; SMD: standardised mean difference;  $\tau^2$ : heterogeneity value with Restricted Maximum-likelihood estimation method

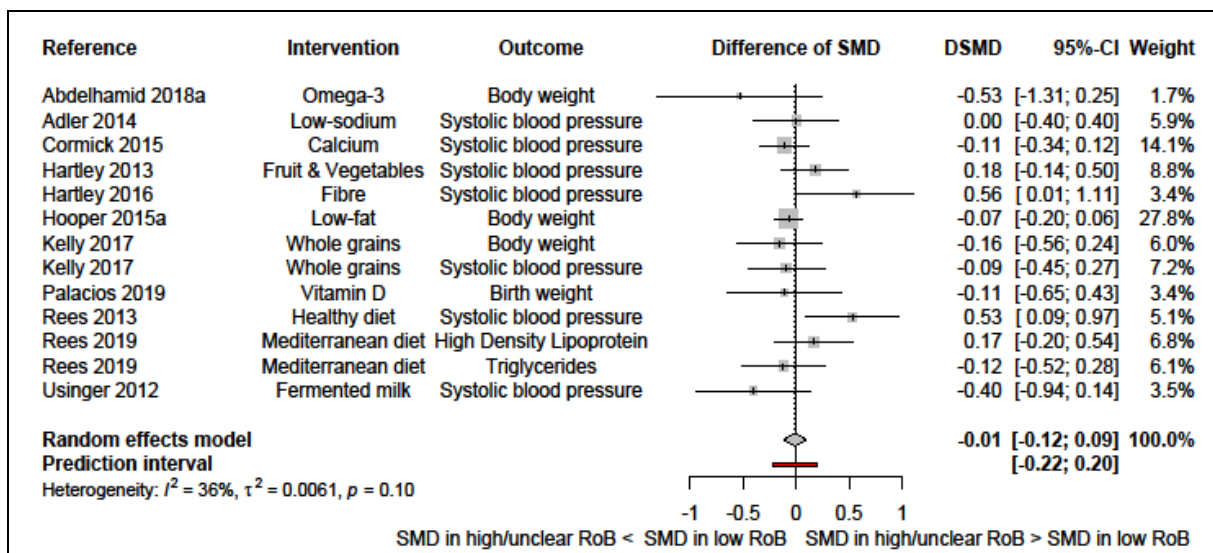

**Figure S9:** Random sequence: Comparisons of randomised controlled trials with high/unclear risk of bias versus those with low risk of bias (reference category) for continuous outcomes as pooled difference of standardised mean differences. Sensitivity analysis: Excluding highly correlated outcomes

CI: confidence interval; DSMD: difference of standardised mean differences;  $I^2$ : heterogeneity measure; RoB: risk of bias; SMD: standardised mean difference;  $\tau^2$ : heterogeneity value with Restricted Maximum-likelihood estimation method

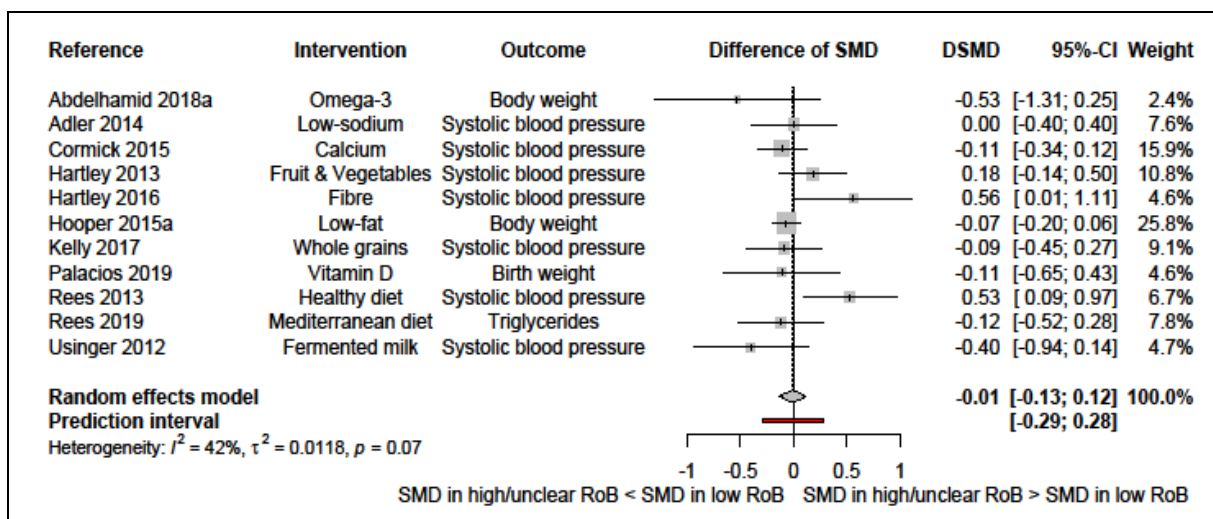

**Figure S10:** Random sequence: Comparisons of randomised controlled trials with high/unclear risk of bias versus those with low risk of bias (reference category) for continuous outcomes as pooled difference of standardised mean differences. Sensitivity analysis: Including only one outcome per comparison from each included systematic review

CI: confidence interval; DSMD: difference of standardised mean differences;  $I^2$ : heterogeneity measure; RoB: risk of bias; SMD: standardised mean difference;  $\tau^2$ : heterogeneity value with Restricted Maximum-likelihood estimation method

**Methodological trial characteristic: Allocation concealment**

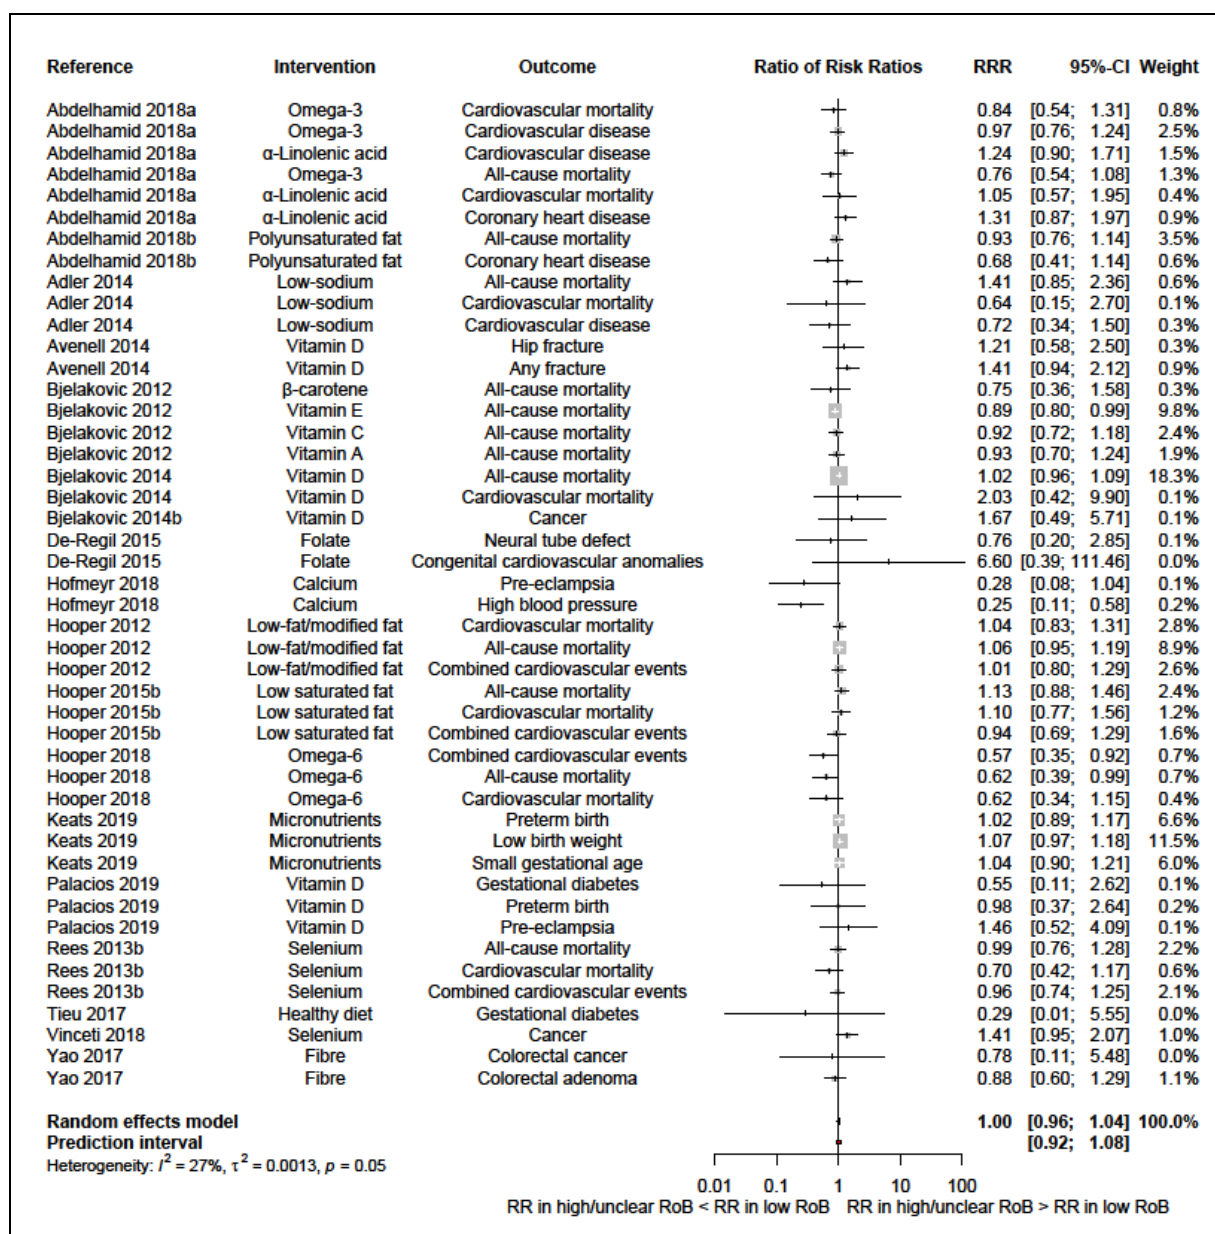

**Figure S11:** Allocation concealment: Comparisons of randomised controlled trials with high/unclear risk of bias versus those with low risk of bias (reference category) for binary outcomes as pooled ratio of risk ratios

CI: confidence interval;  $I^2$ : heterogeneity measure; RoB: risk of bias; RR: risk ratio; RRR: ratio of risk ratios;  $\tau^2$ : heterogeneity value with Restricted Maximum-likelihood estimation method

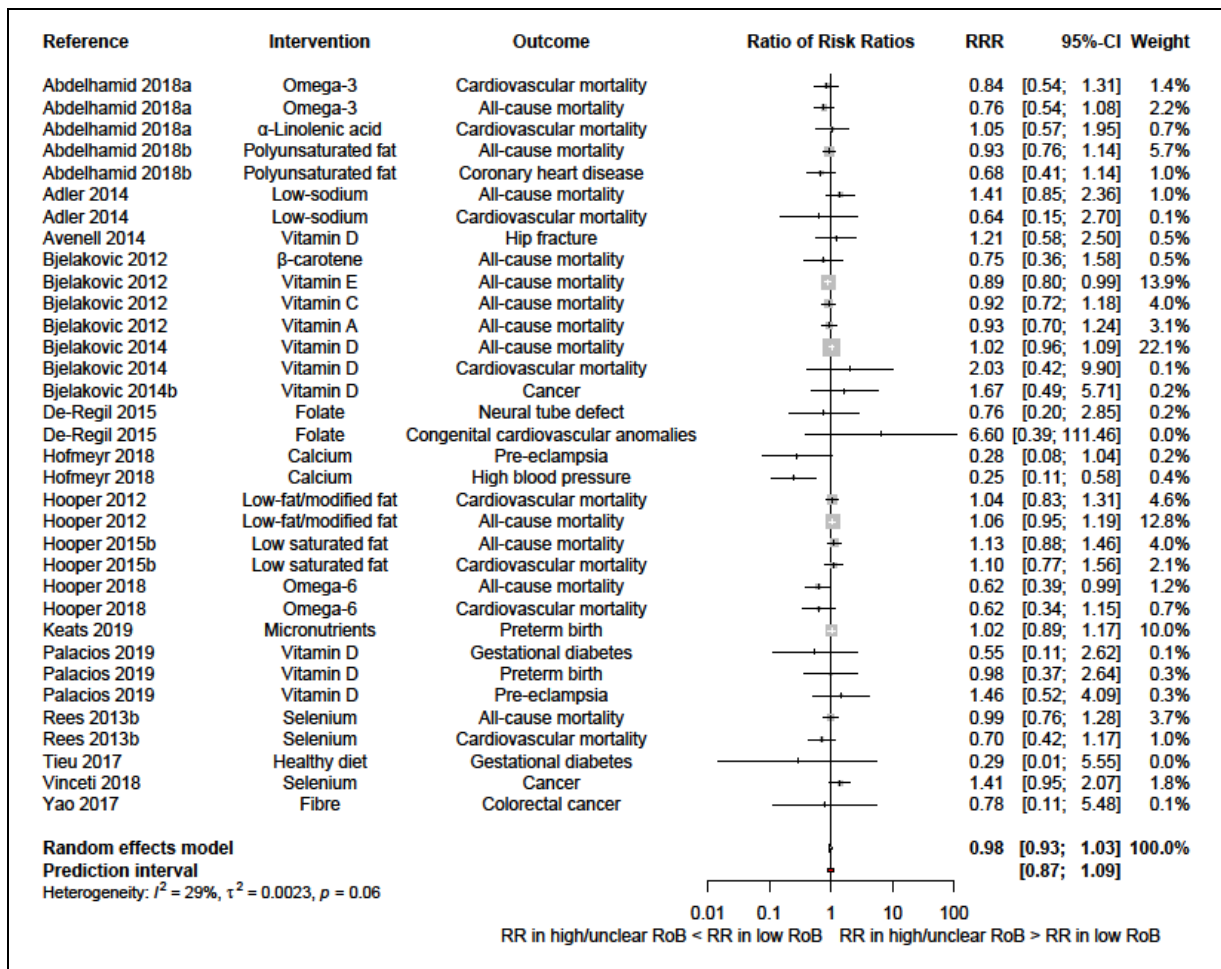

**Figure S12:** Allocation concealment: Comparisons of randomised controlled trials with high/unclear risk of bias versus those with low risk of bias (reference category) for binary outcomes as pooled ratio of risk ratios. Sensitivity analysis: Excluding highly correlated outcomes  
 CI: confidence interval;  $I^2$ : heterogeneity measure; RoB: risk of bias; RR: risk ratio; RRR: ratio of risk ratios;  $\tau^2$ : heterogeneity value with Restricted Maximum-likelihood estimation method



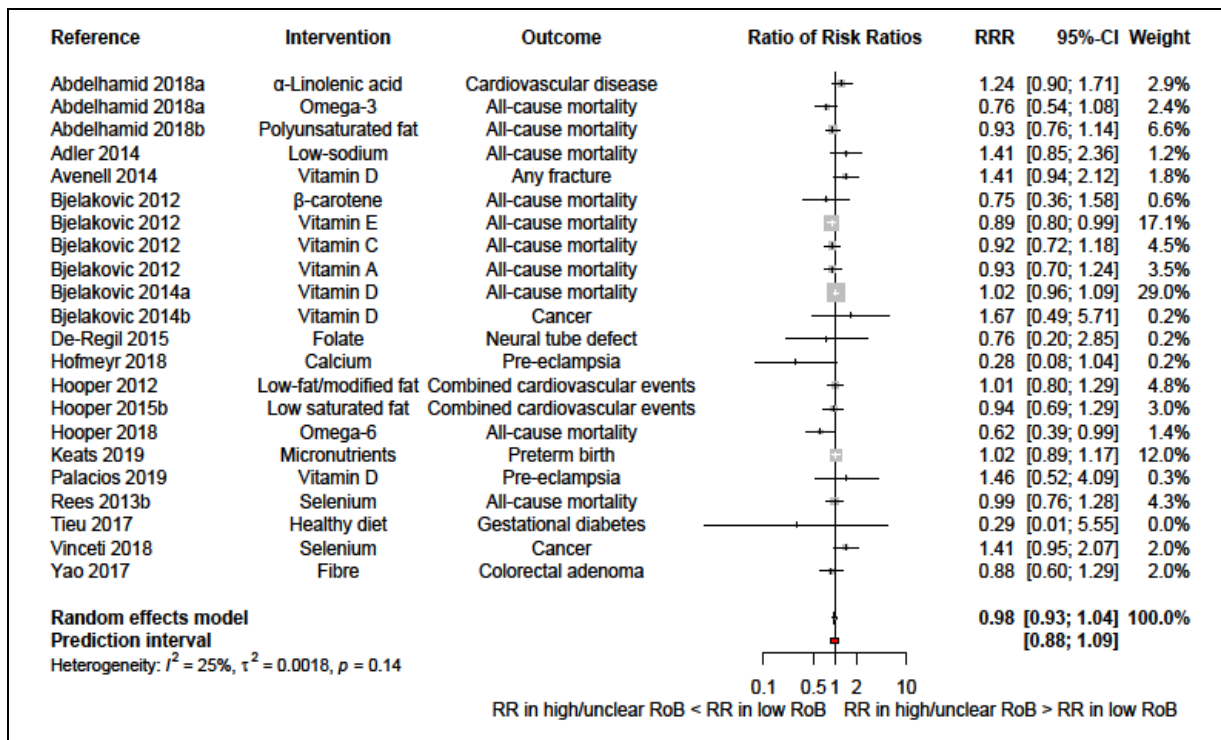

**Figure S13:** Allocation concealment: Comparisons of randomised controlled trials with high/unclear risk of bias versus those with low risk of bias (reference category) for binary outcomes as pooled ratio of risk ratios. Sensitivity analysis: Including only one outcome per comparison from each included systematic review

CI: confidence interval;  $I^2$ : heterogeneity measure; RoB: risk of bias; RR: risk ratio; RRR: ratio of risk ratios;  $\tau^2$ : heterogeneity value with Restricted Maximum-likelihood estimation method

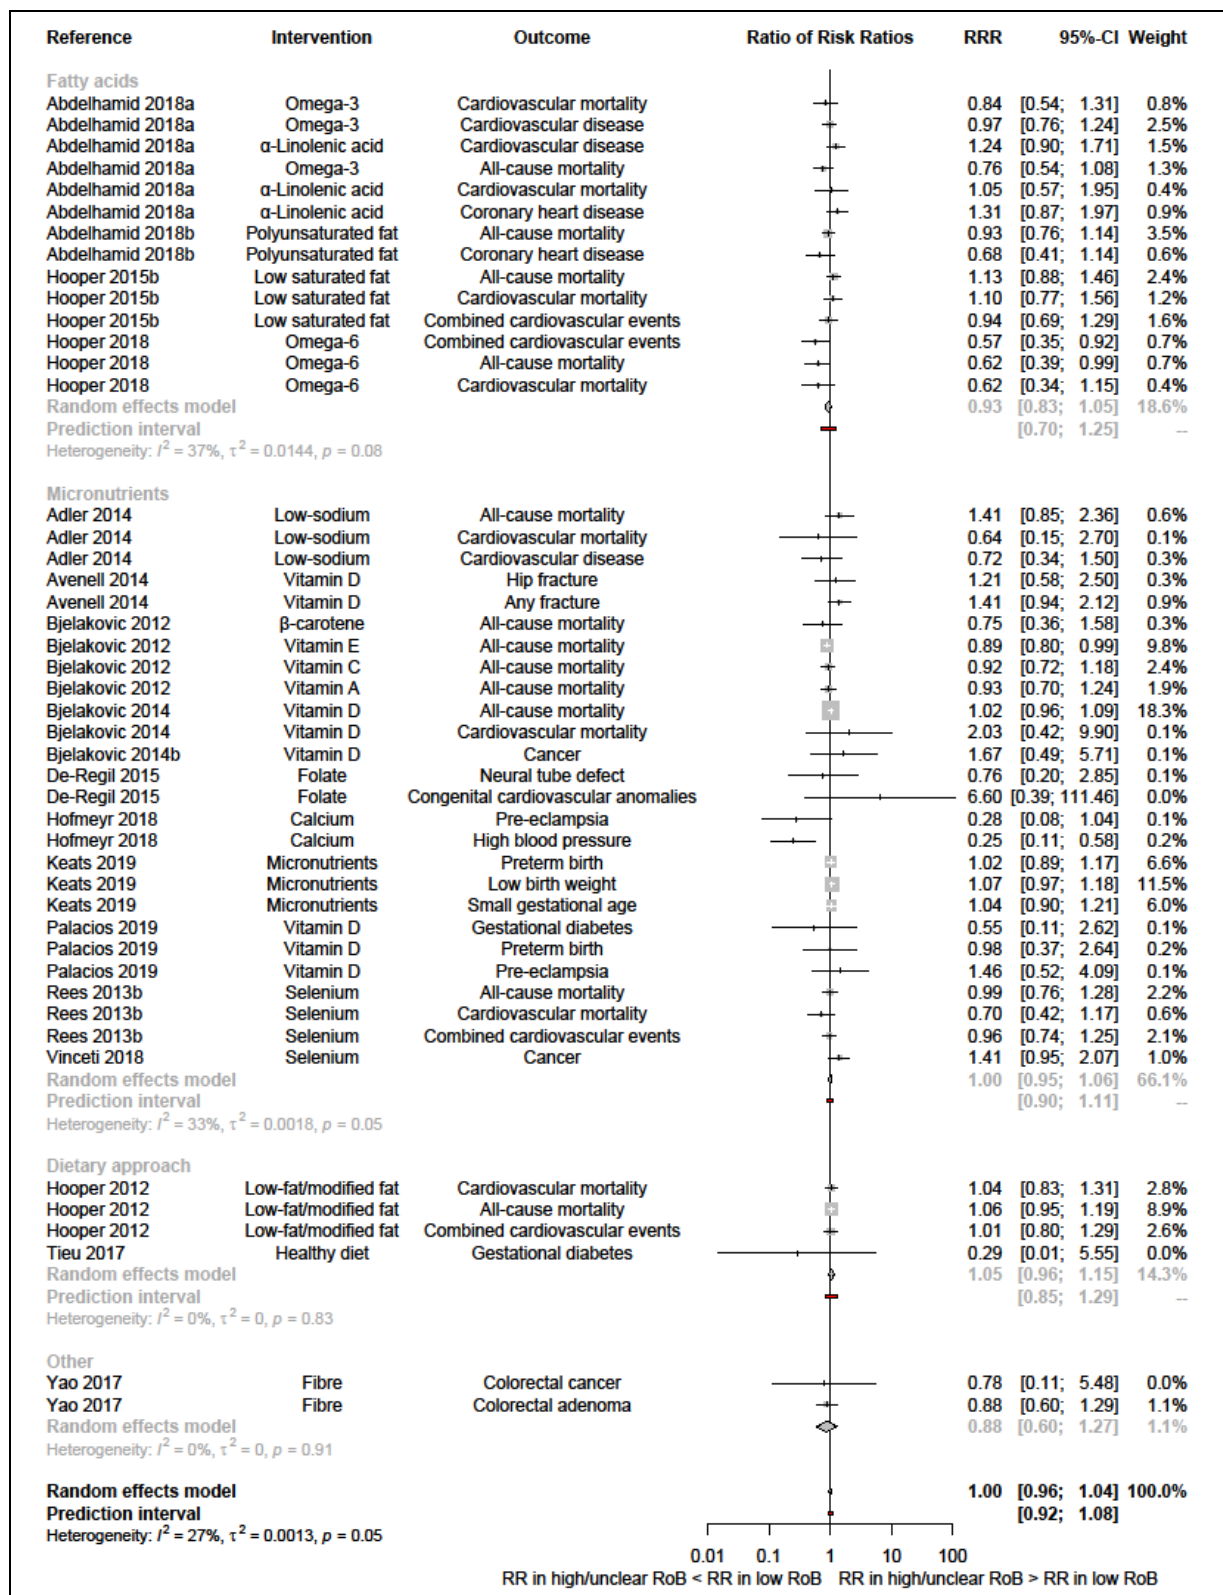

**Figure S14:** Allocation concealment: Comparisons of randomised controlled trials with high/unclear risk of bias versus those with low risk of bias (reference category) for binary outcomes as pooled ratio of risk ratios. Subgroup analysis: Clusters of interventions  
 CI: confidence interval;  $I^2$ : heterogeneity measure; RoB: risk of bias; RR: risk ratio; RRR: ratio of risk ratios;  $\tau^2$ : heterogeneity value with Restricted Maximum-likelihood estimation method

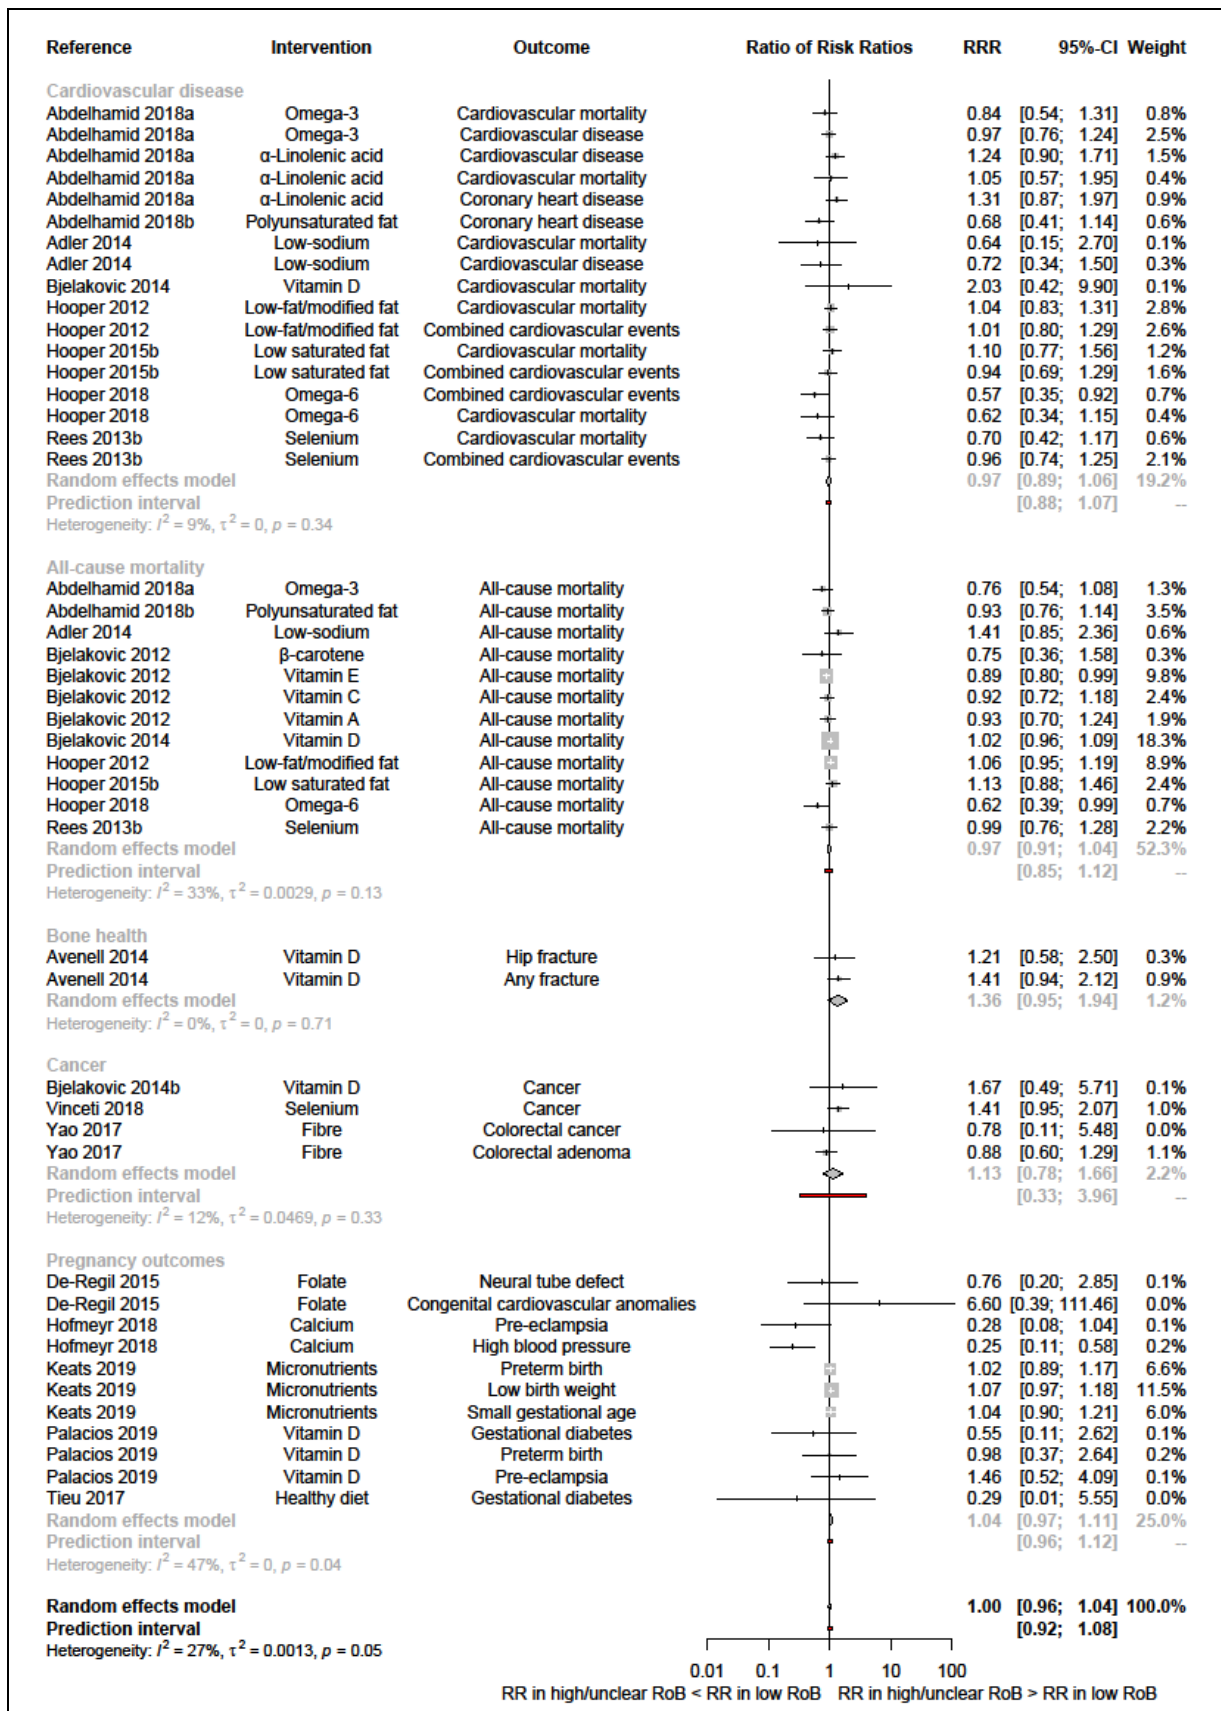

**Figure S15:** Allocation concealment: Comparisons of randomised controlled trials with high/unclear risk of bias versus those with low risk of bias (reference category) for binary outcomes as pooled ratio of risk ratios. Subgroup analysis: Clusters of outcomes  
 CI: confidence interval;  $I^2$ : heterogeneity measure; RoB: risk of bias; RR: risk ratio; RRR: ratio of risk ratios;  $\tau^2$ : heterogeneity value with Restricted Maximum-likelihood estimation method

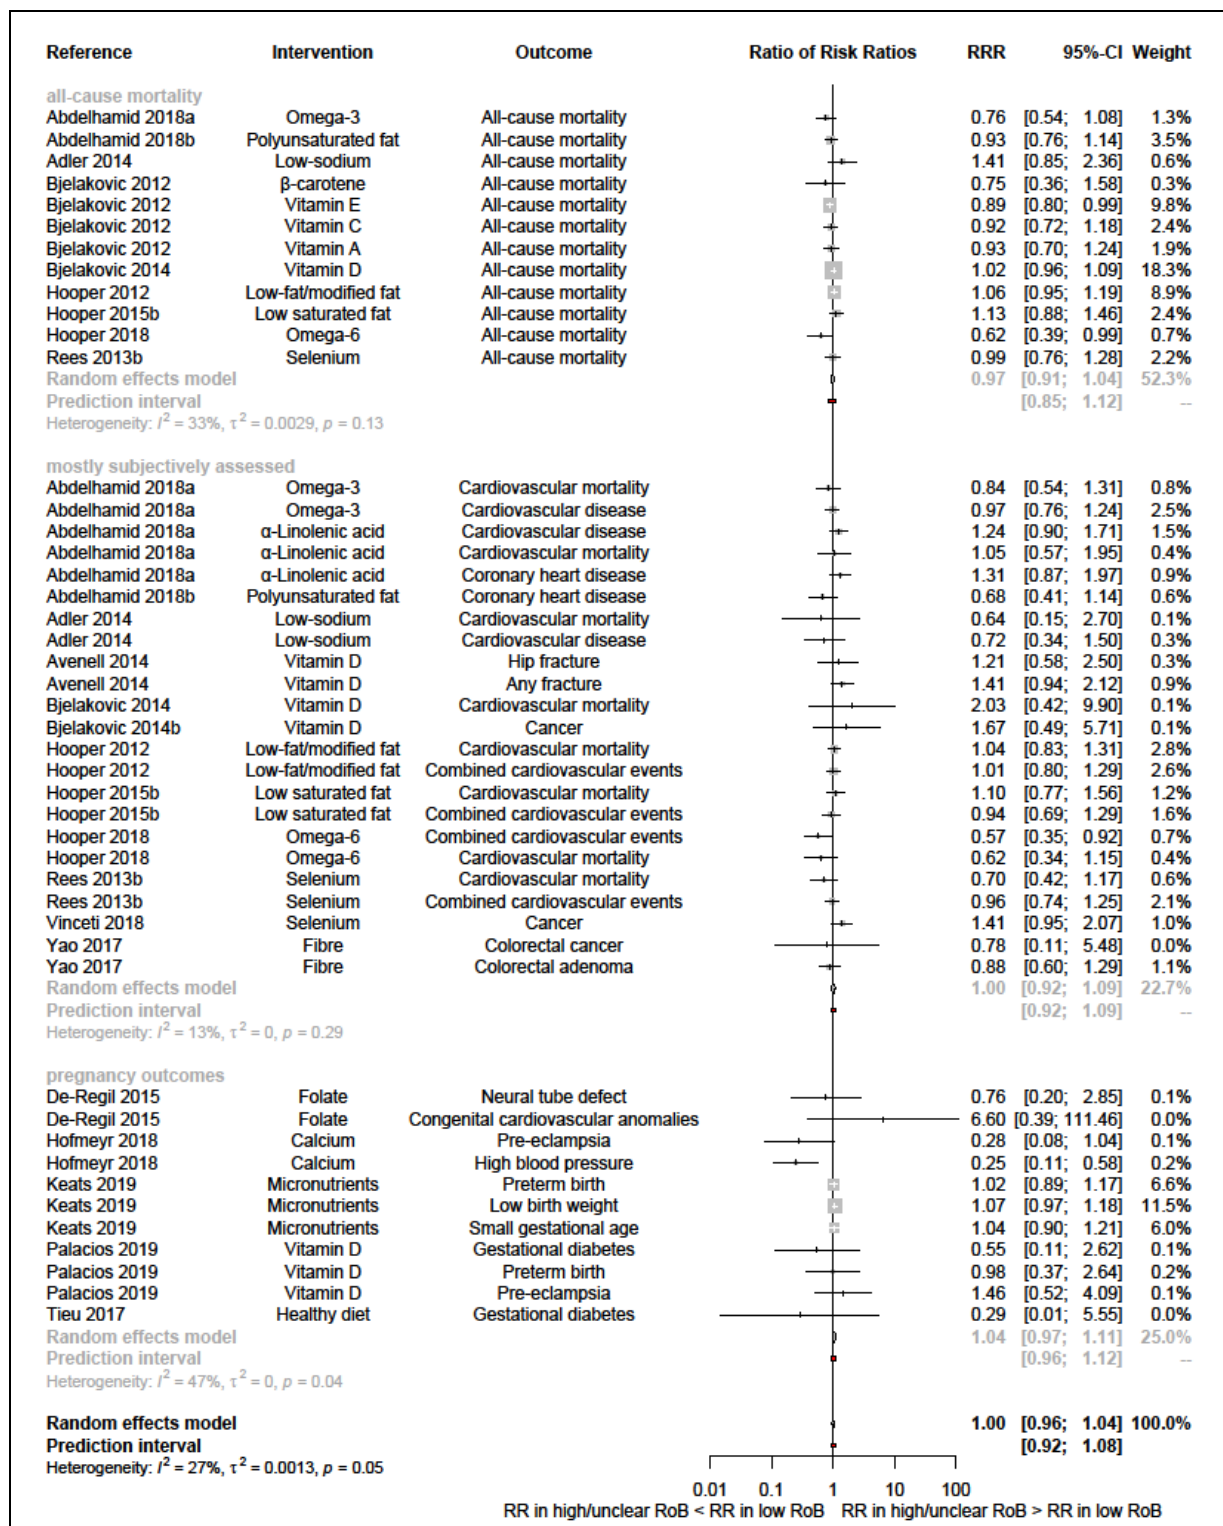

**Figure S16:** Allocation concealment: Comparisons of randomised controlled trials with high/unclear risk of bias versus those with low risk of bias (reference category) for binary outcomes as pooled ratio of risk ratios. Subgroup analysis: Subjective versus objective outcomes  
CI: confidence interval;  $I^2$ : heterogeneity measure; RoB: risk of bias; RR: risk ratio; RRR: ratio of risk ratios;  $\tau^2$ : heterogeneity value with Restricted Maximum-likelihood estimation method



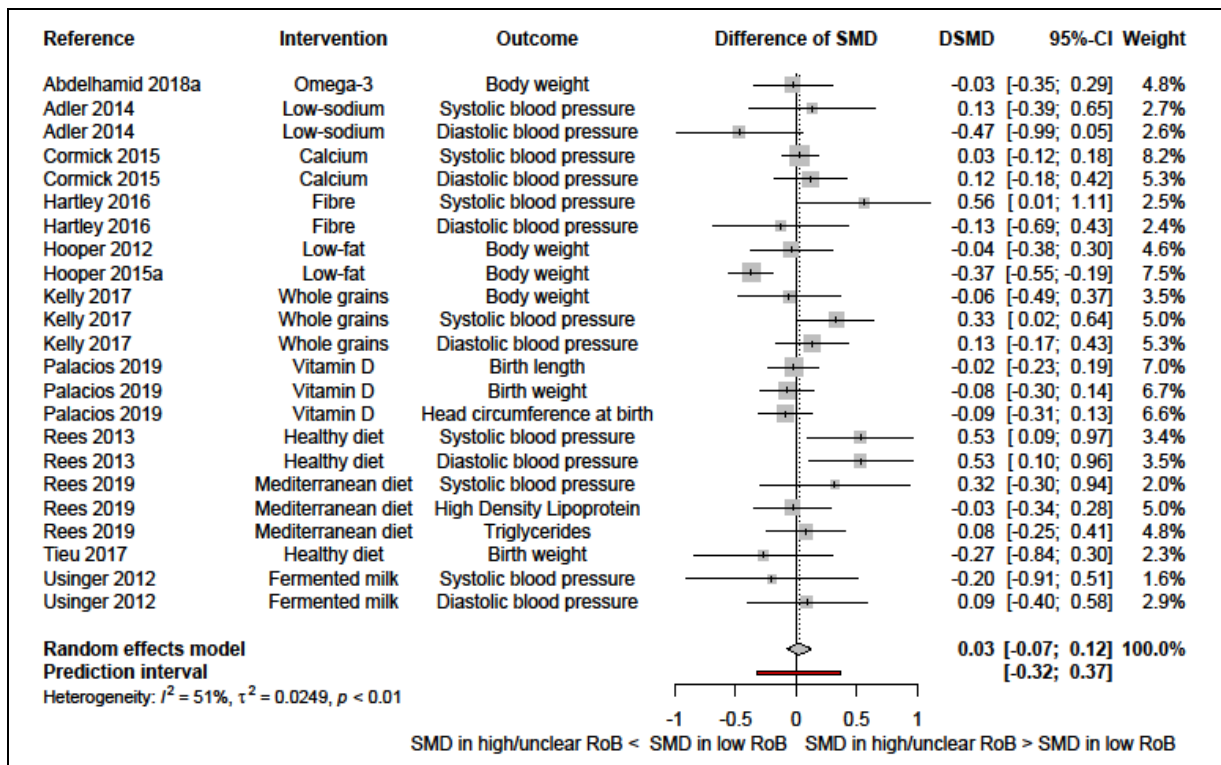

**Figure S17** Allocation concealment: Comparisons of randomised controlled trials with high/unclear risk of bias versus those with low risk of bias (reference category) for continuous outcomes as pooled difference of standardised mean differences

CI: confidence interval; DSMD: difference of standardised mean differences;  $I^2$ : heterogeneity measure; RoB: risk of bias; SMD: standardised mean difference;  $\tau^2$ : heterogeneity value with Restricted Maximum-likelihood estimation method

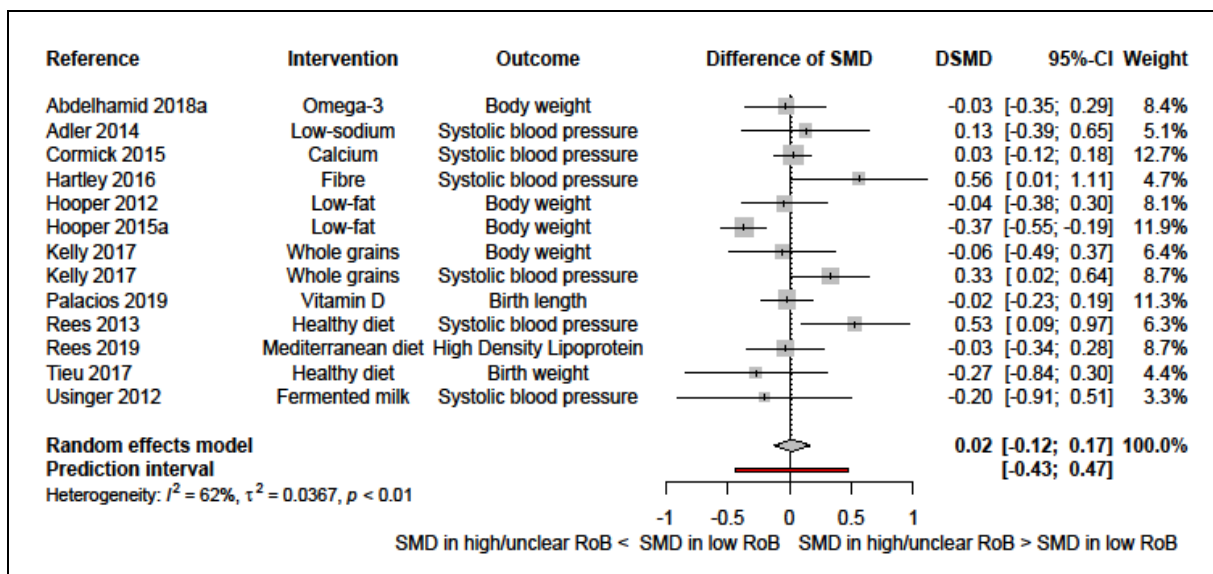

**Figure S18:** Allocation concealment: Comparisons of randomised controlled trials with high/unclear risk of bias versus those with low risk of bias (reference category) for continuous outcomes as pooled difference of standardised mean differences. Sensitivity analysis: Excluding highly correlated outcomes

CI: confidence interval; DSMD: difference of standardised mean differences;  $I^2$ : heterogeneity measure; RoB: risk of bias; SMD: standardised mean difference;  $\tau^2$ : heterogeneity value with Restricted Maximum-likelihood estimation method

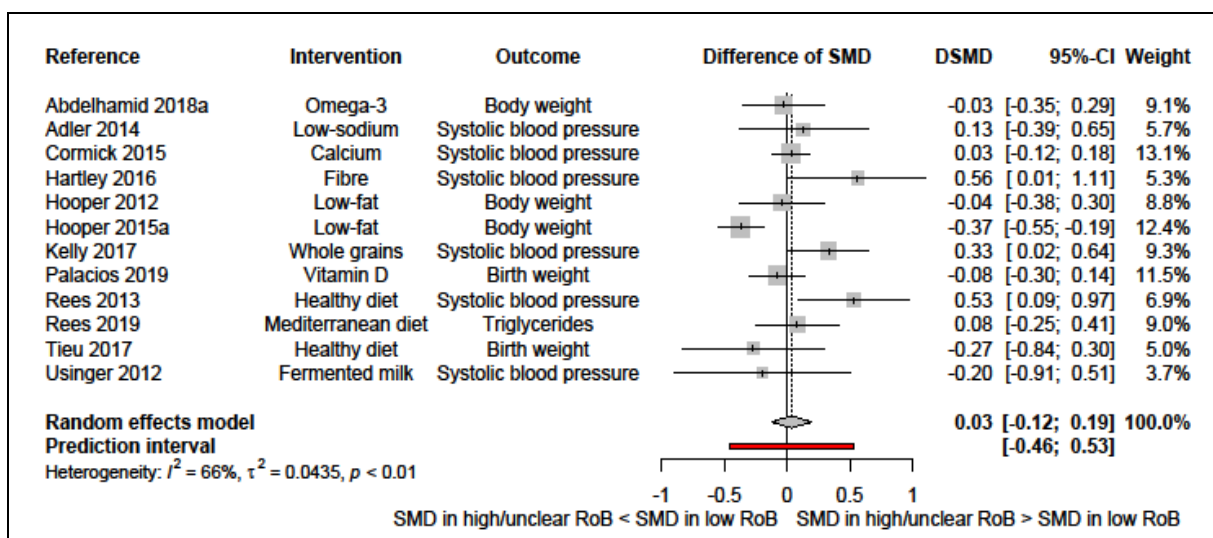

**Figure S19:** Allocation concealment: Comparisons of randomised controlled trials with high/unclear risk of bias versus those with low risk of bias (reference category) for continuous outcomes as pooled difference of standardised mean differences. Sensitivity analysis: Including only one outcome per comparison from each included systematic review

CI: confidence interval; DSMD: difference of standardised mean differences;  $I^2$ : heterogeneity measure; RoB: risk of bias; SMD: standardised mean difference;  $\tau^2$ : heterogeneity value with Restricted Maximum-likelihood estimation method

**Methodological trial characteristic: Blinding of participants and personnel**

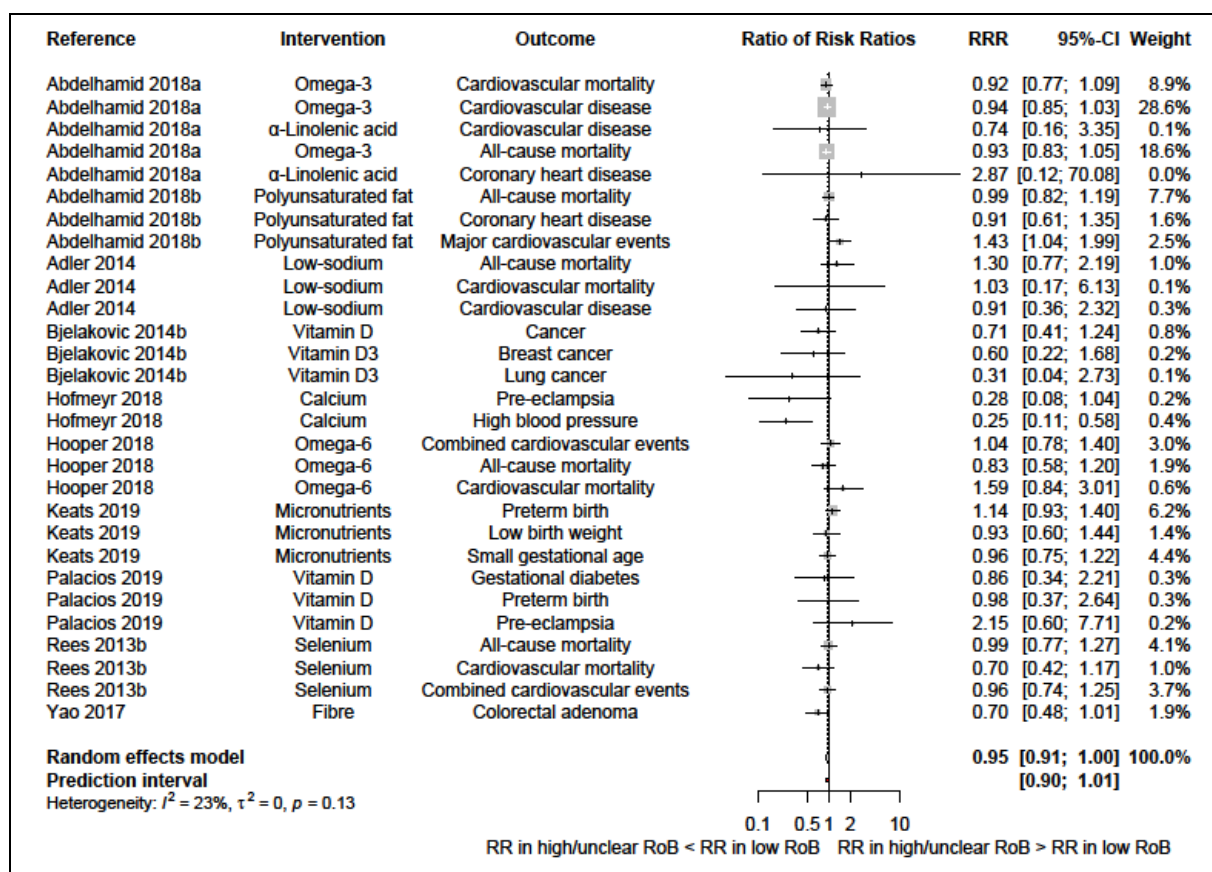

**Figure S20:** Blinding of participants and personnel: Comparisons of randomised controlled trials with high/unclear risk of bias versus those with low risk of bias (reference category) for binary outcomes as pooled ratio of risk ratios  
 CI: confidence interval;  $I^2$ : heterogeneity measure; RoB: risk of bias; RR: risk ratio; RRR: ratio of risk ratios;  $\tau^2$ : heterogeneity value with Restricted Maximum-likelihood estimation method

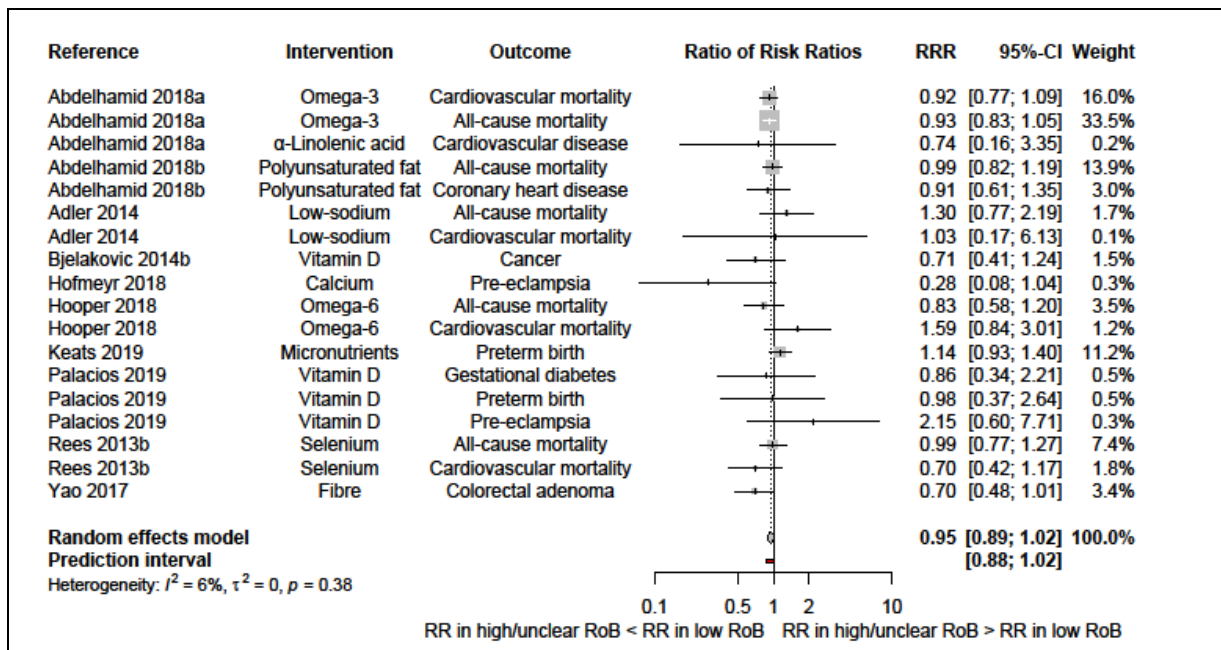

**Figure S21:** Blinding of participants and personnel: Comparisons of randomised controlled trials with high/unclear risk of bias versus those with low risk of bias (reference category) for binary outcomes as pooled ratio of risk ratios. Sensitivity analysis: Excluding highly correlated outcomes  
 CI: confidence interval;  $I^2$ : heterogeneity measure; RoB: risk of bias; RR: risk ratio; RRR: ratio of risk ratios;  $\tau^2$ : heterogeneity value with Restricted Maximum-likelihood estimation method

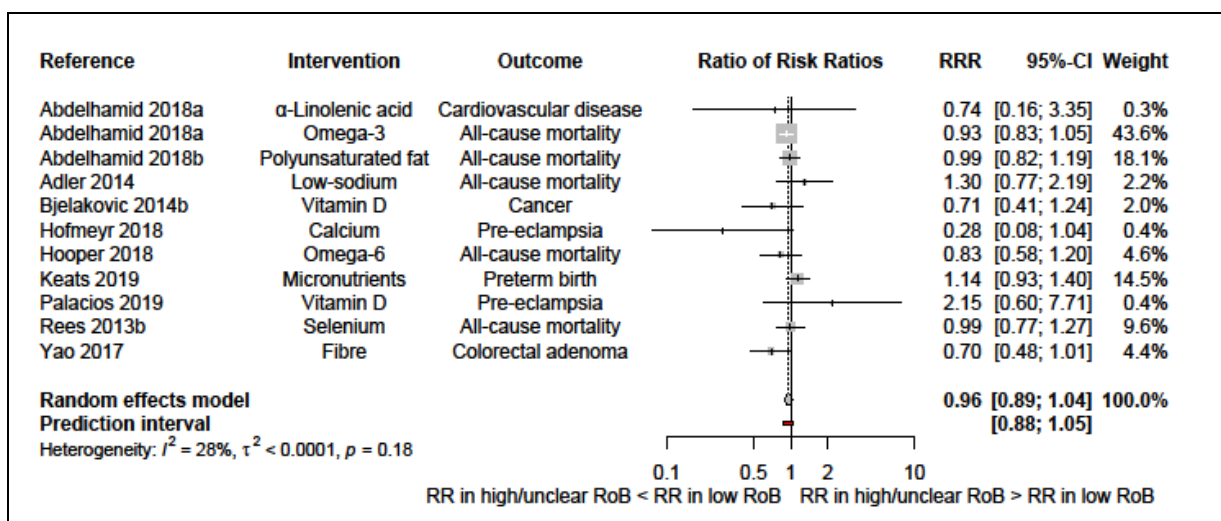

**Figure S22:** Blinding of participants and personnel: Comparisons of randomised controlled trials with high/unclear risk of bias versus those with low risk of bias (reference category) for binary outcomes as pooled ratio of risk ratios. Sensitivity analysis: Including only one outcome per comparison from each included systematic review  
 CI: confidence interval;  $I^2$ : heterogeneity measure; RoB: risk of bias; RR: risk ratio; RRR: ratio of risk ratios;  $\tau^2$ : heterogeneity value with Restricted Maximum-likelihood estimation method



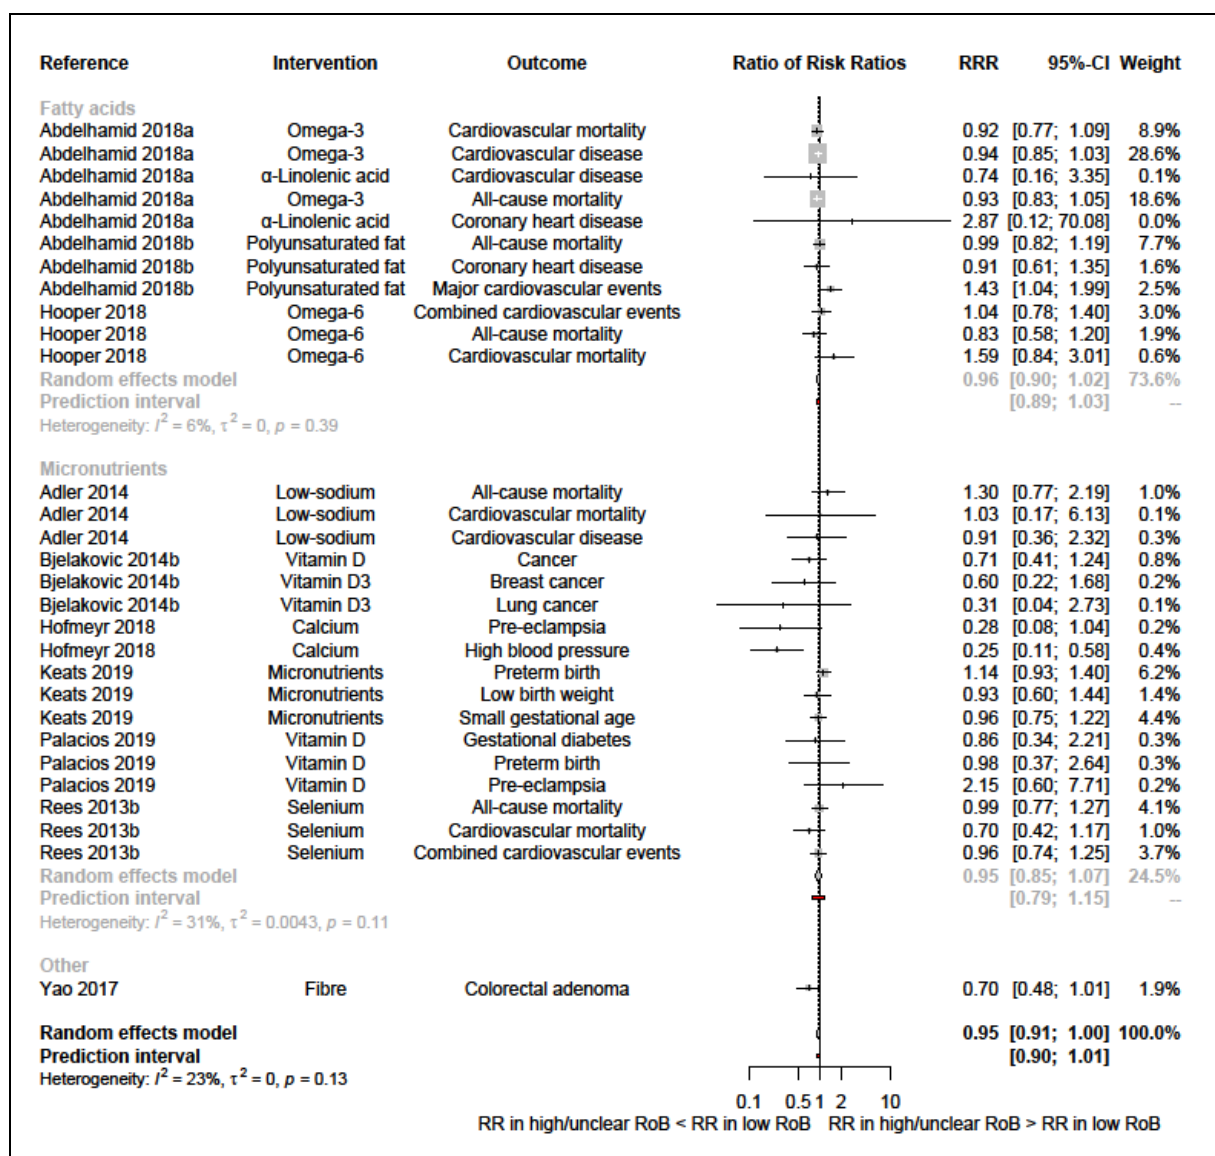

**Figure S23:** Blinding of participants and personnel: Comparisons of randomised controlled trials with high/unclear risk of bias versus those with low risk of bias (reference category) for binary outcomes as pooled ratio of risk ratios. Subgroup analysis: Clusters of interventions  
 CI: confidence interval;  $I^2$ : heterogeneity measure; RoB: risk of bias; RR: risk ratio; RRR: ratio of risk ratios;  $\tau^2$ : heterogeneity value with Restricted Maximum-likelihood estimation method

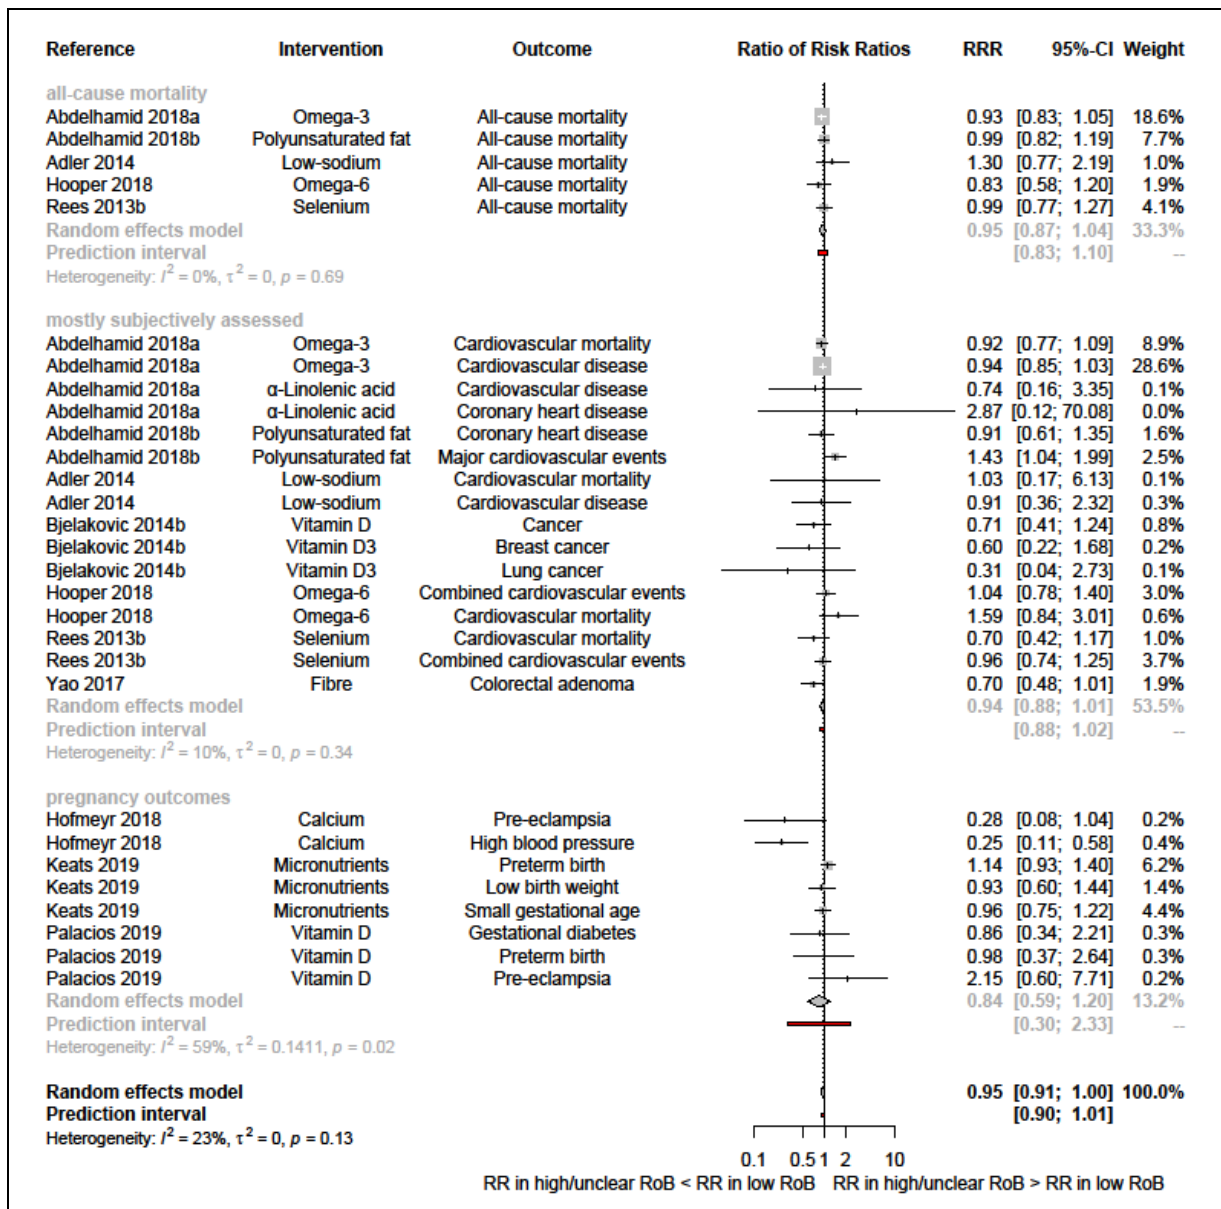

**Figure S24:** Blinding of participants and personnel: Comparisons of randomised controlled trials with high/unclear risk of bias versus those with low risk of bias (reference category) for binary outcomes as pooled ratio of risk ratios. Subgroup analysis: Subjective versus objective outcomes  
 CI: confidence interval;  $I^2$ : heterogeneity measure; RoB: risk of bias; RR: risk ratio; RRR: ratio of risk ratios;  $\tau^2$ : heterogeneity value with Restricted Maximum-likelihood estimation method

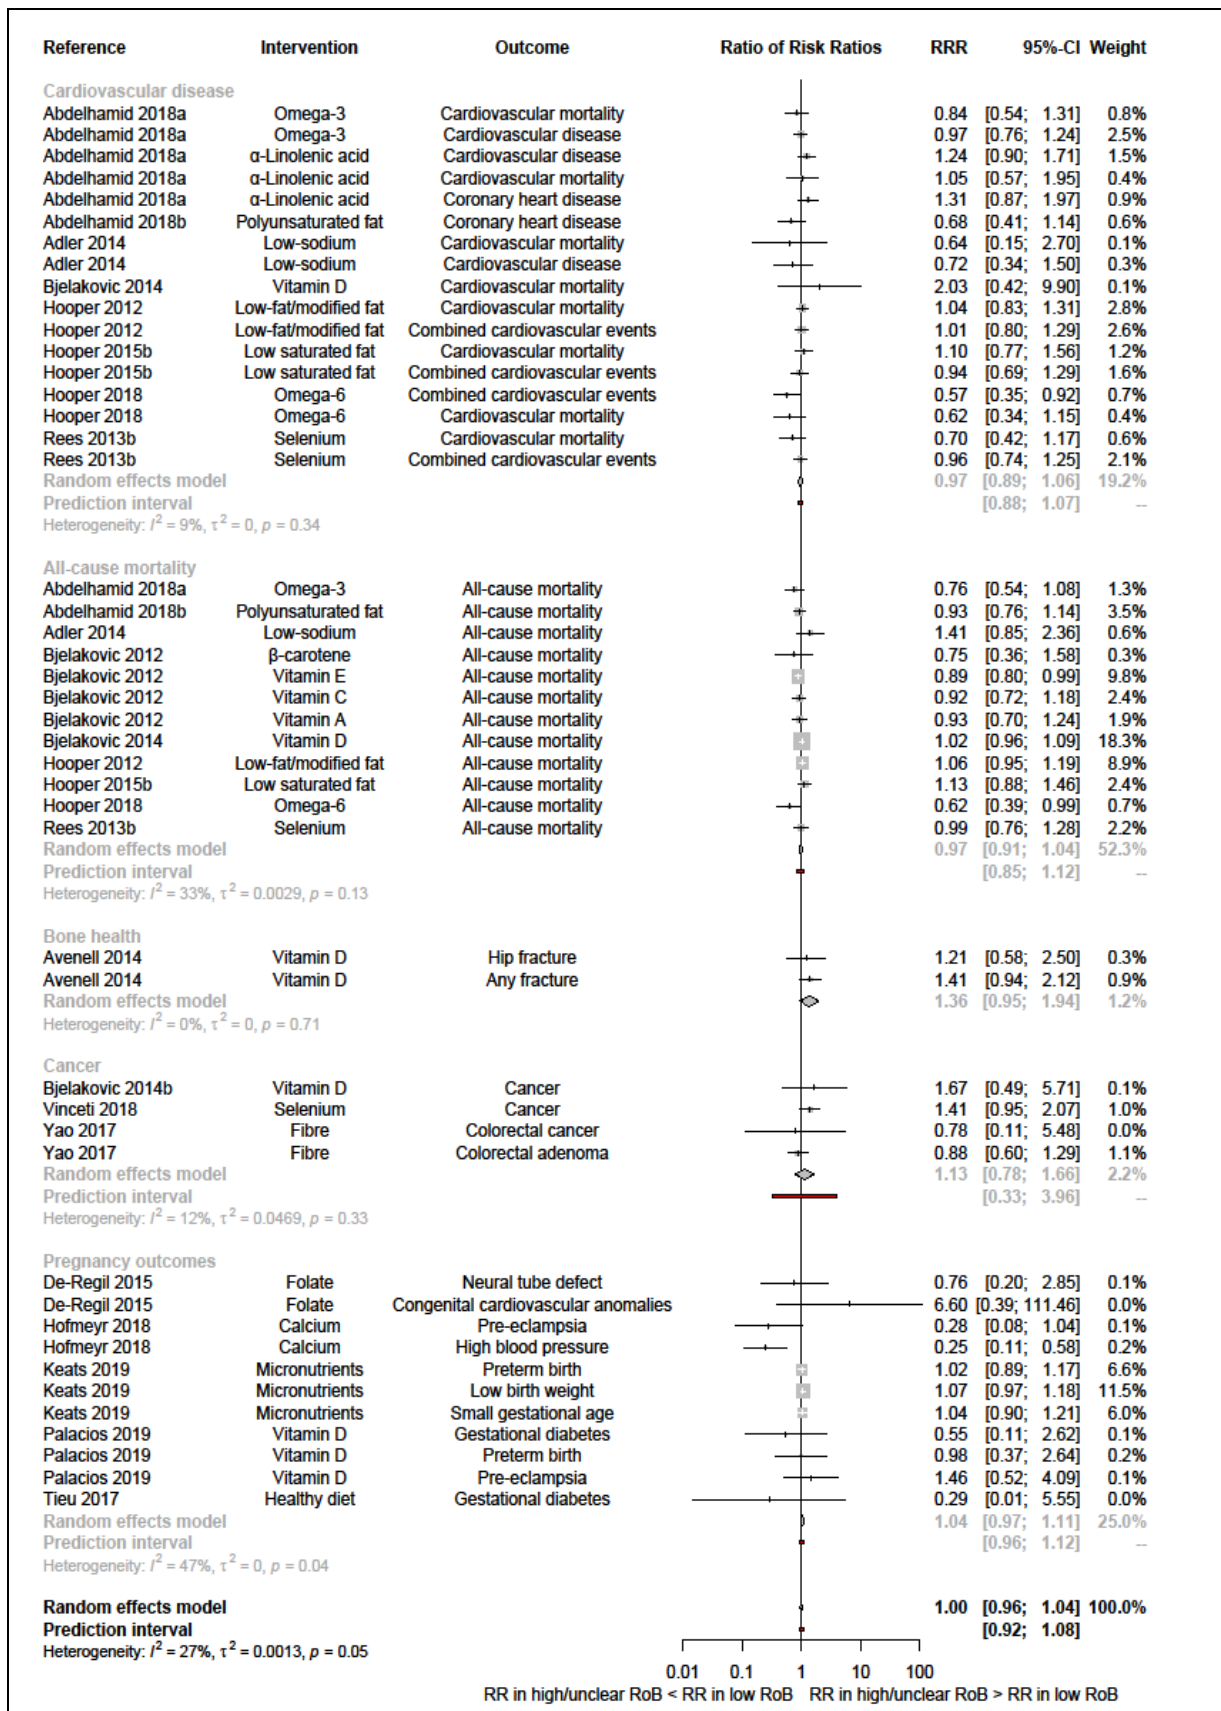

**Figure S25:** Blinding of participants and personnel: Comparisons of randomised controlled trials with high/unclear risk of bias versus those with low risk of bias (reference category) for binary outcomes as pooled ratio of risk ratios. Subgroup analysis: Clusters of outcomes  
 CI: confidence interval;  $I^2$ : heterogeneity measure; RoB: risk of bias; RR: risk ratio; RRR: ratio of risk ratios;  $\tau^2$ : heterogeneity value with Restricted Maximum-likelihood estimation method

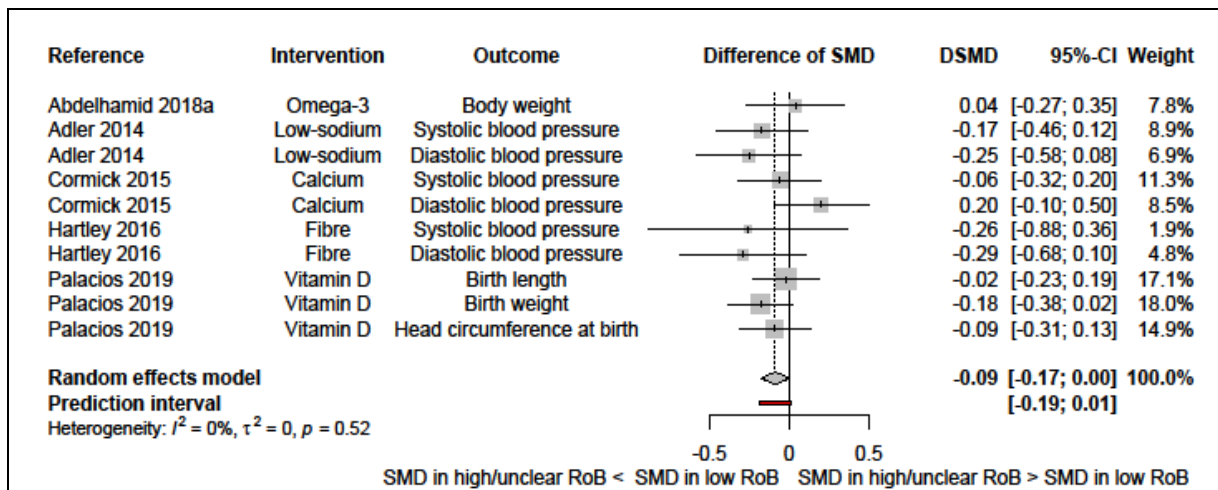

**Figure S26:** Blinding of participants and personnel: Comparisons of randomised controlled trials with high/unclear risk of bias versus those with low risk of bias (reference category) for continuous outcomes as pooled difference of standardised mean differences  
CI: confidence interval; DSMD: difference of standardised mean differences;  $I^2$ : heterogeneity measure; RoB: risk of bias; SMD: standardised mean difference;  $\tau^2$ : heterogeneity value with Restricted Maximum-likelihood estimation method

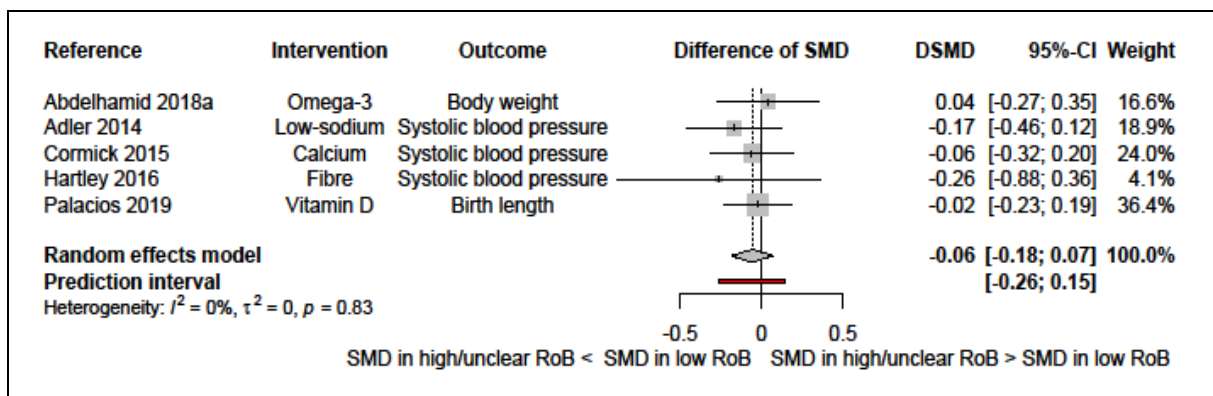

**Figure S27:** Blinding of participants and personnel: Comparisons of randomised controlled trials with high/unclear risk of bias versus those with low risk of bias (reference category) for continuous outcomes as pooled difference of standardised mean differences. Sensitivity analysis: Excluding highly correlated outcomes

CI: confidence interval; DSMD: difference of standardised mean differences;  $I^2$ : heterogeneity measure; RoB: risk of bias; SMD: standardised mean difference;  $\tau^2$ : heterogeneity value with Restricted Maximum-likelihood estimation method

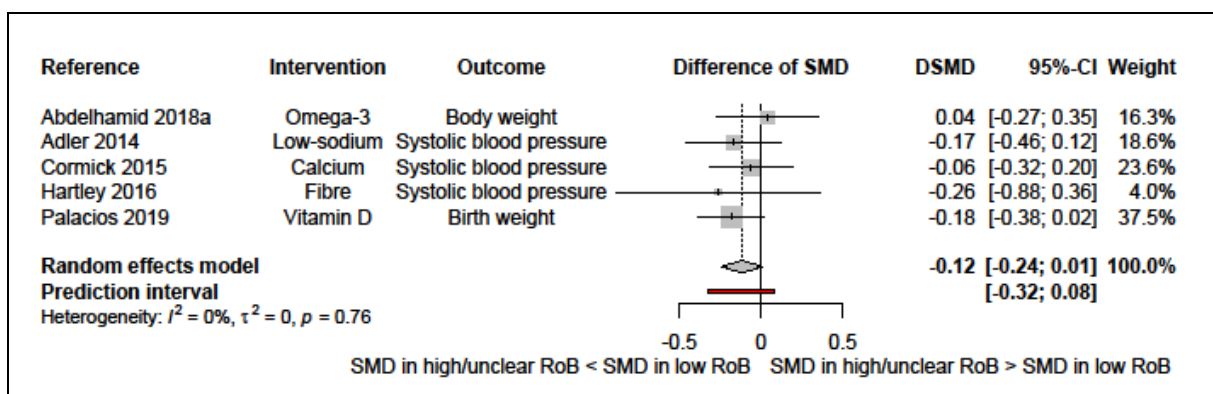

**Figure S28:** Blinding of participants and personnel: Comparisons of randomised controlled trials with high/unclear risk of bias versus those with low risk of bias (reference category) for continuous outcomes as pooled difference of standardised mean differences. Sensitivity analysis: Including only one outcome per comparison from each included systematic review

CI: confidence interval; DSMD: difference of standardised mean differences;  $I^2$ : heterogeneity measure; RoB: risk of bias; SMD: standardised mean difference;  $\tau^2$ : heterogeneity value with Restricted Maximum-likelihood estimation method



## Methodological trial characteristic: Blinding of outcome assessment

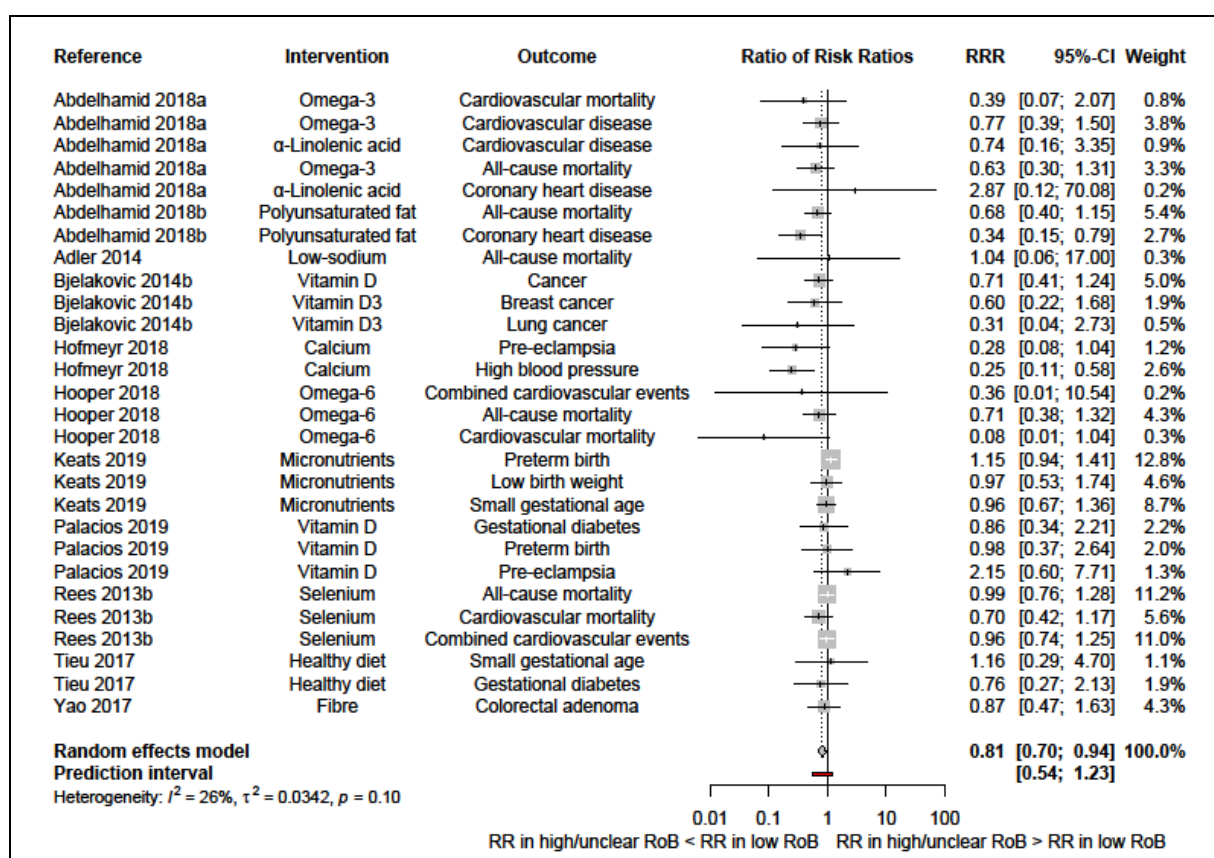

**Figure S29:** Blinding of outcome assessment: Comparisons of randomised controlled trials with high/unclear risk of bias versus those with low risk of bias (reference category) for binary outcomes as pooled ratio of risk ratios

CI: confidence interval;  $I^2$ : heterogeneity measure; RoB: risk of bias; RR: risk ratio; RRR: ratio of risk ratios;  $\tau^2$ : heterogeneity value with Restricted Maximum-likelihood estimation method

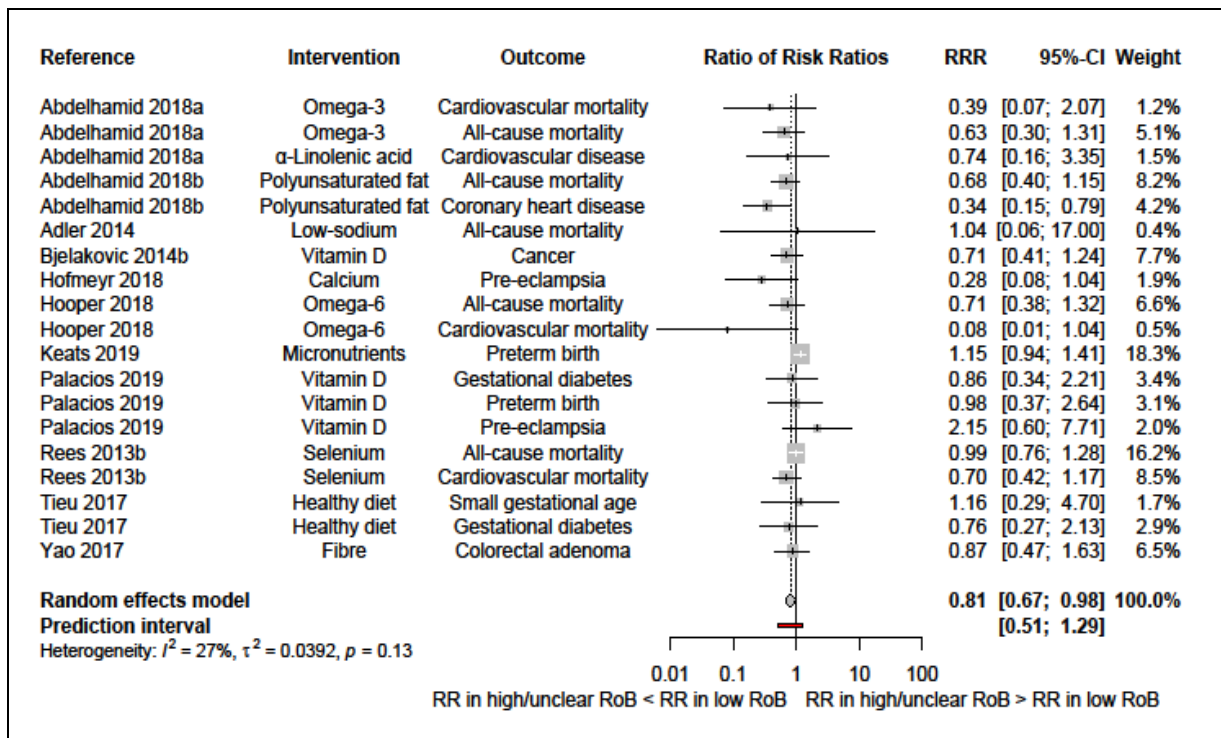

**Figure S30:** Blinding of outcome assessment: Comparisons of randomised controlled trials with high/unclear risk of bias versus those with low risk of bias (reference category) for binary outcomes as pooled ratio of risk ratios. Sensitivity analysis: Excluding highly correlated outcomes  
CI: confidence interval;  $I^2$ : heterogeneity measure; RoB: risk of bias; RR: risk ratio; RRR: ratio of risk ratios;  $\tau^2$ : heterogeneity value with Restricted Maximum-likelihood estimation method

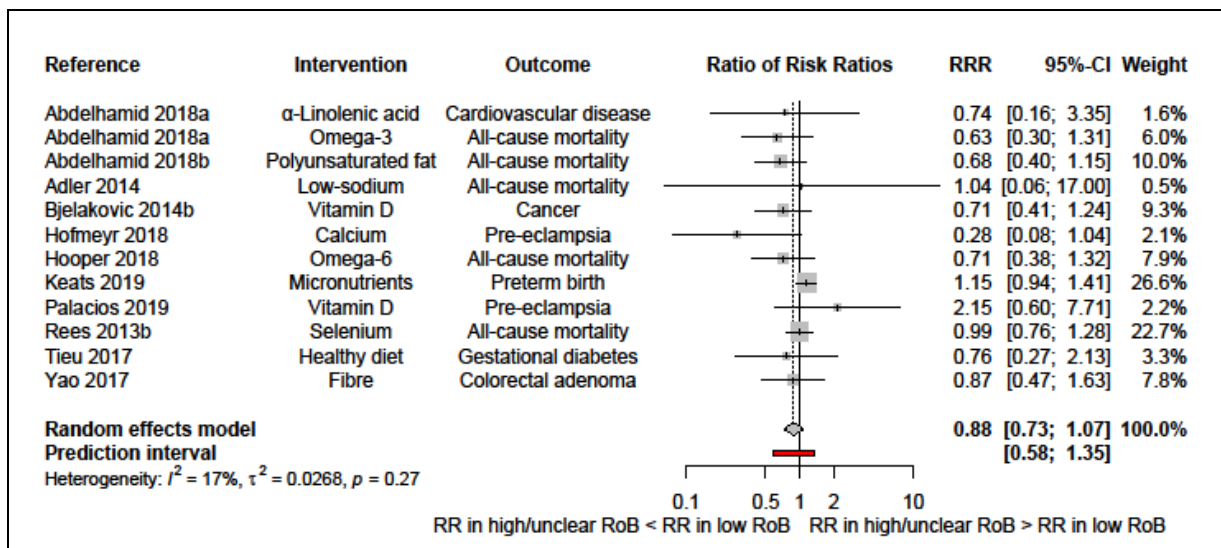

**Figure S31:** Blinding of outcome assessment: Comparisons of randomised controlled trials with high/unclear risk of bias versus those with low risk of bias (reference category) for binary outcomes as pooled ratio of risk ratios. Sensitivity analysis: Including only one outcome per comparison from each included systematic review  
CI: confidence interval;  $I^2$ : heterogeneity measure; RoB: risk of bias; RR: risk ratio; RRR: ratio of risk ratios;  $\tau^2$ : heterogeneity value with Restricted Maximum-likelihood estimation method

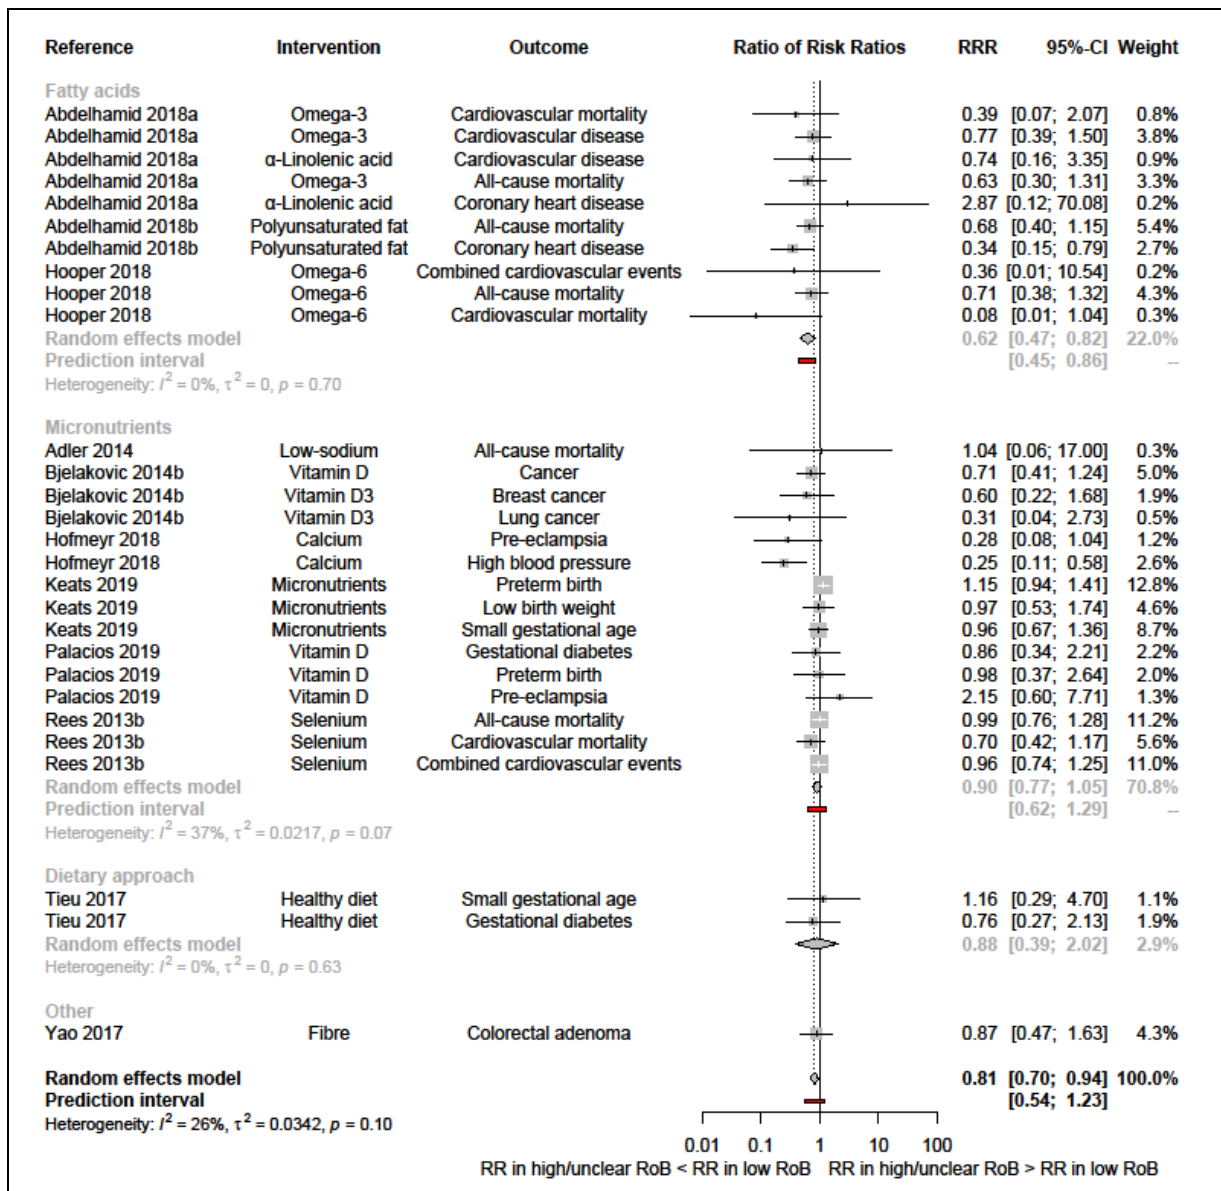

**Figure S32:** Blinding of outcome assessment: Comparisons of randomised controlled trials with high/unclear risk of bias versus those with low risk of bias (reference category) for binary outcomes as pooled ratio of risk ratios. Subgroup analysis: Clusters of interventions  
 CI: confidence interval;  $I^2$ : heterogeneity measure; RoB: risk of bias; RR: risk ratio; RRR: ratio of risk ratios;  $\tau^2$ : heterogeneity value with Restricted Maximum-likelihood estimation method



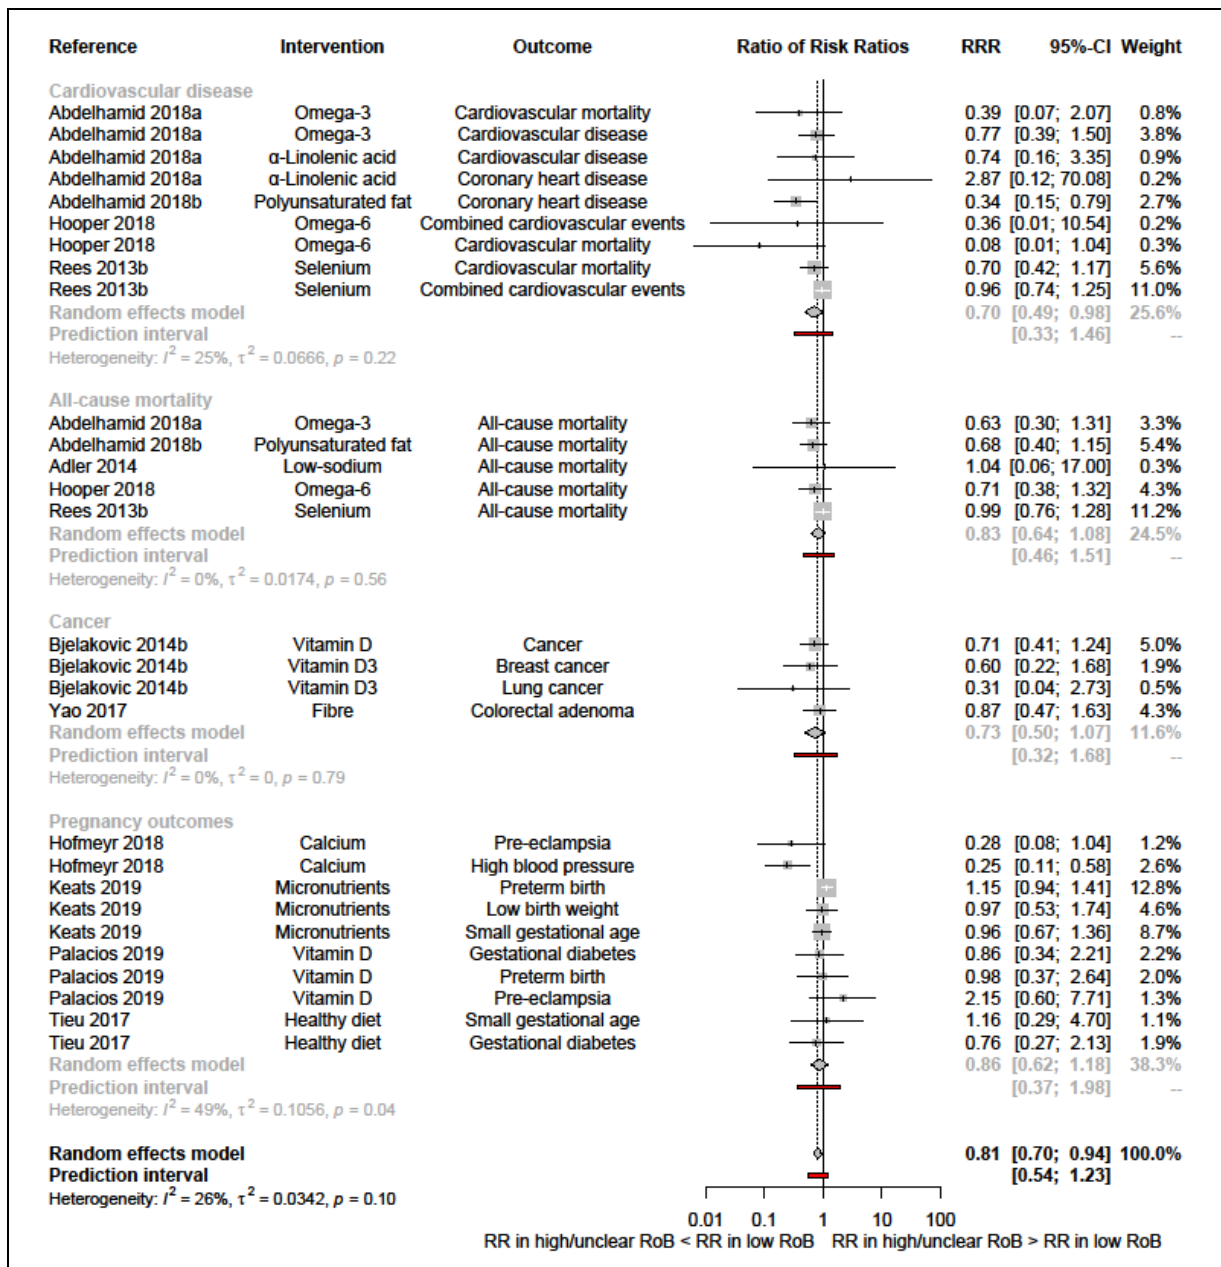

**Figure S33:** Blinding of outcome assessment: Comparisons of randomised controlled trials with high/unclear risk of bias versus those with low risk of bias (reference category) for binary outcomes as pooled ratio of risk ratios. Subgroup analysis: Clusters of outcomes  
 CI: confidence interval;  $I^2$ : heterogeneity measure; RoB: risk of bias; RR: risk ratio; RRR: ratio of risk ratios;  $\tau^2$ : heterogeneity value with Restricted Maximum-likelihood estimation method

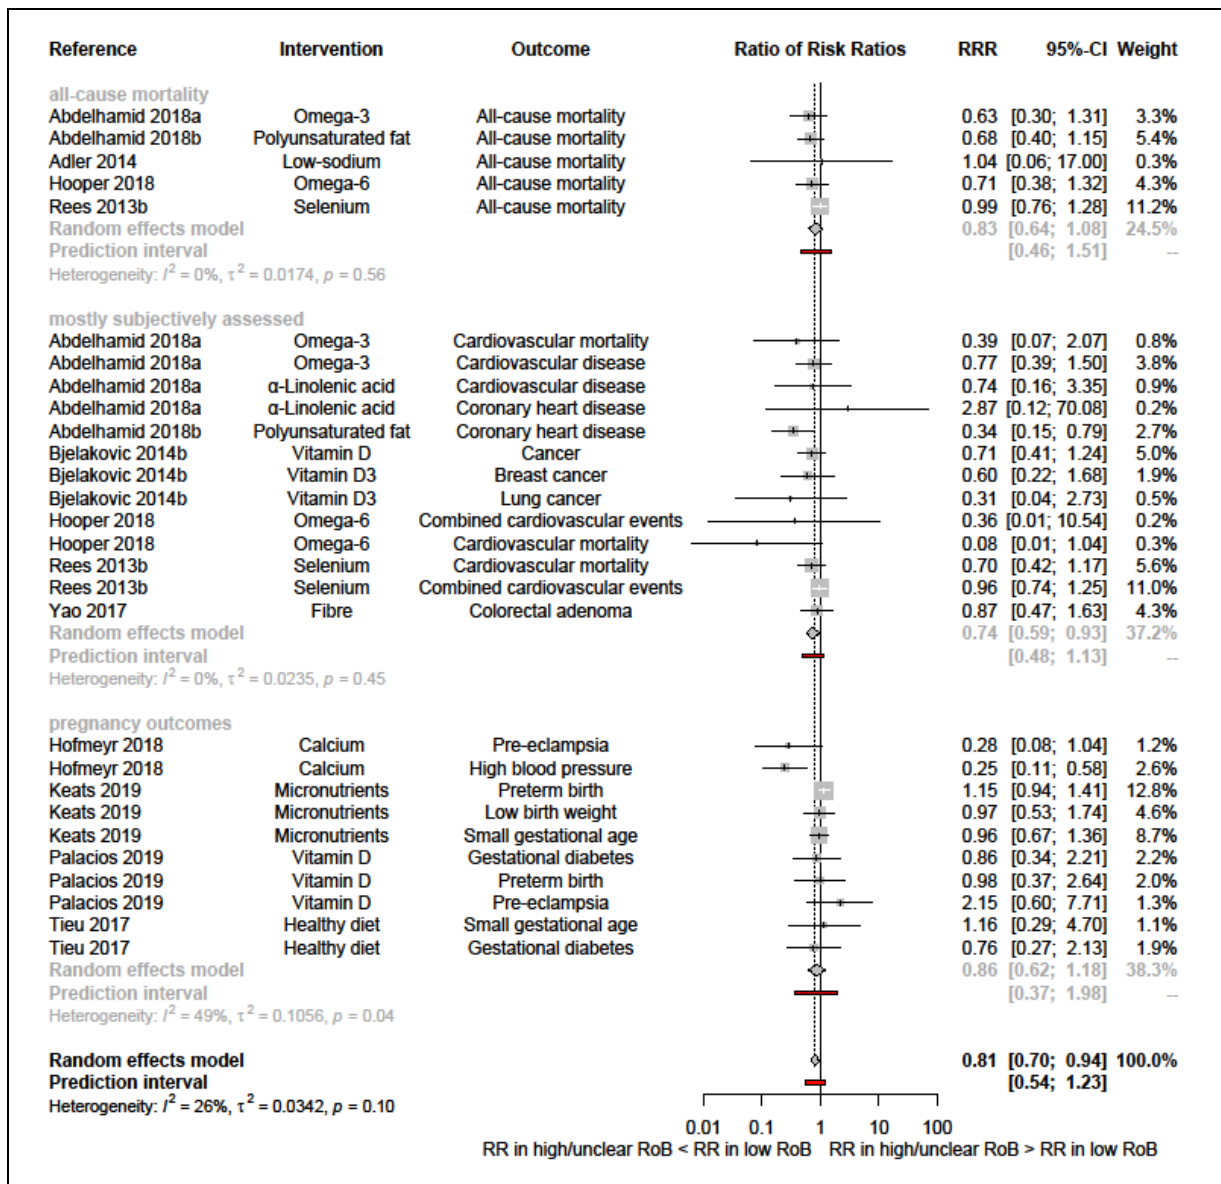

**Figure S34:** Blinding of outcome assessment: Comparisons of randomised controlled trials with high/unclear risk of bias versus those with low risk of bias (reference category) for binary outcomes as pooled ratio of risk ratios. Subgroup analysis: Subjective versus objective outcomes  
 CI: confidence interval;  $I^2$ : heterogeneity measure; RoB: risk of bias; RR: risk ratio; RRR: ratio of risk ratios;  $\tau^2$ : heterogeneity value with Restricted Maximum-likelihood estimation method

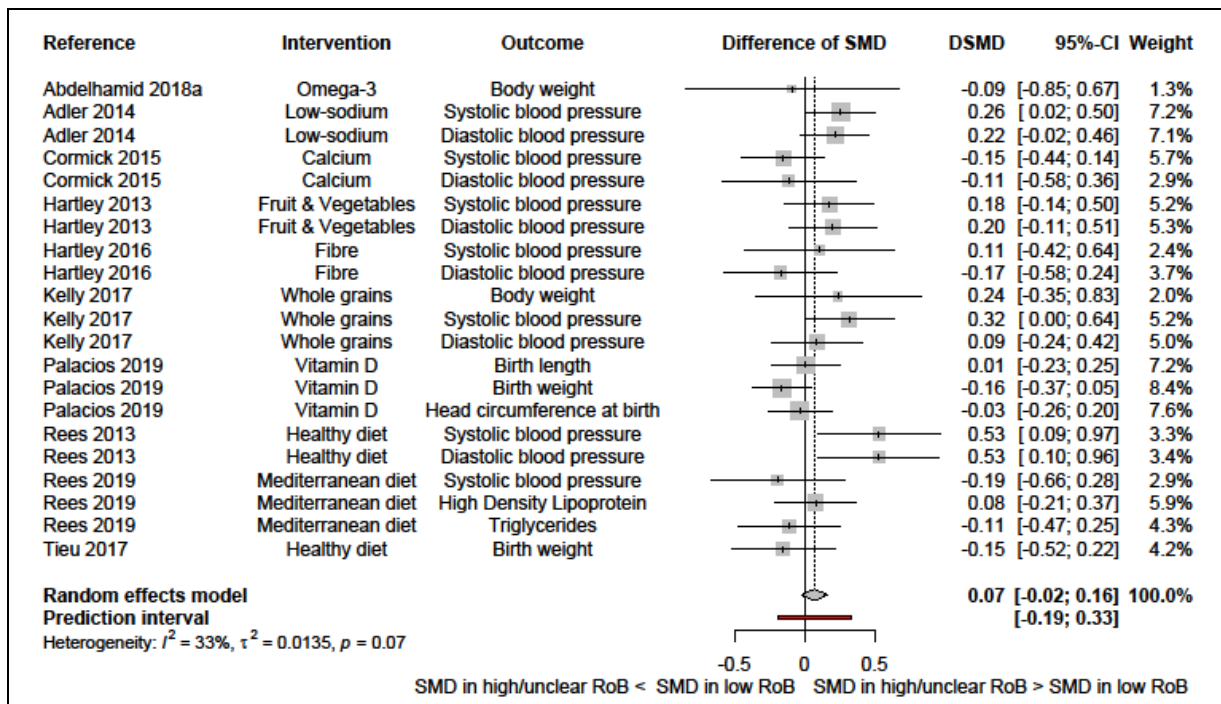

**Figure S35:** Blinding of outcome assessment: Comparisons of randomised controlled trials with high/unclear risk of bias versus those with low risk of bias (reference category) for continuous outcomes as pooled difference of standardised mean differences

CI: confidence interval; DSMD: difference of standardised mean differences;  $I^2$ : heterogeneity measure; RoB: risk of bias; SMD: standardised mean difference;  $\tau^2$ : heterogeneity value with Restricted Maximum-likelihood estimation method

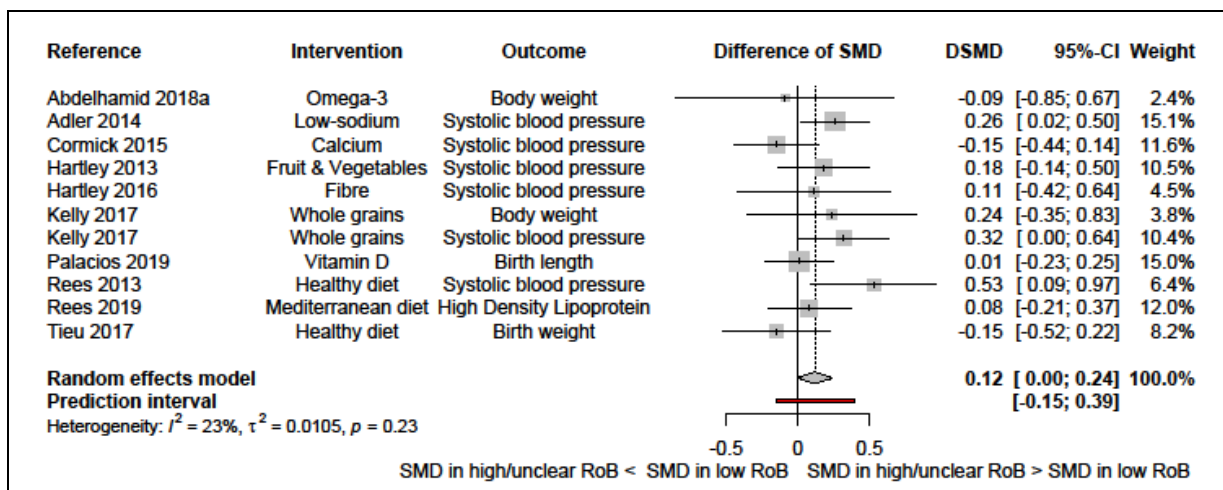

**Figure S36:** Blinding of outcome assessment: Comparisons of randomised controlled trials with high/unclear risk of bias versus those with low risk of bias (reference category) for continuous outcomes as pooled difference of standardised mean differences. Sensitivity analysis: Excluding highly correlated outcomes

CI: confidence interval; DSMD: difference of standardised mean differences;  $I^2$ : heterogeneity measure; RoB: risk of bias; SMD: standardised mean difference;  $\tau^2$ : heterogeneity value with Restricted Maximum-likelihood estimation method

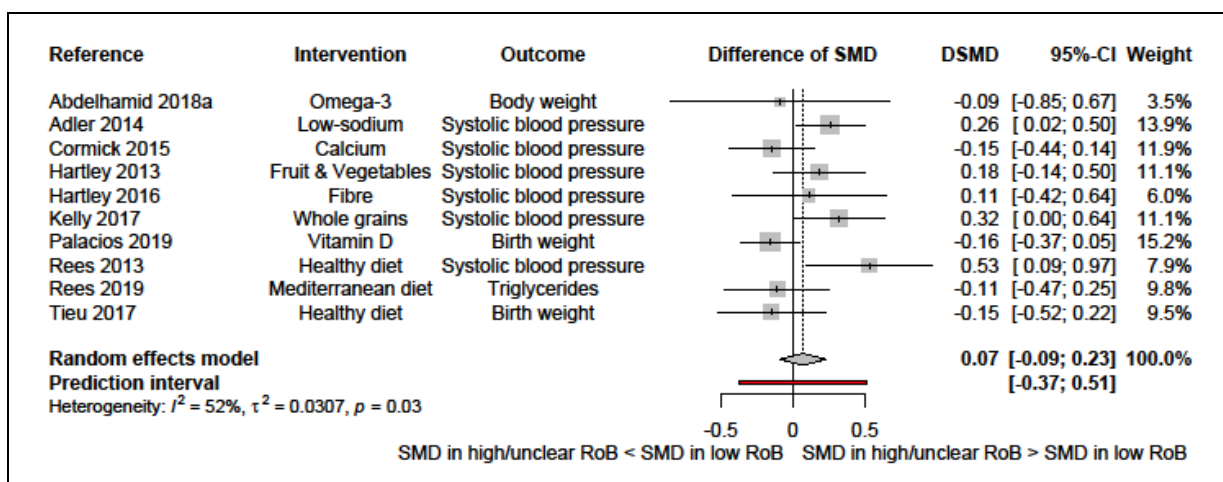

**Figure S37:** Blinding of outcome assessment: Comparisons of randomised controlled trials with high/unclear risk of bias versus those with low risk of bias (reference category) for continuous outcomes as pooled difference of standardised mean differences. Sensitivity analysis: Including only one outcome per comparison from each included systematic review

CI: confidence interval; DSMD: difference of standardised mean differences;  $I^2$ : heterogeneity measure; RoB: risk of bias; SMD: standardised mean difference;  $\tau^2$ : heterogeneity value with Restricted Maximum-likelihood estimation method

**Methodological trial characteristic: Incomplete outcome data**

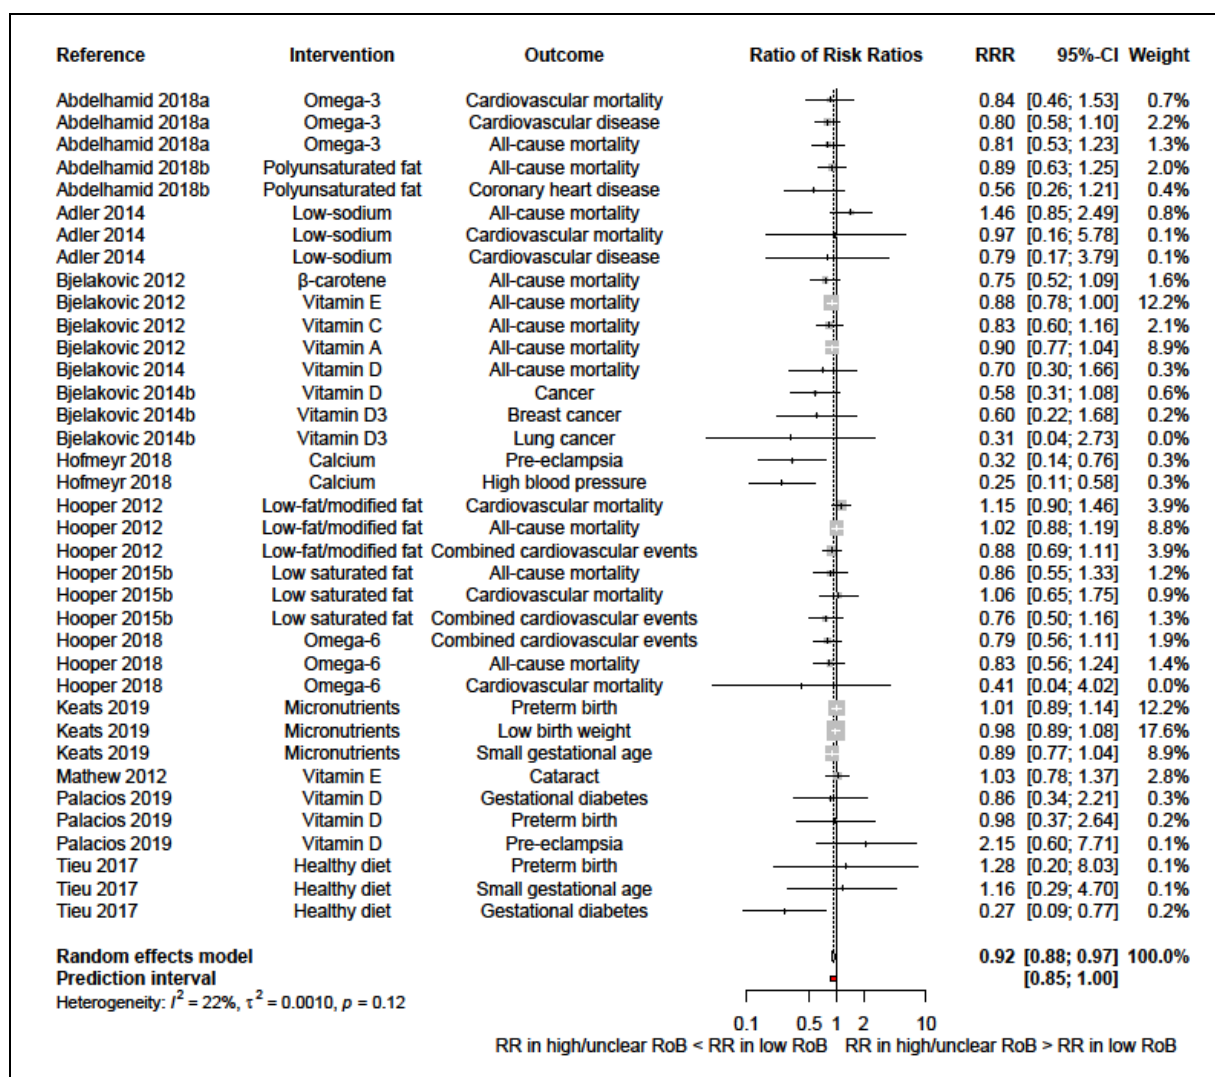

**Figure S38:** Incomplete outcome data: Comparisons of randomised controlled trials with high/unclear risk of bias versus those with low risk of bias (reference category) for binary outcomes as pooled ratio of risk ratios

CI: confidence interval;  $I^2$ : heterogeneity measure; RoB: risk of bias; RR: risk ratio; RRR: ratio of risk ratios;  $\tau^2$ : heterogeneity value with Restricted Maximum-likelihood estimation method



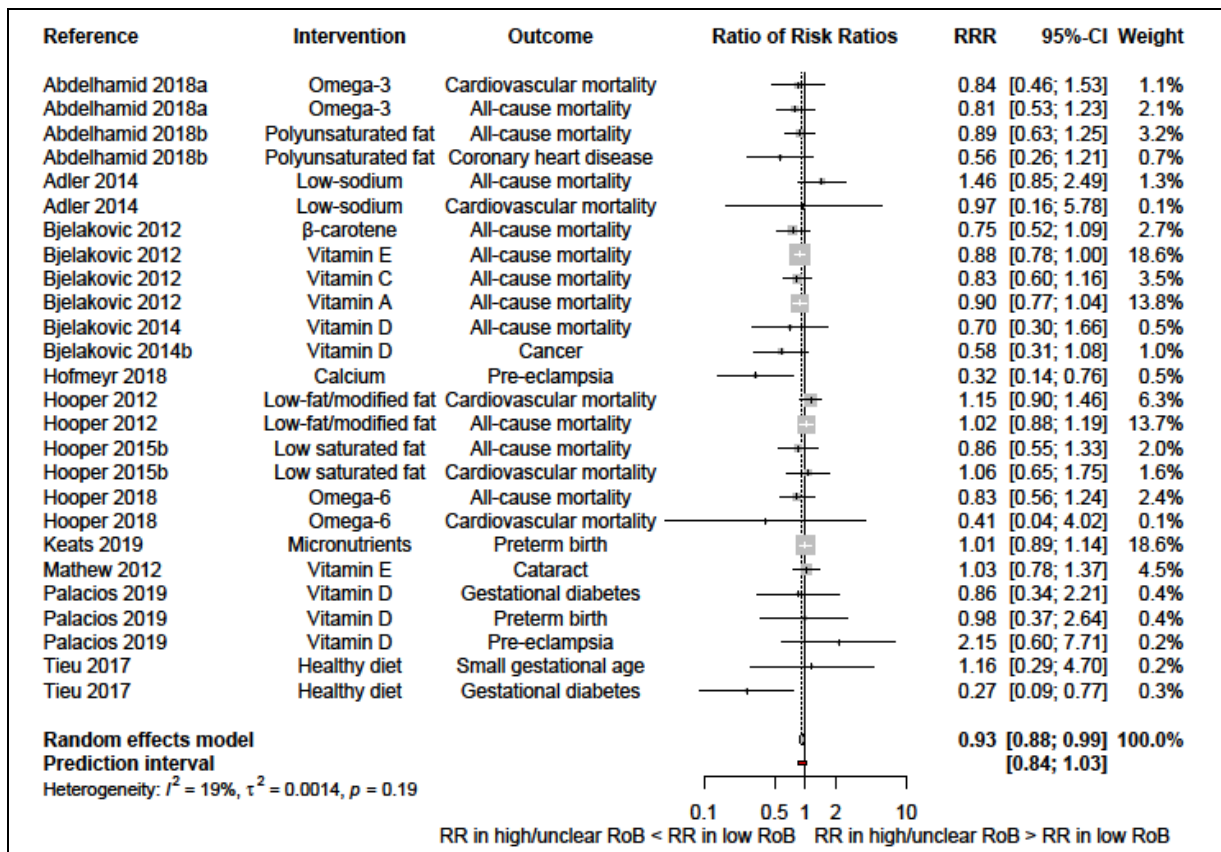

**Figure S39:** Incomplete outcome data: Comparisons of randomised controlled trials with high/unclear risk of bias versus those with low risk of bias (reference category) for binary outcomes as pooled ratio of risk ratios. Sensitivity analysis: Excluding highly correlated outcomes  
 CI: confidence interval;  $I^2$ : heterogeneity measure; RoB: risk of bias; RR: risk ratio; RRR: ratio of risk ratios;  $\tau^2$ : heterogeneity value with Restricted Maximum-likelihood estimation method

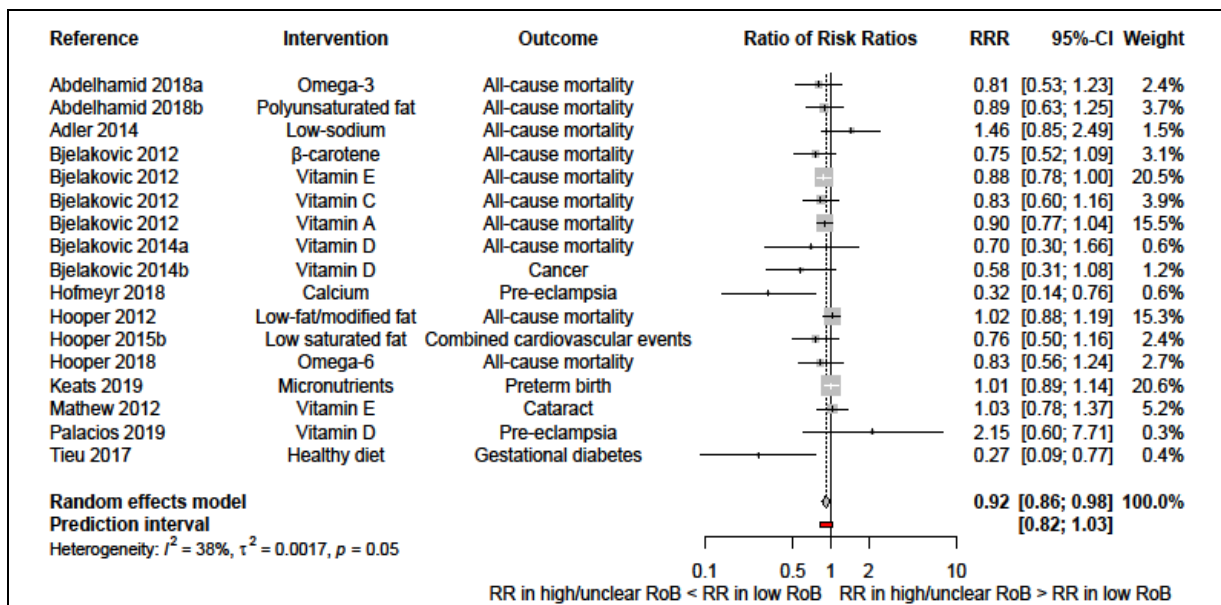

**Figure S40:** Incomplete outcome data: Comparisons of randomised controlled trials with high/unclear risk of bias versus those with low risk of bias (reference category) for binary outcomes as pooled ratio of risk ratios. Sensitivity analysis: Including only one outcome per comparison from each included systematic review  
 CI: confidence interval;  $I^2$ : heterogeneity measure; RoB: risk of bias; RR: risk ratio; RRR: ratio of risk ratios;  $\tau^2$ : heterogeneity value with Restricted Maximum-likelihood estimation method

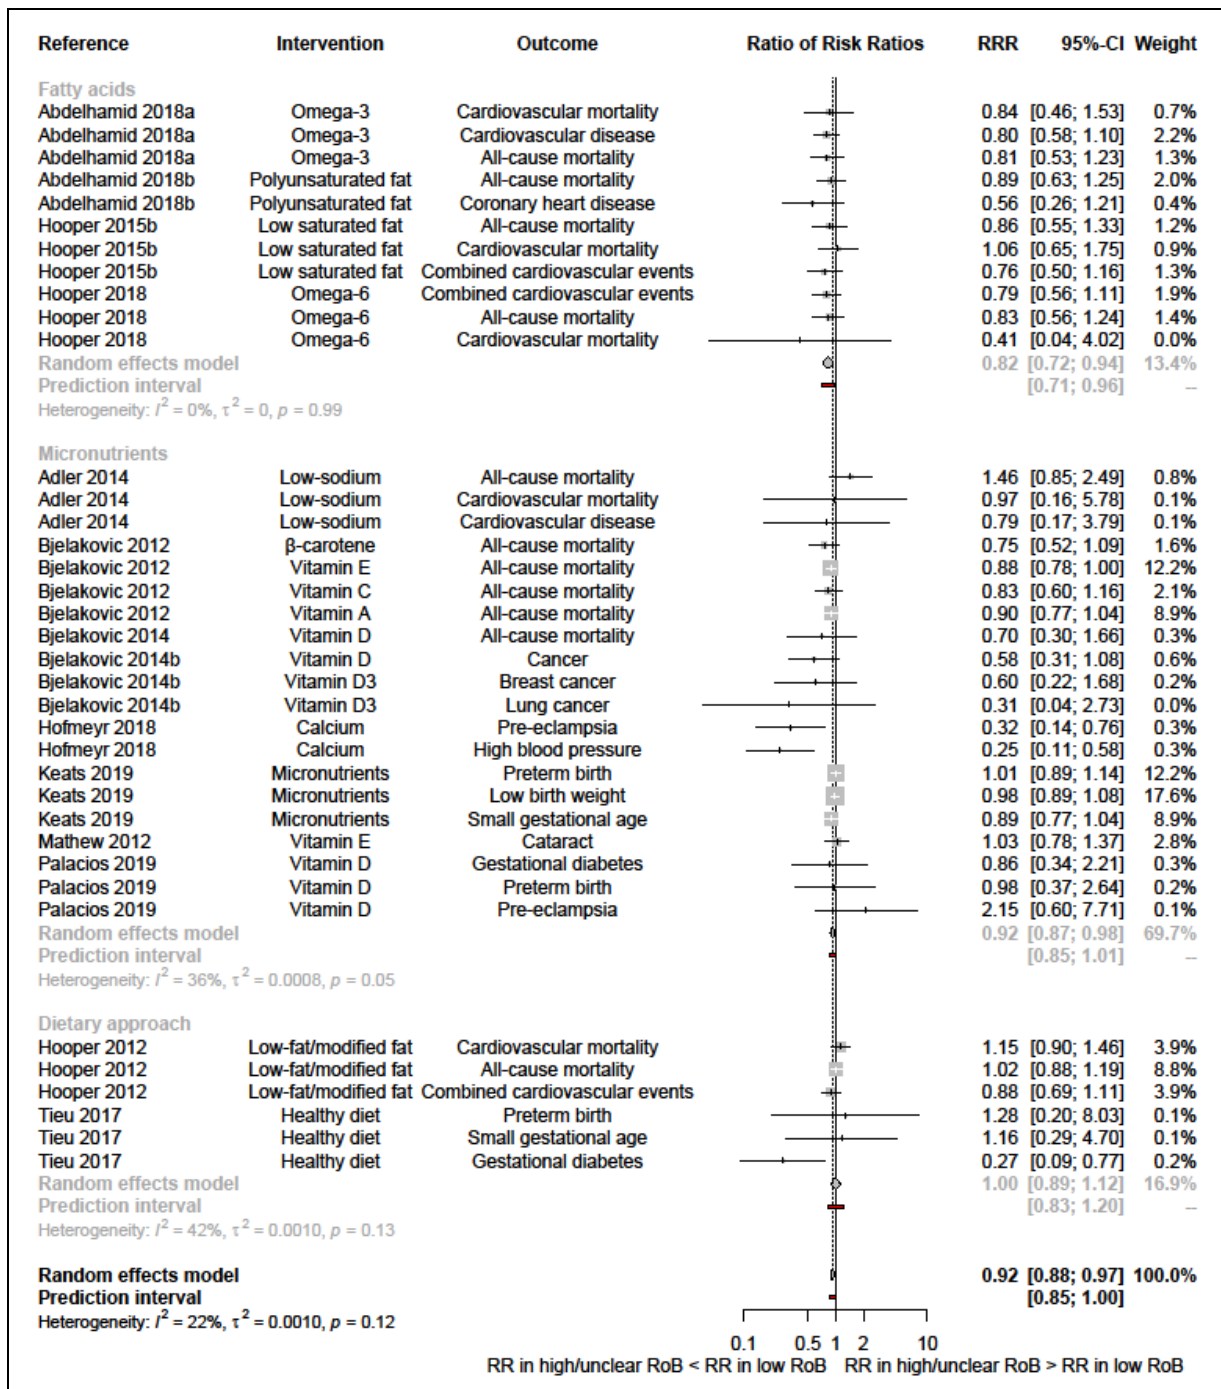

**Figure S41:** Incomplete outcome data: Comparisons of randomised controlled trials with high/unclear risk of bias versus those with low risk of bias (reference category) for binary outcomes as pooled ratio of risk ratios. Subgroup analysis: Clusters of interventions  
 CI: confidence interval;  $I^2$ : heterogeneity measure; RoB: risk of bias; RR: risk ratio; RRR: ratio of risk ratios;  $\tau^2$ : heterogeneity value with Restricted Maximum-likelihood estimation method

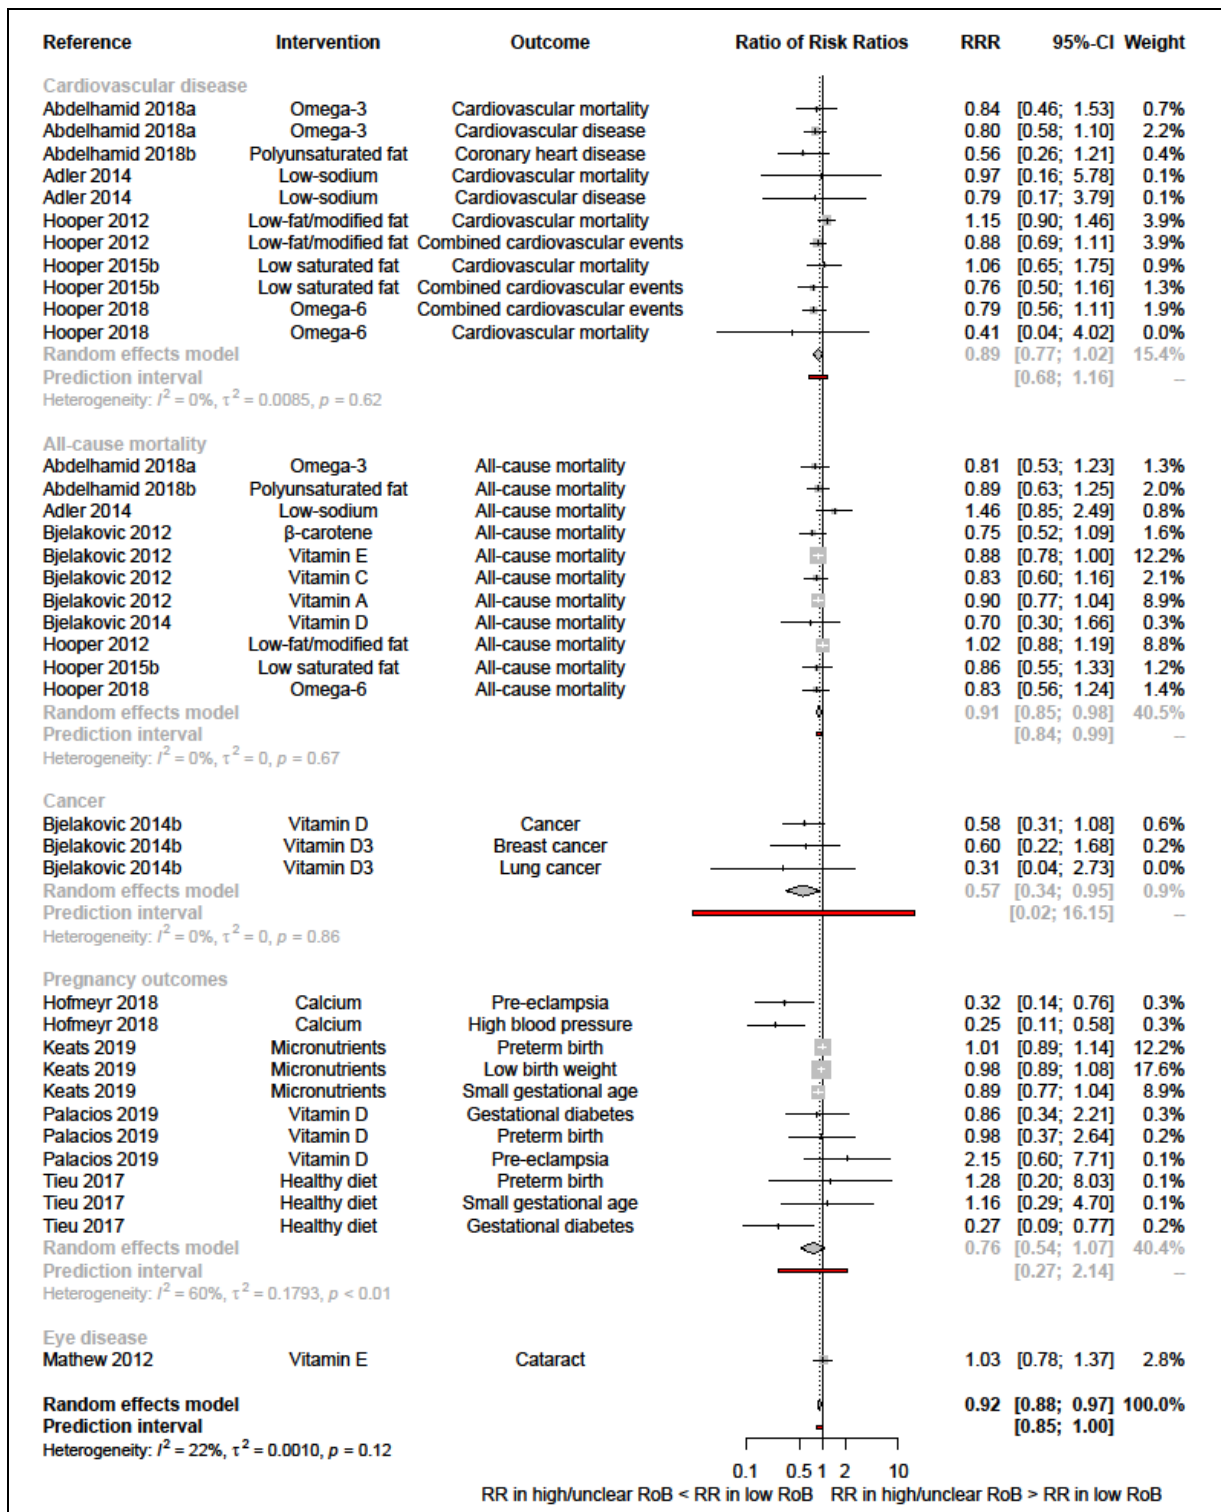

**Figure S42:** Incomplete outcome data: Comparisons of randomised controlled trials with high/unclear risk of bias versus those with low risk of bias (reference category) for binary outcomes as pooled ratio of risk ratios. Subgroup analysis: Clusters of outcomes  
 CI: confidence interval;  $I^2$ : heterogeneity measure; RoB: risk of bias; RR: risk ratio; RRR: ratio of risk ratios;  $\tau^2$ : heterogeneity value with Restricted Maximum-likelihood estimation method



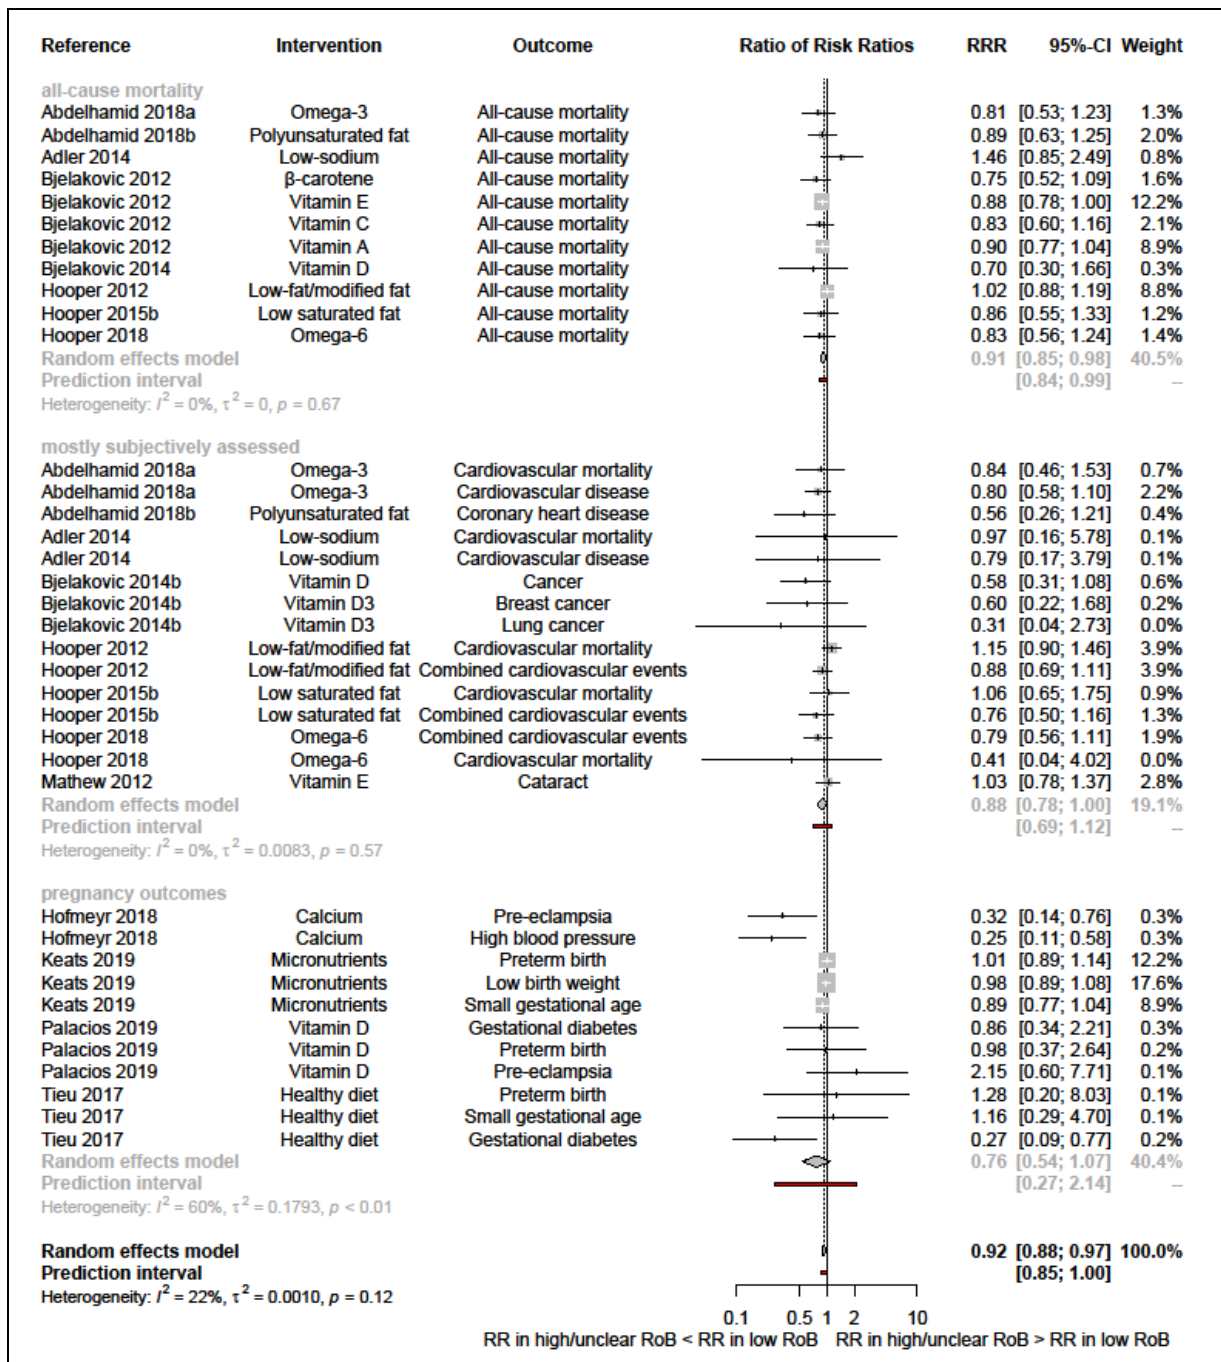

**Figure S43:** Incomplete outcome data: Comparisons of randomised controlled trials with high/unclear risk of bias versus those with low risk of bias (reference category) for binary outcomes as pooled ratio of risk ratios. Subgroup analysis: Subjective versus objective outcomes  
 CI: confidence interval;  $I^2$ : heterogeneity measure; RoB: risk of bias; RR: risk ratio; RRR: ratio of risk ratios;  $\tau^2$ : heterogeneity value with Restricted Maximum-likelihood estimation method

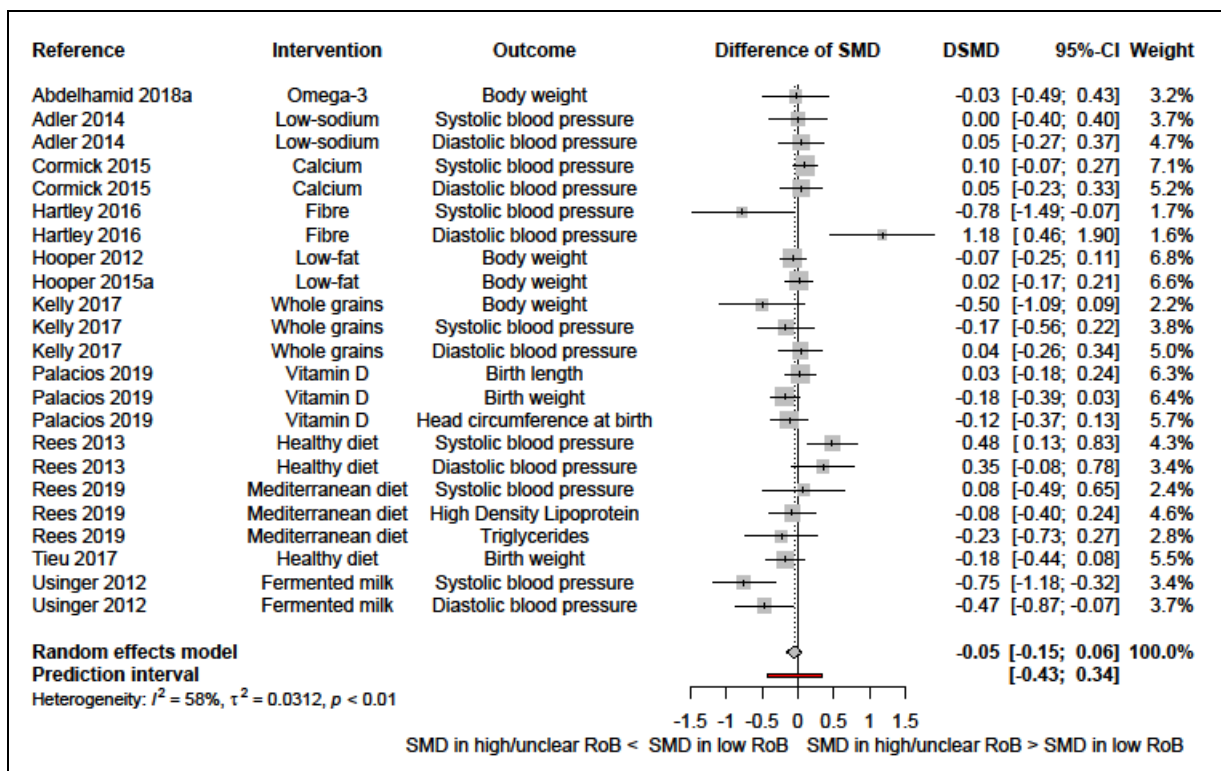

**Figure S44:** Incomplete outcome data: Comparisons of randomised controlled trials with high/unclear risk of bias versus those with low risk of bias (reference category) for continuous outcomes as pooled difference of standardised mean differences

CI: confidence interval; DSMD: difference of standardised mean differences;  $I^2$ : heterogeneity measure; RoB: risk of bias; SMD: standardised mean difference;  $\tau^2$ : heterogeneity value with Restricted Maximum-likelihood estimation method

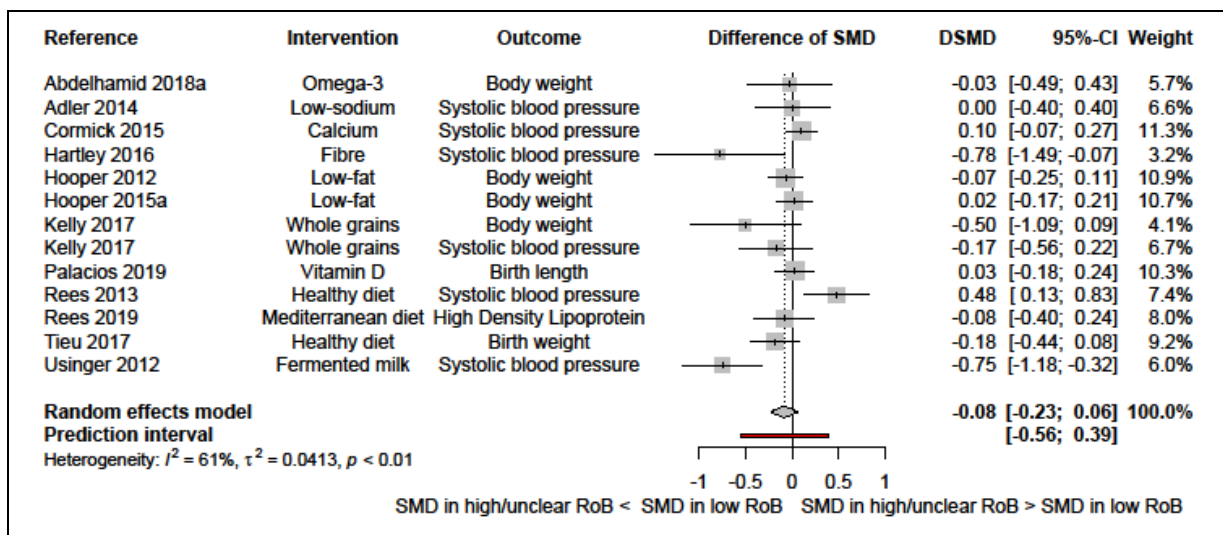

**Figure S45:** Incomplete outcome data: Comparisons of randomised controlled trials with high/unclear risk of bias versus those with low risk of bias (reference category) for continuous outcomes as pooled difference of standardised mean differences. Sensitivity analysis: Excluding highly correlated outcomes

CI: confidence interval; DSMD: difference of standardised mean differences;  $I^2$ : heterogeneity measure; RoB: risk of bias; SMD: standardised mean difference;  $\tau^2$ : heterogeneity value with Restricted Maximum-likelihood estimation method

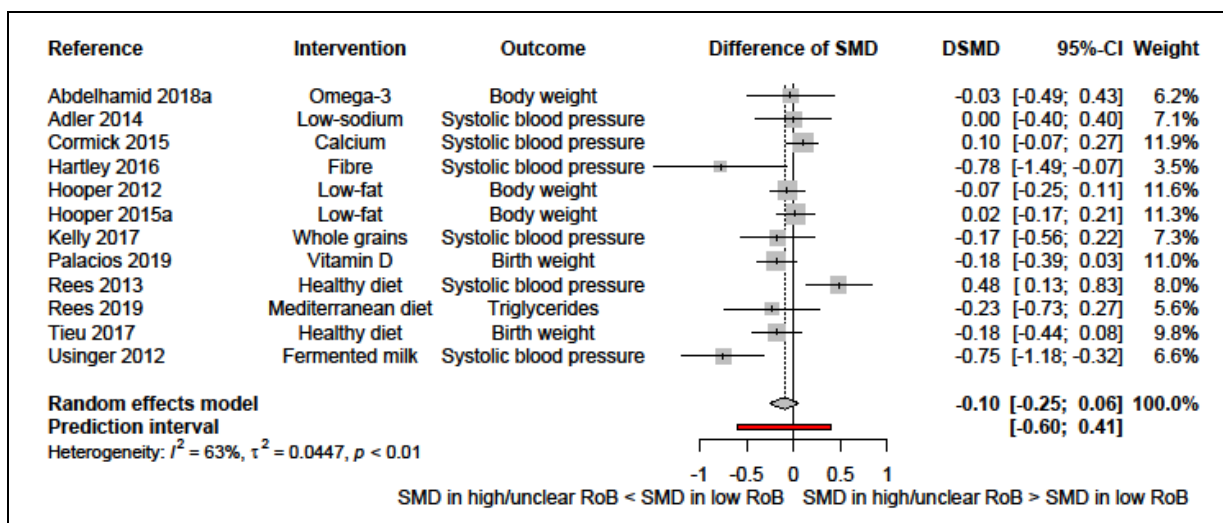

**Figure S46:** Incomplete outcome data: Comparisons of randomised controlled trials with high/unclear risk of bias versus those with low risk of bias (reference category) for continuous outcomes as pooled difference of standardised mean differences. Sensitivity analysis: Including only one outcome per comparison from each included systematic review

CI: confidence interval; DSMD: difference of standardised mean differences;  $I^2$ : heterogeneity measure; RoB: risk of bias; SMD: standardised mean difference;  $\tau^2$ : heterogeneity value with Restricted Maximum-likelihood estimation method

## Methodological trial characteristic: Selective Reporting

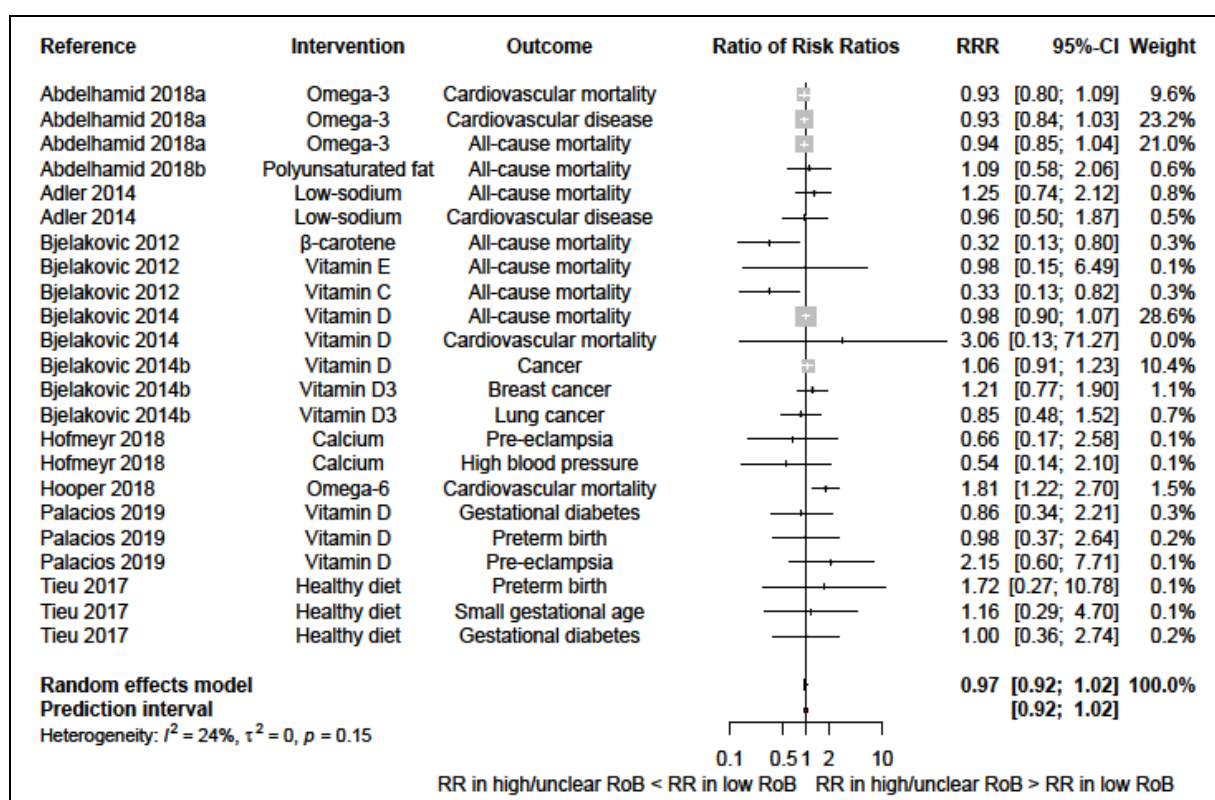

**Figure S47:** Selective Reporting: Comparisons of randomised controlled trials with high/unclear risk of bias versus those with low risk of bias (reference category) for binary outcomes as pooled ratio of risk ratios

CI: confidence interval;  $I^2$ : heterogeneity measure; RoB: risk of bias; RR: risk ratio; RRR: ratio of risk ratios;  $\tau^2$ : heterogeneity value with Restricted Maximum-likelihood estimation method

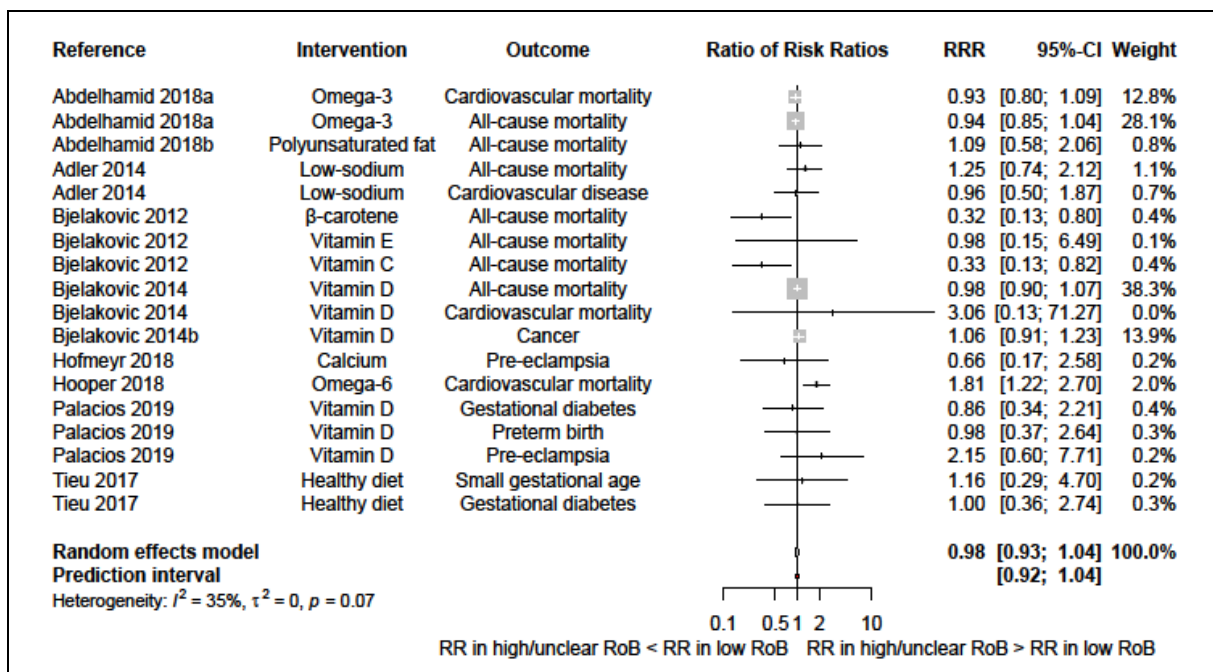

**Figure S48:** Selective Reporting: Comparisons of randomised controlled trials with high/unclear risk of bias versus those with low risk of bias (reference category) for binary outcomes as pooled ratio of risk ratios. Sensitivity analysis: Excluding highly correlated outcomes  
 CI: confidence interval;  $I^2$ : heterogeneity measure; RoB: risk of bias; RR: risk ratio; RRR: ratio of risk ratios;  $\tau^2$ : heterogeneity value with Restricted Maximum-likelihood estimation method

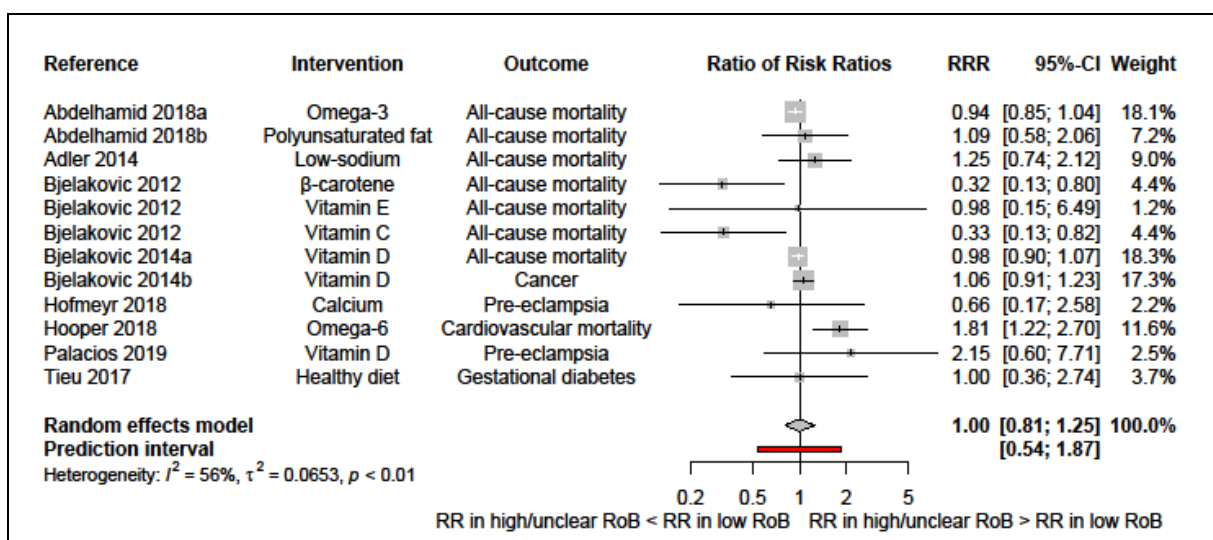

**Figure S49:** Selective Reporting: Comparisons of randomised controlled trials with high/unclear risk of bias versus those with low risk of bias (reference category) for binary outcomes as pooled ratio of risk ratios. Sensitivity analysis: Including only one outcome per comparison from each included systematic review  
 CI: confidence interval;  $I^2$ : heterogeneity measure; RoB: risk of bias; RR: risk ratio; RRR: ratio of risk ratios;  $\tau^2$ : heterogeneity value with Restricted Maximum-likelihood estimation method



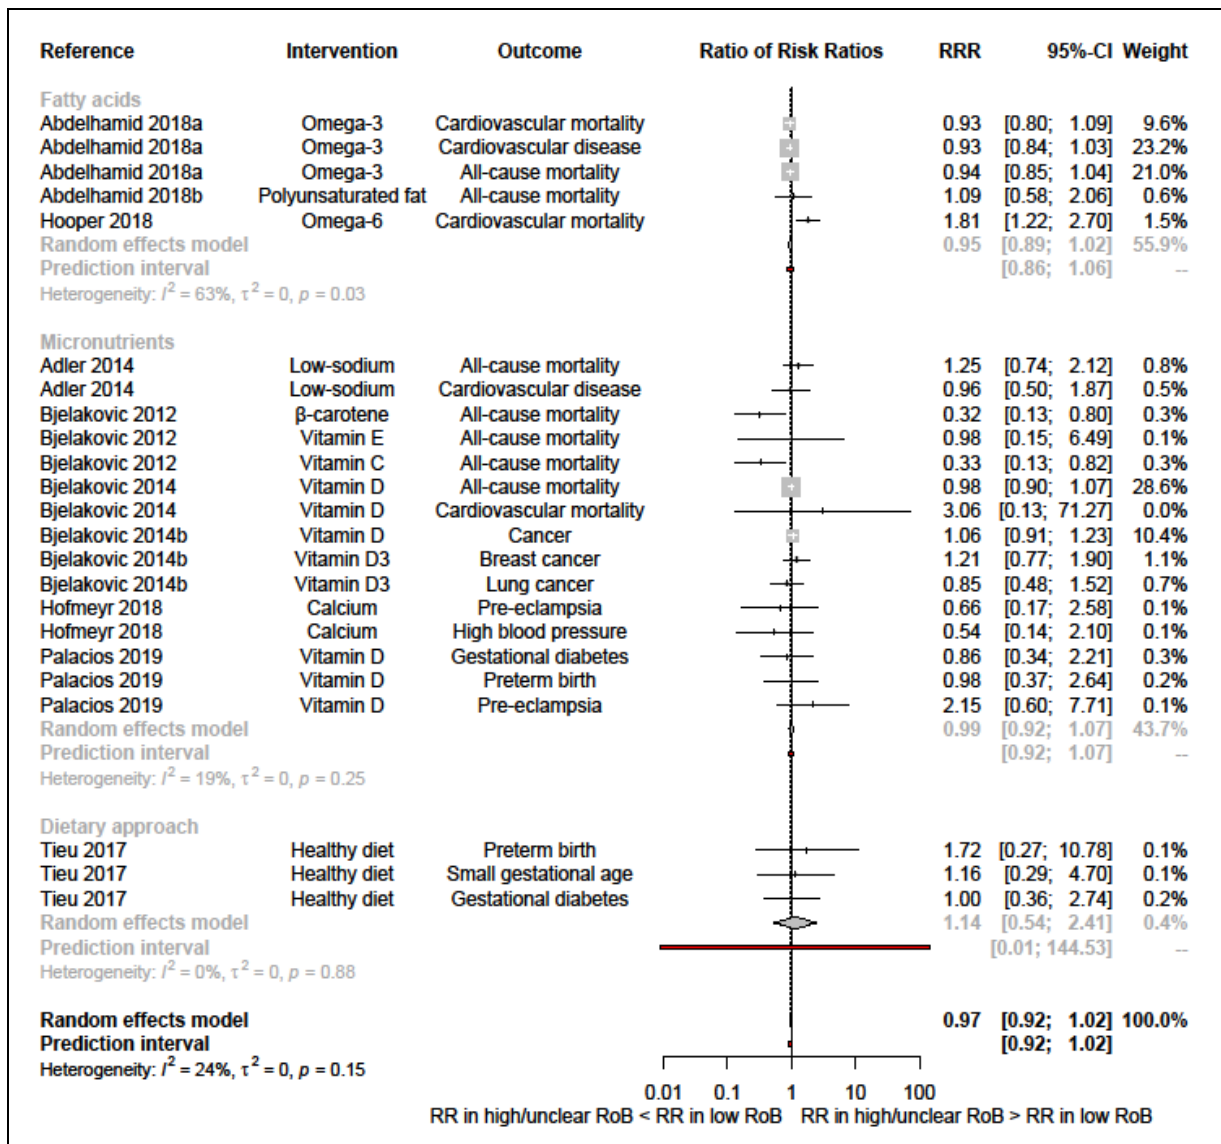

**Figure S50:** Selective Reporting: Comparisons of randomised controlled trials with high/unclear risk of bias versus those with low risk of bias (reference category) for binary outcomes as pooled ratio of risk ratios. Subgroup analysis: Clusters of interventions  
 CI: confidence interval;  $I^2$ : heterogeneity measure; RoB: risk of bias; RR: risk ratio; RRR: ratio of risk ratios;  $\tau^2$ : heterogeneity value with Restricted Maximum-likelihood estimation method

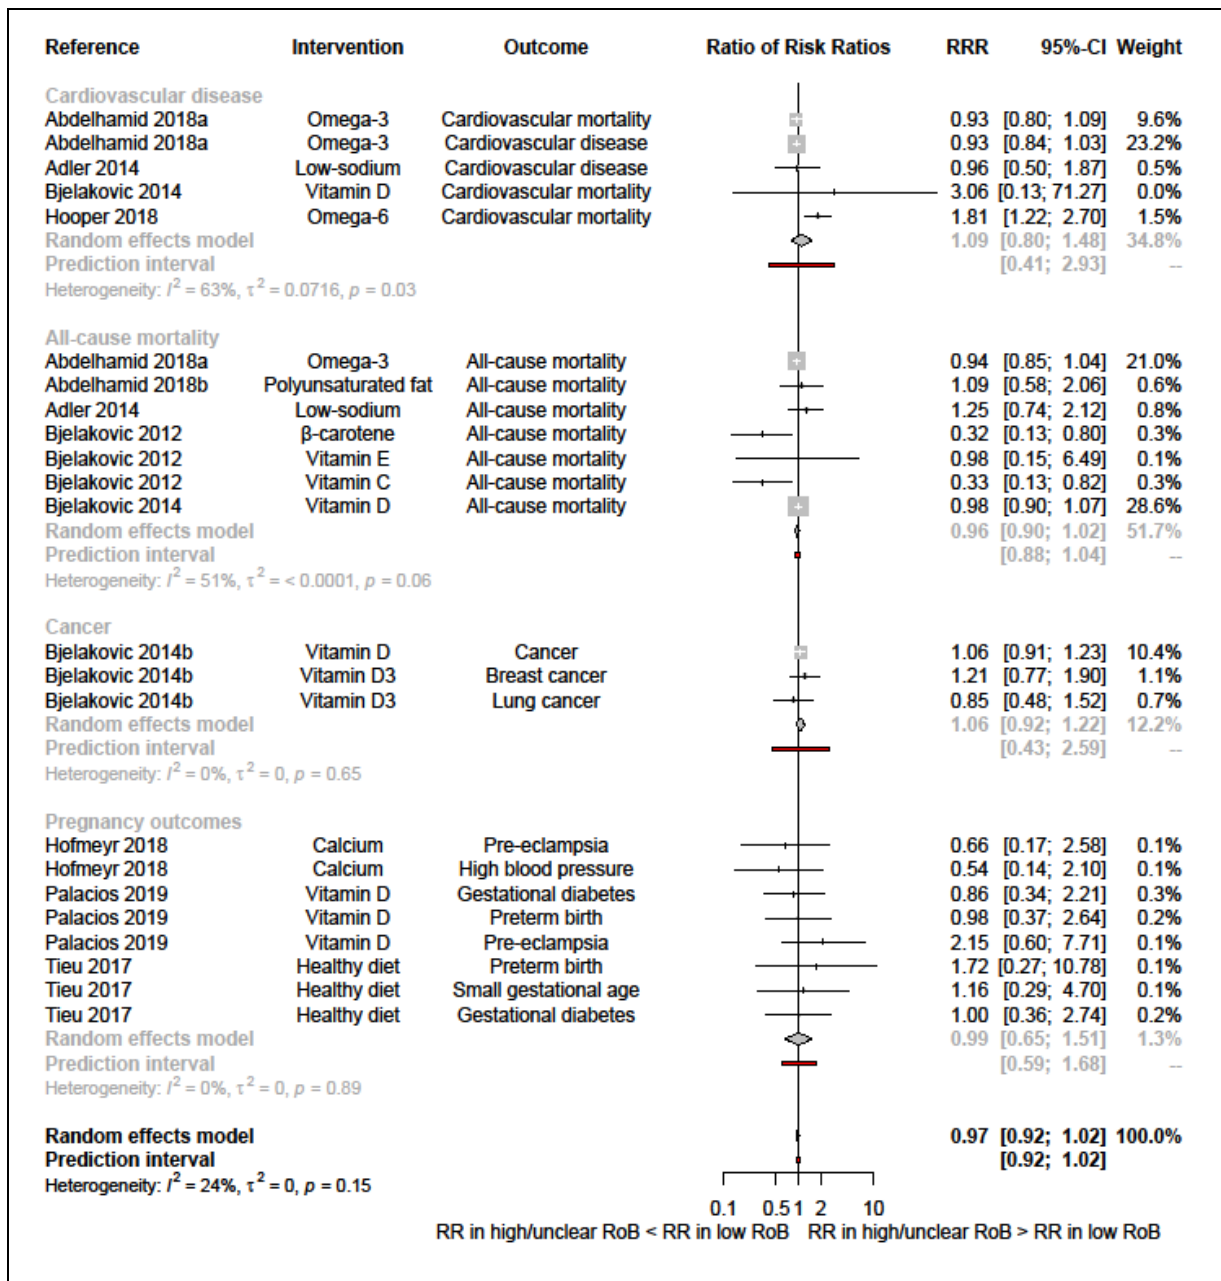

**Figure S51:** Selective Reporting: Comparisons of randomised controlled trials with high/unclear risk of bias versus those with low risk of bias (reference category) for binary outcomes as pooled ratio of risk ratios. Subgroup analysis: Clusters of outcomes  
 CI: confidence interval;  $I^2$ : heterogeneity measure; RoB: risk of bias; RR: risk ratio; RRR: ratio of risk ratios;  $\tau^2$ : heterogeneity value with Restricted Maximum-likelihood estimation method

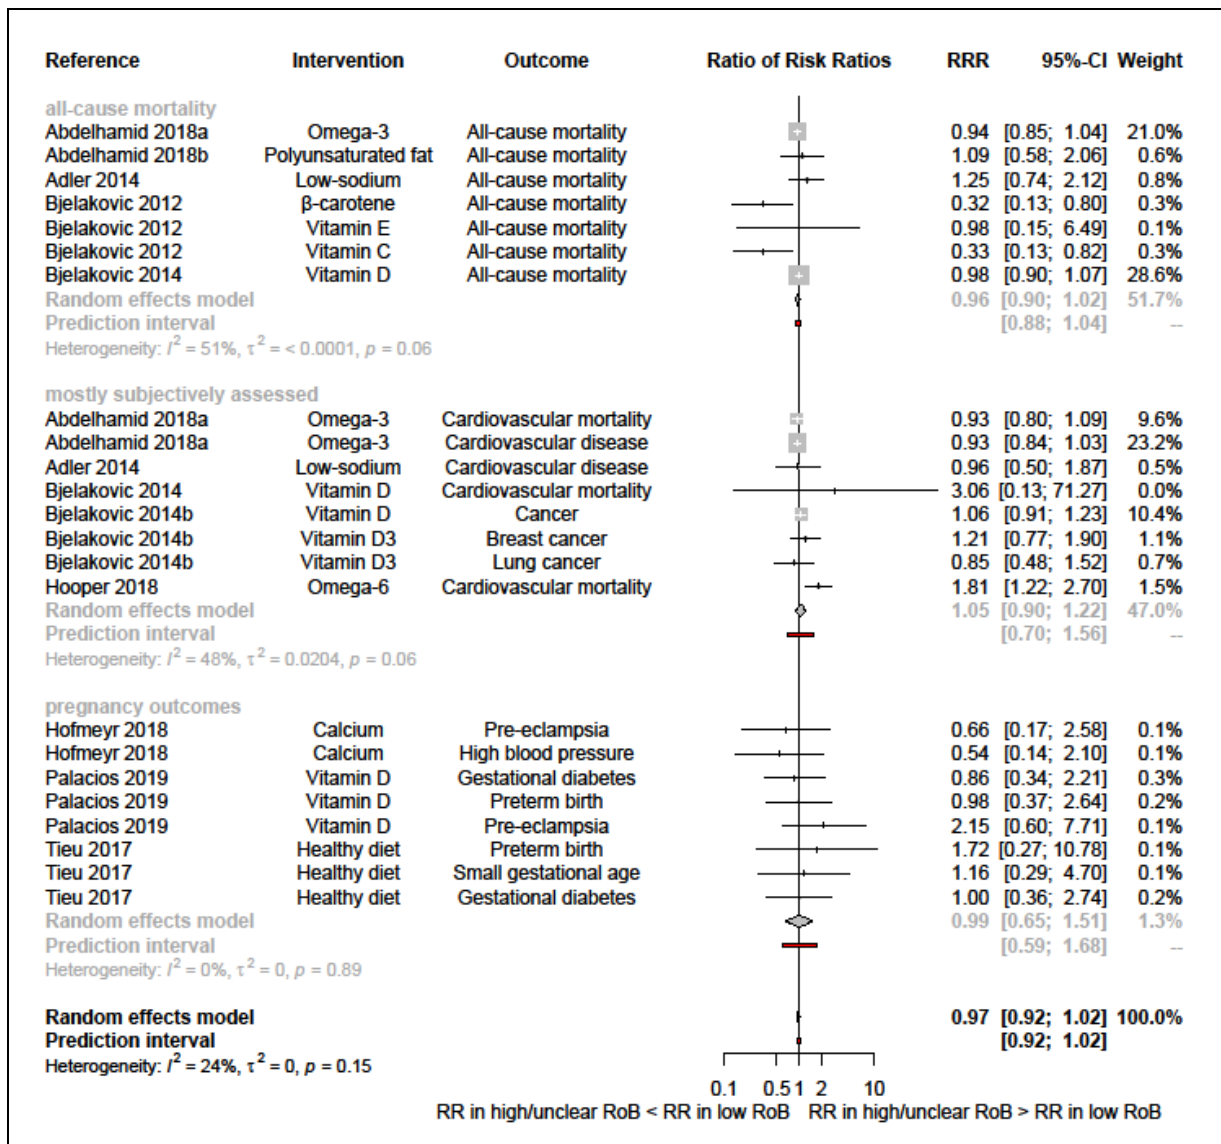

**Figure S52:** Selective Reporting: Comparisons of randomised controlled trials with high/unclear risk of bias versus those with low risk of bias (reference category) for binary outcomes as pooled ratio of risk ratios. Subgroup analysis: Subjective versus objective outcomes  
 CI: confidence interval;  $I^2$ : heterogeneity measure; RoB: risk of bias; RR: risk ratio; RRR: ratio of risk ratios;  $\tau^2$ : heterogeneity value with Restricted Maximum-likelihood estimation method

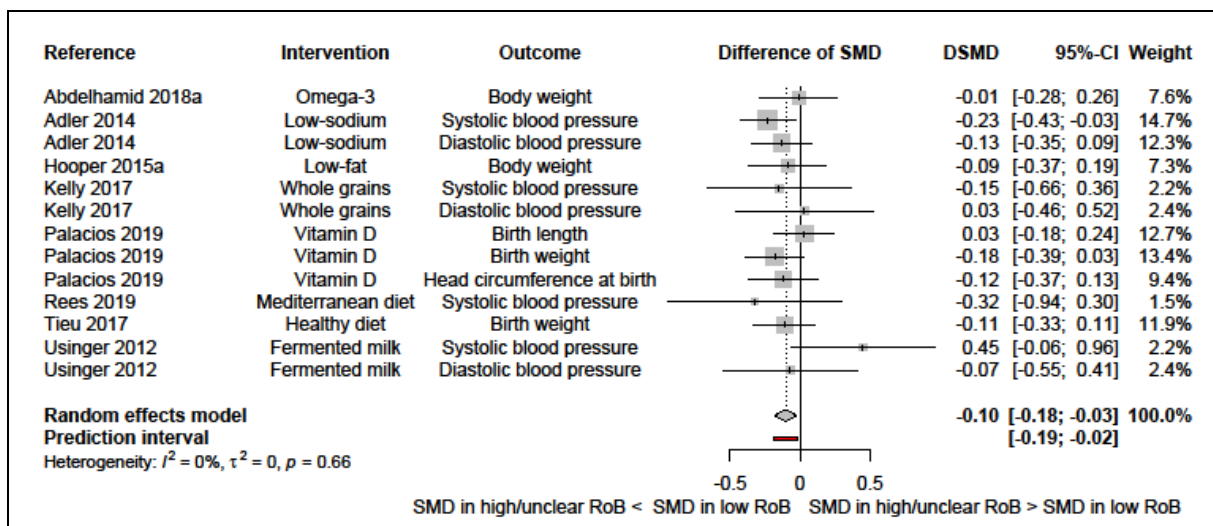

**Figure S53:** Selective Reporting: Comparisons of randomised controlled trials with high/unclear risk of bias versus those with low risk of bias (reference category) for continuous outcomes as pooled difference of standardised mean differences

CI: confidence interval; DSMD: difference of standardised mean differences;  $I^2$ : heterogeneity measure; RoB: risk of bias; SMD: standardised mean difference;  $\tau^2$ : heterogeneity value with Restricted Maximum-likelihood estimation method

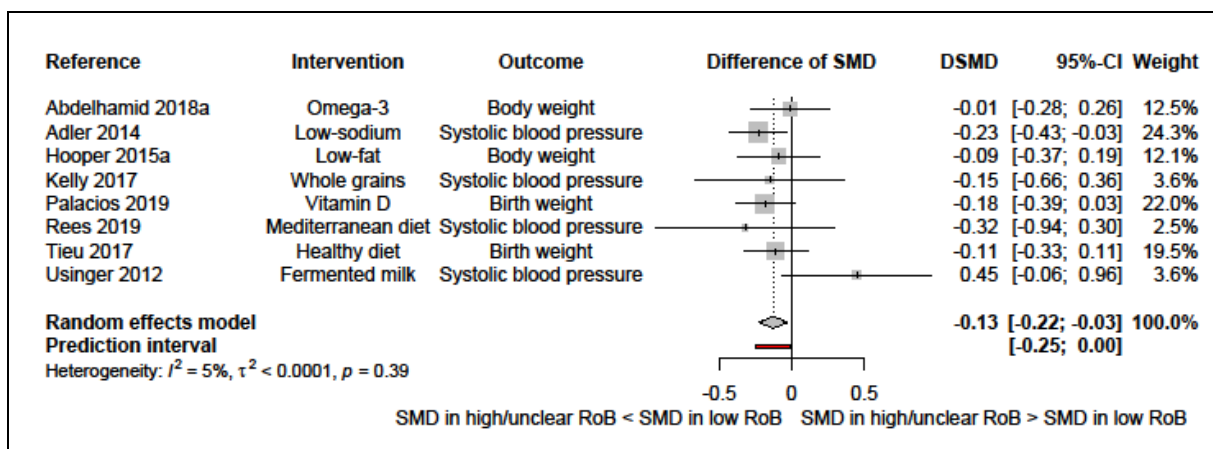

**Figure S54:** Selective Reporting: Comparisons of randomised controlled trials with high/unclear risk of bias versus those with low risk of bias (reference category) for continuous outcomes as pooled difference of standardised mean differences. Sensitivity analysis: Including only one outcome per comparison from each included systematic review

CI: confidence interval; DSMD: difference of standardised mean differences;  $I^2$ : heterogeneity measure; RoB: risk of bias; SMD: standardised mean difference;  $\tau^2$ : heterogeneity value with Restricted Maximum-likelihood estimation method

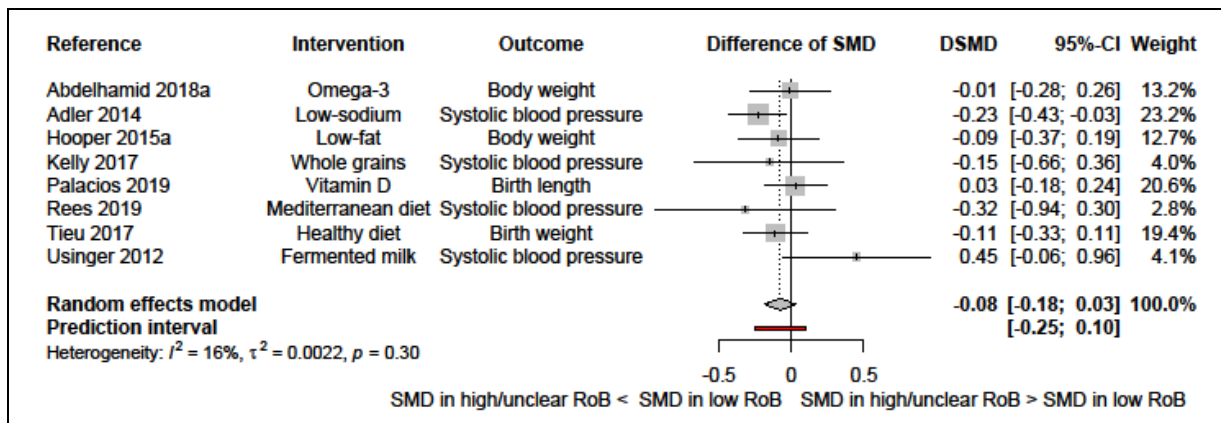

**Figure S55:** Selective Reporting: Comparisons of randomised controlled trials with high/unclear risk of bias versus those with low risk of bias (reference category) for continuous outcomes as pooled difference of standardised mean differences. Sensitivity analysis: Excluding highly correlated outcomes

CI: confidence interval; DSMD: difference of standardised mean differences;  $I^2$ : heterogeneity measure; RoB: risk of bias; SMD: standardised mean difference;  $\tau^2$ : heterogeneity value with Restricted Maximum-likelihood estimation method



## Methodological trial characteristic: Dietary compliance

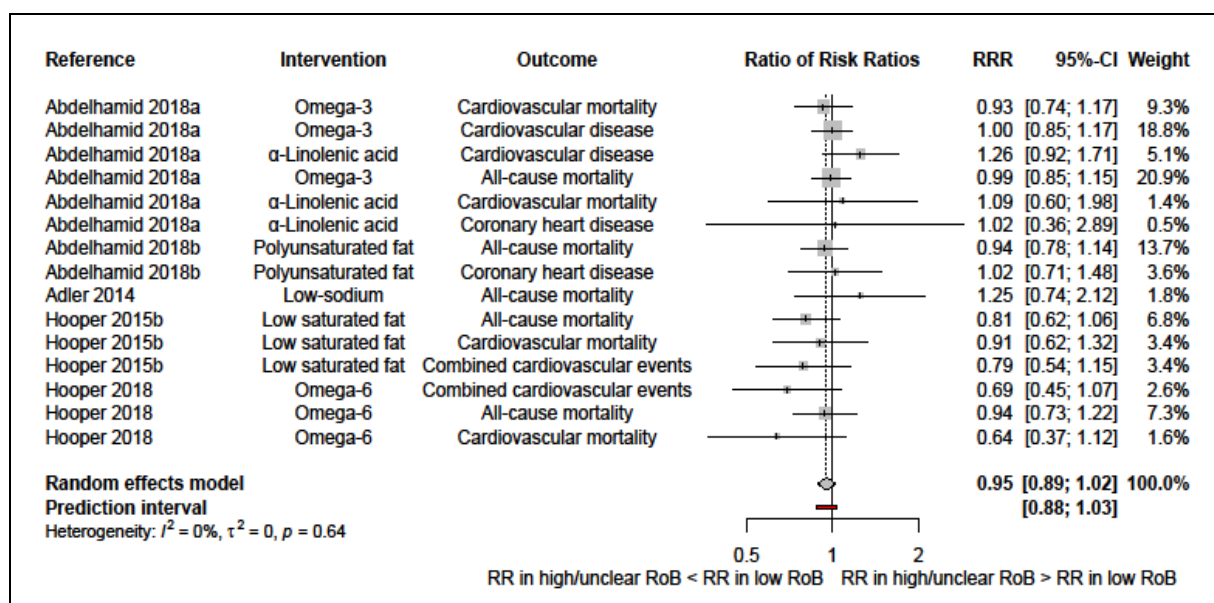

**Figure S56:** Dietary Compliance: Comparisons of randomised controlled trials with high/unclear risk of bias versus those with low risk of bias (reference category) for binary outcomes as pooled ratio of risk ratios

CI: confidence interval;  $I^2$ : heterogeneity measure; RoB: risk of bias; RR: risk ratio; RRR: ratio of risk ratios;  $\tau^2$ : heterogeneity value with Restricted Maximum-likelihood estimation method

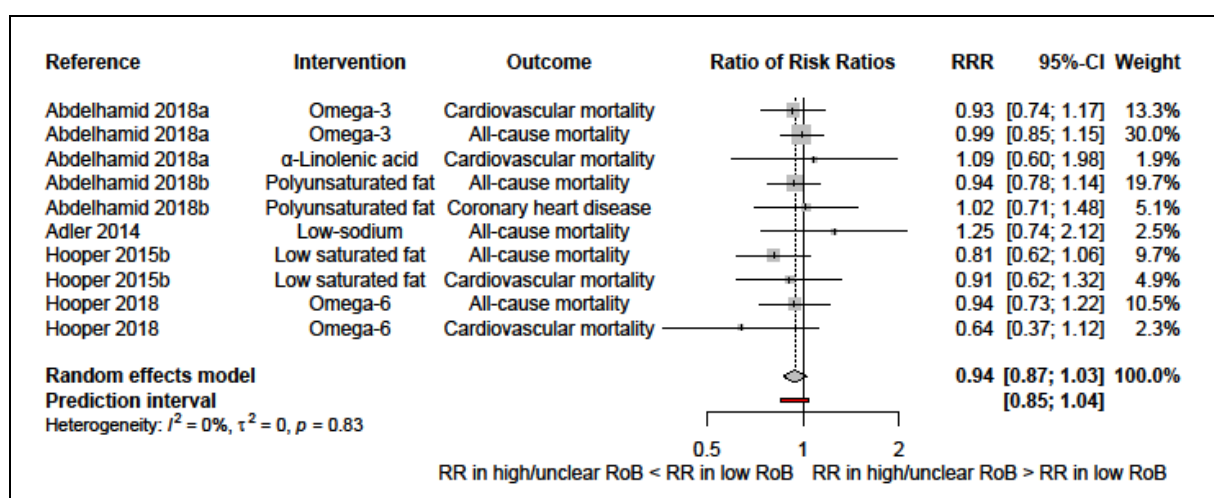

**Figure S57:** Dietary Compliance: Comparisons of randomised controlled trials with high/unclear risk of bias versus those with low risk of bias (reference category) for binary outcomes as pooled ratio of risk ratios. Sensitivity analysis: Excluding highly correlated outcomes

CI: confidence interval;  $I^2$ : heterogeneity measure; RoB: risk of bias; RR: risk ratio; RRR: ratio of risk ratios;  $\tau^2$ : heterogeneity value with Restricted Maximum-likelihood estimation method

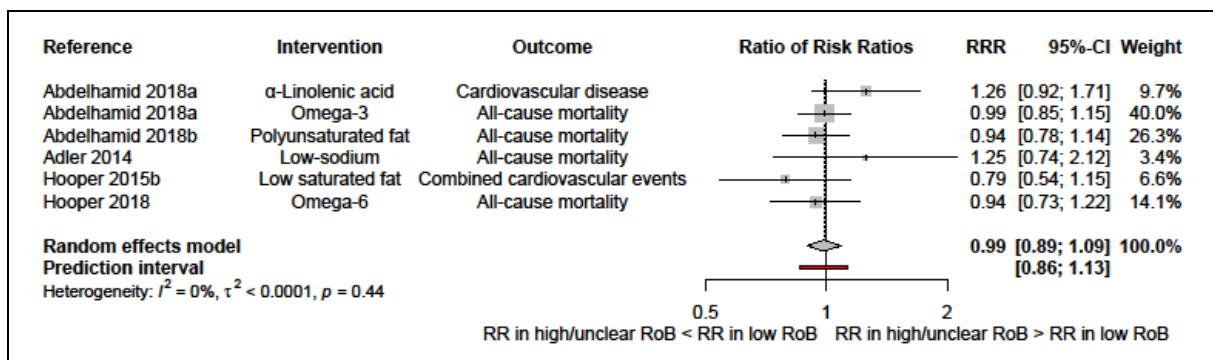

**Figure S58:** Dietary Compliance: Comparisons of randomised controlled trials with high/unclear risk of bias versus those with low risk of bias (reference category) for binary outcomes as pooled ratio of risk ratios. Sensitivity analysis: Including only one outcome per comparison from each included systematic review

CI: confidence interval;  $I^2$ : heterogeneity measure; RoB: risk of bias; RR: risk ratio; RRR: ratio of risk ratios;  $\tau^2$ : heterogeneity value with Restricted Maximum-likelihood estimation method

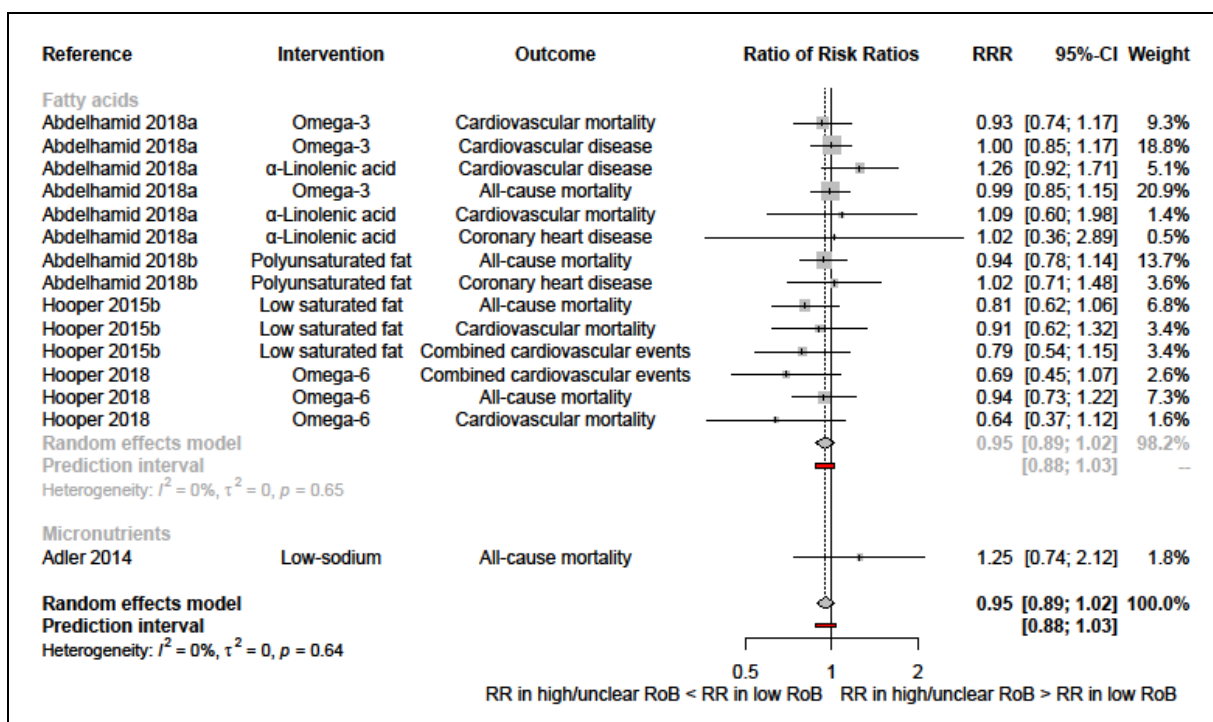

**Figure S59:** Dietary Compliance: Comparisons of randomised controlled trials with high/unclear risk of bias versus those with low risk of bias (reference category) for binary outcomes as pooled ratio of risk ratios. Subgroup analysis: Cluster of interventions

CI: confidence interval;  $I^2$ : heterogeneity measure; RoB: risk of bias; RR: risk ratio; RRR: ratio of risk ratios;  $\tau^2$ : heterogeneity value with Restricted Maximum-likelihood estimation method

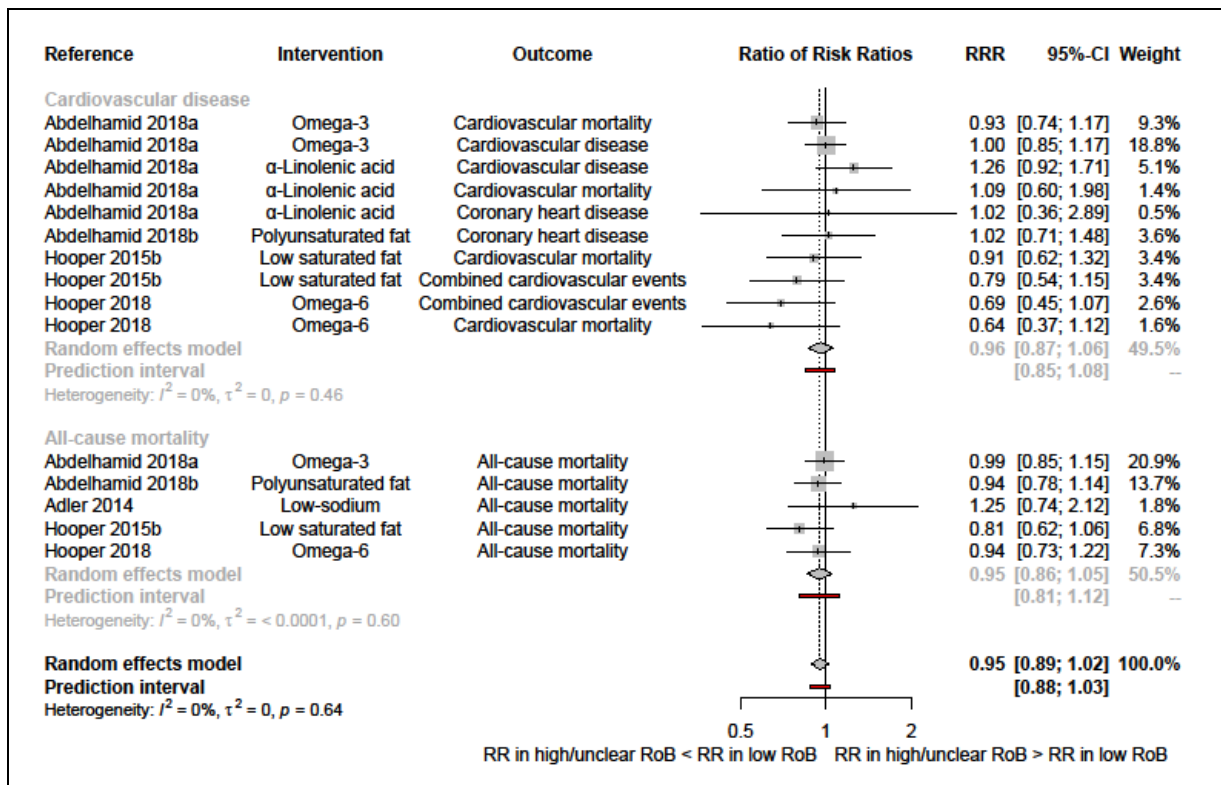

**Figure S60:** Dietary Compliance: Comparisons of randomised controlled trials with high/unclear risk of bias versus those with low risk of bias (reference category) for binary outcomes as pooled ratio of risk ratios. Subgroup analysis: Clusters of outcomes  
 CI: confidence interval;  $I^2$ : heterogeneity measure; RoB: risk of bias; RR: risk ratio; RRR: ratio of risk ratios;  $\tau^2$ : heterogeneity value with Restricted Maximum-likelihood estimation method

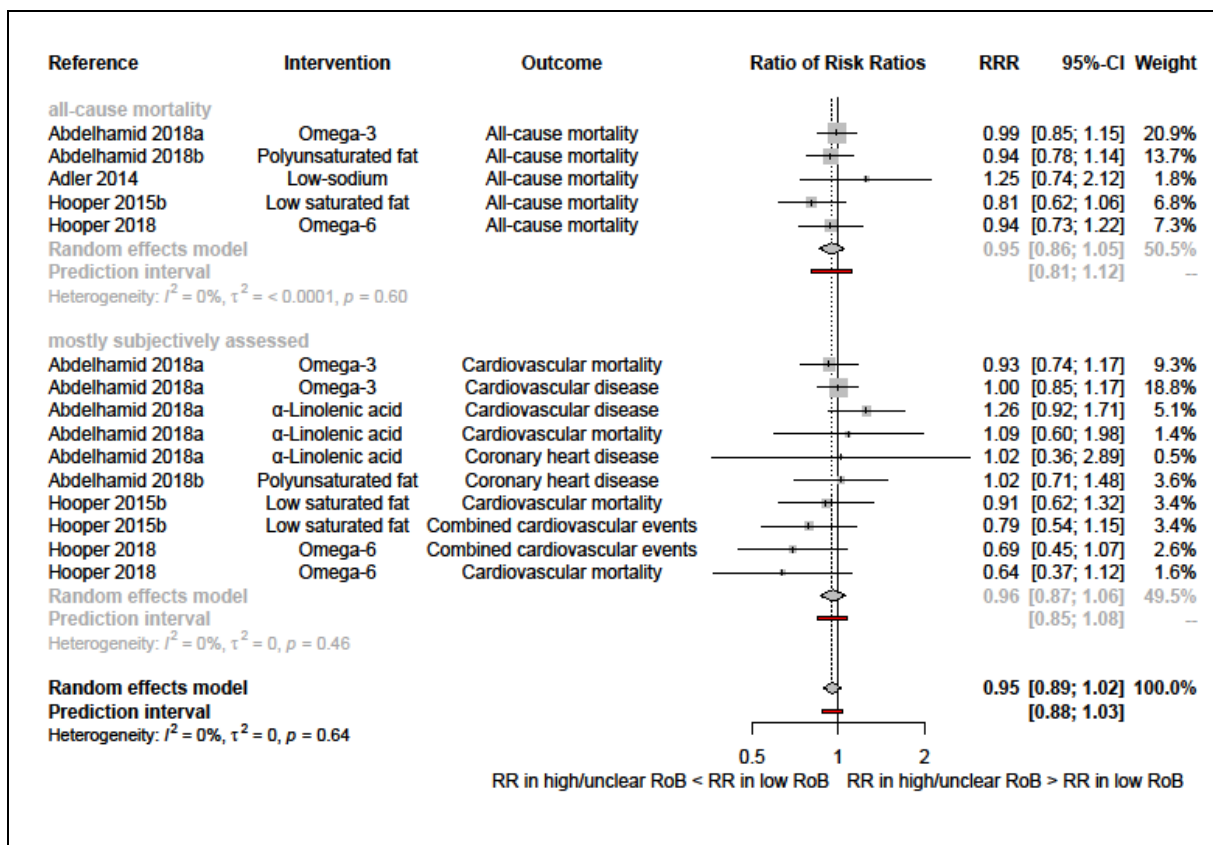

**Figure S61:** Dietary Compliance: Comparisons of randomised controlled trials with high/unclear risk of bias versus those with low risk of bias (reference category) for binary outcomes as pooled ratio of risk ratios. Subgroup analysis: Subjective versus objective outcomes  
 CI: confidence interval;  $I^2$ : heterogeneity measure; RoB: risk of bias; RR: risk ratio; RRR: ratio of risk ratios;  $\tau^2$ : heterogeneity value with Restricted Maximum-likelihood estimation method
