# Supplementary material for: Empirical evidence of study design biases in nutrition randomised controlled trials: a meta-epidemiological study
Source: Springer Nature journal article supplement (doi:10.1186/s12916-022-02540-9), 2022-10-11
Supplement: MOESM3 [file 23591500]

## **ADDITIONAL FILE 3**

### **Empirical evidence of study design biases in nutrition randomised controlled trials: a meta-epidemiological study**

Julia Stadelmaier<sup>1</sup>, Isabelle Roux<sup>1</sup>, Maria Petropoulou<sup>2</sup>, Lukas Schwingshackl<sup>1</sup>

<sup>1</sup> Institute for Evidence in Medicine, Medical Centre - University of Freiburg, Faculty of Medicine, University of Freiburg, Freiburg, Germany.

<sup>2</sup> Institute of Medical Biometry and Statistics, Faculty of Medicine and Medical Centre - University of Freiburg, Freiburg, Germany.

Corresponding author: Julia Stadelmaier, MSc  
Breisacher Straße 86, 79110 Freiburg, Germany  
M: stadelmaier@ifem.uni-freiburg.de  
T: +49 (0)761 203-67957  
ORCID number: 0000-0002-8229-6305

## Content

|                                                                                                                                                                                                                       |    |
|-----------------------------------------------------------------------------------------------------------------------------------------------------------------------------------------------------------------------|----|
| <b>Table S1:</b> Exclusion reasons for highly correlated outcomes from the meta-analysis – Random Sequence.....                                                                                                       | 4  |
| <b>Table S2:</b> Exclusion reasons for highly correlated outcomes from the meta-analysis – Allocation concealment.....                                                                                                | 5  |
| <b>Table S3:</b> Exclusion reasons for highly correlated outcomes from the meta-analysis – Blinding of participants and personnel.....                                                                                | 6  |
| <b>Table S4:</b> Exclusion reasons for highly correlated outcomes from the meta-analysis – Blinding of outcome assessment.....                                                                                        | 7  |
| <b>Table S5:</b> Exclusion reasons for highly correlated outcomes from the meta-analysis – Incomplete outcome data.....                                                                                               | 8  |
| <b>Table S6:</b> Exclusion reasons for highly correlated outcomes from the meta-analysis – Selective Reporting.....                                                                                                   | 9  |
| <b>Table S7:</b> Exclusion reasons for highly correlated outcomes from the meta-analysis – Dietary Compliance.....                                                                                                    | 9  |
| <b>Table S8:</b> References excluded in the full-text screening process.....                                                                                                                                          | 10 |
| <b>Table S9:</b> Meta-analyses excluded from meta-epidemiologic study.....                                                                                                                                            | 10 |
| <b>Table S10:</b> Characteristics of the included meta-analyses with binary outcomes.....                                                                                                                             | 11 |
| <b>Table S11:</b> Characteristics of the included meta-analyses with continuous outcomes.....                                                                                                                         | 14 |
| <b>Table S12:</b> Meta-analyses with comparisons included in meta-epidemiologic study.....                                                                                                                            | 16 |
| <b>Table S13:</b> Multivariable meta-regression for sample size and conflicts of interest across pairs with binary outcome within the methodological trial characteristic random sequence.....                        | 19 |
| <b>Table S14:</b> Multivariable meta-regression for sample size and conflicts of interest across pairs with binary outcome within the methodological trial characteristic allocation concealment.....                 | 19 |
| <b>Table S15:</b> Multivariable meta-regression for sample size and conflicts of interest across pairs with binary outcome within the methodological trial characteristic blinding of participants and personnel..... | 19 |
| <b>Table S16:</b> Multivariable meta-regression for sample size and conflicts of interest across pairs with binary outcome within the methodological trial characteristic blinding of outcome assessment.....         | 19 |
| <b>Table S17:</b> Multivariable meta-regression for sample size and conflicts of interest across pairs with binary outcome within the methodological trial characteristic Incomplete outcome data.....                | 19 |
| <b>Table S18:</b> Multivariable meta-regression for sample size and conflicts of interest across pairs with binary outcome within the methodological trial characteristic Selective reporting.....                    | 19 |
| <b>Table S19:</b> Multivariable meta-regression for sample size and conflicts of interest across pairs with binary outcome within the methodological trial characteristic Dietary compliance.....                     | 19 |
| <b>Table S20:</b> Multivariable meta-regression for sample size and conflicts of interest across pairs with continuous outcome within the methodological trial characteristic: random sequence.....                   | 20 |
| <b>Table S21:</b> Multivariable meta-regression for sample size and conflicts of interest across pairs with continuous outcome within the methodological trial characteristic: allocation concealment.....            | 20 |
| <b>Table S22:</b> Multivariable meta-regression for sample size and conflicts of interest across pairs within the methodological trial characteristic: blinding of participants and personnel.....                    | 20 |
| <b>Table S23:</b> Multivariable meta-regression for sample size and conflicts of interest across pairs within the methodological trial characteristic: blinding of outcome assessment.....                            | 20 |

|                                                                                                                                                                                      |    |
|--------------------------------------------------------------------------------------------------------------------------------------------------------------------------------------|----|
| <b>Table S24:</b> Multivariable meta-regression for sample size and conflicts of interest across pairs within the methodological trial characteristic: Incomplete outcome data ..... | 20 |
| <b>Table S25:</b> Multivariable meta-regression for sample size and conflicts of interest across pairs within the methodological trial characteristic: Selective reporting .....     | 20 |
| <b>Table S26:</b> Definition of dietary compliance in the included Cochrane reviews .....                                                                                            | 21 |

**Table S1:** Exclusion reasons for highly correlated outcomes from the meta-analysis – Random Sequence

| Author, Year (Reference) | Intervention             | Outcome                        | Reason for exclusion                                             |
|--------------------------|--------------------------|--------------------------------|------------------------------------------------------------------|
| Abdelhamid 2018a (1)     | Omega-3                  | Cardiovascular disease         | Highly likely correlated with outcome “cardiovascular mortality” |
| Abdelhamid 2018a (1)     | $\alpha$ -Linolenic acid | Cardiovascular disease         | Highly likely correlated with outcome “cardiovascular mortality” |
| Abdelhamid 2018a (1)     | $\alpha$ -Linolenic acid | Coronary heart disease         | Highly likely correlated with outcome “cardiovascular mortality” |
| Adler 2014 (2)           | Low-sodium               | Cardiovascular disease         | Highly likely correlated with outcome “cardiovascular mortality” |
| Adler 2014 (2)           | Low-sodium               | Diastolic blood pressure       | Highly likely correlated with outcome “systolic blood pressure”  |
| Avenell 2014 (3)         | Vitamin D                | Any fracture                   | Highly likely correlated with outcome “hip fracture”             |
| Cormick 2015 (4)         | Calcium                  | Diastolic blood pressure       | Highly likely correlated with outcome “systolic blood pressure”  |
| Hartley 2013 (5)         | Fruit & Vegetables       | Diastolic blood pressure       | Highly likely correlated with outcome “systolic blood pressure”  |
| Hartley 2016 (6)         | Fibre                    | Diastolic blood pressure       | Highly likely correlated with outcome “systolic blood pressure”  |
| Hofmeyr 2018 (7)         | Calcium                  | High blood pressure            | Highly likely correlated with outcome “pre-eclampsia”            |
| Hooper 2012 (8)          | Low-fat/modified fat     | Combined cardiovascular events | Highly likely correlated with outcome “cardiovascular mortality” |
| Hooper 2018 (9)          | Omega-6                  | Combined cardiovascular events | Highly likely correlated with outcome “cardiovascular mortality” |
| Keats 2019 (10)          | Micronutrients           | Low birth weight               | Highly likely correlated with outcome “preterm birth”            |
| Keats 2019 (10)          | Micronutrients           | Small gestational age          | Highly likely correlated with outcome “preterm birth”            |
| Kelly 2017 (11)          | Whole grains             | Diastolic blood pressure       | Highly likely correlated with outcome “systolic blood pressure”  |
| Rees 2013a (12)          | Healthy diet             | Diastolic blood pressure       | Highly likely correlated with outcome “systolic blood pressure”  |
| Rees 2013b (13)          | Selenium                 | Combined cardiovascular events | Highly likely correlated with outcome “cardiovascular mortality” |
| Rees 2019 (14)           | Mediterranean diet       | Triglycerides                  | Highly likely correlated with outcome “high density lipoprotein” |
| Rees 2019 (14)           | Mediterranean diet       | Systolic blood pressure        | Highly likely correlated with outcome “high density lipoprotein” |
| Usinger 2012 (15)        | Fermented milk           | Diastolic blood pressure       | Highly likely correlated with outcome “systolic blood pressure”  |
| Yao 2017 (16)            | Fibre                    | Colorectal adenoma             | Highly likely correlated with outcome “colorectal cancer”        |

**Table S2:** Exclusion reasons for highly correlated outcomes from the meta-analysis – Allocation concealment

| Author, Year (Reference) | Intervention             | Outcome                        | Reason for exclusion                                             |
|--------------------------|--------------------------|--------------------------------|------------------------------------------------------------------|
| Abdelhamid 2018a (1)     | Omega-3                  | Cardiovascular disease         | Highly likely correlated with outcome “cardiovascular mortality” |
| Abdelhamid 2018a (1)     | $\alpha$ -Linolenic acid | Cardiovascular disease         | Highly likely correlated with outcome “cardiovascular mortality” |
| Abdelhamid 2018a (1)     | $\alpha$ -Linolenic acid | Coronary heart disease         | Highly likely correlated with outcome “cardiovascular mortality” |
| Adler 2014 (2)           | Low-sodium               | Cardiovascular disease         | Highly likely correlated with outcome “cardiovascular mortality” |
| Adler 2014 (2)           | Low-sodium               | Diastolic blood pressure       | Highly likely correlated with outcome “systolic blood pressure”  |
| Avenell 2014 (3)         | Vitamin D                | Any fracture                   | Highly likely correlated with outcome “hip fracture”             |
| Cormick 2015 (4)         | Calcium                  | Diastolic blood pressure       | Highly likely correlated with outcome “systolic blood pressure”  |
| Hartley 2016 (6)         | Fibre                    | Diastolic blood pressure       | Highly likely correlated with outcome “systolic blood pressure”  |
| Hofmeyr 2018 (7)         | Calcium                  | High blood pressure            | Highly likely correlated with outcome “pre-eclampsia”            |
| Hooper 2012 (8)          | Low-fat/modified fat     | Combined cardiovascular events | Highly likely correlated with outcome “cardiovascular mortality” |
| Hooper 2015b             | Low saturated fat        | Combined cardiovascular events | Highly likely correlated with outcome “cardiovascular mortality” |
| Hooper 2018 (9)          | Omega-6                  | Combined cardiovascular events | Highly likely correlated with outcome “cardiovascular mortality” |
| Keats 2019 (10)          | Micronutrients           | Low birth weight               | Highly likely correlated with outcome “preterm birth”            |
| Keats 2019 (10)          | Micronutrients           | Small gestational age          | Highly likely correlated with outcome “preterm birth”            |
| Kelly 2017 (11)          | Whole grains             | Diastolic blood pressure       | Highly likely correlated with outcome “systolic blood pressure”  |
| Palacios 2019 (17)       | Vitamin D                | Birth weight                   | Highly likely correlated with outcome “birth length”             |
| Palacios 2019 (17)       | Vitamin D                | Head circumference at birth    | Highly likely correlated with outcome “birth length”             |
| Rees 2013a (12)          | Healthy diet             | Diastolic blood pressure       | Highly likely correlated with outcome “systolic blood pressure”  |
| Rees 2013b (13)          | Selenium                 | Combined cardiovascular events | Highly likely correlated with outcome “cardiovascular mortality” |
| Rees 2019 (14)           | Mediterranean diet       | Triglycerides                  | Highly likely correlated with outcome “high density lipoprotein” |
| Rees 2019 (14)           | Mediterranean diet       | Systolic blood pressure        | Highly likely correlated with outcome “high density lipoprotein” |
| Usinger 2012 (15)        | Fermented milk           | Diastolic blood pressure       | Highly likely correlated with outcome “systolic blood pressure”  |
| Yao 2017 (16)            | Fibre                    | Colorectal adenoma             | Highly likely correlated with outcome “colorectal cancer”        |

**Table S3:** Exclusion reasons for highly correlated outcomes from the meta-analysis – Blinding of participants and personnel

| Author, Year (Reference) | Intervention             | Outcome                        | Reason for exclusion                                             |
|--------------------------|--------------------------|--------------------------------|------------------------------------------------------------------|
| Abdelhamid 2018a (1)     | Omega-3                  | Cardiovascular disease         | Highly likely correlated with outcome “cardiovascular mortality” |
| Abdelhamid 2018a (1)     | $\alpha$ -Linolenic acid | Coronary heart disease         | Highly likely correlated with outcome “cardiovascular disease”   |
| Abdelhamid 2018b (18)    | Polyunsaturated fat      | Major cardiovascular events    | Highly likely correlated with outcome “coronary heart disease”   |
| Adler 2014 (2)           | Low-sodium               | Cardiovascular disease         | Highly likely correlated with outcome “cardiovascular mortality” |
| Adler 2014 (2)           | Low-sodium               | Diastolic blood pressure       | Highly likely correlated with outcome “systolic blood pressure”  |
| Bjelakovic 2014b (19)    | Vitamin D3               | Breast Cancer                  | Highly likely correlated with outcome “cancer”                   |
| Bjelakovic 2014b (19)    | Vitamin D3               | Lung Cancer                    | Highly likely correlated with outcome “cancer”                   |
| Cormick 2015 (4)         | Calcium                  | Diastolic blood pressure       | Highly likely correlated with outcome “systolic blood pressure”  |
| Hartley 2016 (6)         | Fibre                    | Diastolic blood pressure       | Highly likely correlated with outcome “systolic blood pressure”  |
| Hofmeyr 2018 (7)         | Calcium                  | High blood pressure            | Highly likely correlated with outcome “pre-eclampsia”            |
| Hooper 2018 (9)          | Omega-6                  | Combined cardiovascular event  | Highly likely correlated with outcome “cardiovascular mortality” |
| Keats 2019 (10)          | Micronutrients           | Low birth weight               | Highly likely correlated with outcome “preterm birth”            |
| Keats 2019 (10)          | Micronutrients           | Small gestational age          | Highly likely correlated with outcome “preterm birth”            |
| Palacios 2019 (17)       | Vitamin D                | Birth weight                   | Highly likely correlated with outcome “birth length”             |
| Palacios 2019 (17)       | Vitamin D                | Head circumference at birth    | Highly likely correlated with outcome “birth length”             |
| Rees 2013b (13)          | Selenium                 | Combined cardiovascular events | Highly likely correlated with outcome “cardiovascular mortality” |

**Table S4:** Exclusion reasons for highly correlated outcomes from the meta-analysis – Blinding of outcome assessment

| Author, Year (Reference) | Intervention             | Outcome                        | Reason for exclusion                                             |
|--------------------------|--------------------------|--------------------------------|------------------------------------------------------------------|
| Abdelhamid 2018a (1)     | Omega-3                  | Cardiovascular disease         | Highly likely correlated with outcome “cardiovascular mortality” |
| Abdelhamid 2018a (1)     | $\alpha$ -Linolenic acid | Coronary heart disease         | Highly likely correlated with outcome “cardiovascular disease”   |
| Adler 2014 (2)           | Low-sodium               | Diastolic blood pressure       | Highly likely correlated with outcome “systolic blood pressure”  |
| Bjelakovic 2014b (19)    | Vitamin D3               | Breast Cancer                  | Highly likely correlated with outcome “cancer”                   |
| Bjelakovic 2014b (19)    | Vitamin D3               | Lung Cancer                    | Highly likely correlated with outcome “cancer”                   |
| Cormick 2015 (4)         | Calcium                  | Diastolic blood pressure       | Highly likely correlated with outcome “systolic blood pressure”  |
| Hartley 2013 (6)         | Fruit & Vegetables       | Diastolic blood pressure       | Highly likely correlated with outcome “systolic blood pressure”  |
| Hartley 2016 (6)         | Fibre                    | Diastolic blood pressure       | Highly likely correlated with outcome “systolic blood pressure”  |
| Hofmeyr 2018 (7)         | Calcium                  | High blood pressure            | Highly likely correlated with outcome “pre-eclampsia”            |
| Hooper 2018 (9)          | Omega-6                  | Combined cardiovascular events | Highly likely correlated with outcome “cardiovascular mortality” |
| Keats 2019 (10)          | Micronutrients           | Low birth weight               | Highly likely correlated with outcome “preterm birth”            |
| Keats 2019 (10)          | Micronutrients           | Small gestational age          | Highly likely correlated with outcome “preterm birth”            |
| Kelly 2017 (11)          | Whole grains             | Diastolic blood pressure       | Highly likely correlated with outcome “systolic blood pressure”  |
| Palacios 2019 (17)       | Vitamin D                | Birth weight                   | Highly likely correlated with outcome “birth length”             |
| Palacios 2019 (17)       | Vitamin D                | Head circumference at birth    | Highly likely correlated with outcome “birth length”             |
| Rees 2013a (12)          | Healthy diet             | Diastolic blood pressure       | Highly likely correlated with outcome “systolic blood pressure”  |
| Rees 2013b (13)          | Selenium                 | Combined cardiovascular events | Highly likely correlated with outcome “cardiovascular mortality” |
| Rees 2019 (14)           | Mediterranean diet       | Triglycerides                  | Highly likely correlated with outcome “high density lipoprotein” |
| Rees 2019 (14)           | Mediterranean diet       | Systolic blood pressure        | Highly likely correlated with outcome “high density lipoprotein” |

**Table S5:** Exclusion reasons for highly correlated outcomes from the meta-analysis – Incomplete outcome data

| Author, Year (Reference) | Intervention         | Outcome                        | Reason for exclusion                                             |
|--------------------------|----------------------|--------------------------------|------------------------------------------------------------------|
| Abdelhamid 2018a (1)     | Omega-3              | Cardiovascular disease         | Highly likely correlated with outcome “cardiovascular mortality” |
| Adler 2014 (2)           | Low-sodium           | Cardiovascular disease         | Highly likely correlated with outcome “cardiovascular mortality” |
| Adler 2014 (2)           | Low-sodium           | Diastolic blood pressure       | Highly likely correlated with outcome “systolic blood pressure”  |
| Bjelakovic 2014b (19)    | Vitamin D3           | Breast Cancer                  | Highly likely correlated with outcome “cancer”                   |
| Bjelakovic 2014b (19)    | Vitamin D3           | Lung Cancer                    | Highly likely correlated with outcome “cancer”                   |
| Cormick 2015 (4)         | Calcium              | Diastolic blood pressure       | Highly likely correlated with outcome “systolic blood pressure”  |
| Hartley 2016 (6)         | Fibre                | Diastolic blood pressure       | Highly likely correlated with outcome “systolic blood pressure”  |
| Hofmeyr 2018 (7)         | Calcium              | High blood pressure            | Highly likely correlated with outcome “pre-eclampsia”            |
| Hooper 2012 (8)          | Low-fat/modified fat | Combined cardiovascular events | Highly likely correlated with outcome “cardiovascular mortality” |
| Hooper 2015b (20)        | Low saturated fat    | Combined cardiovascular events | Highly likely correlated with outcome “cardiovascular mortality” |
| Hooper 2018 (9)          | Omega-6              | Combined cardiovascular event  | Highly likely correlated with outcome “cardiovascular mortality” |
| Keats 2019 (10)          | Micronutrients       | Low birth weight               | Highly likely correlated with outcome “preterm birth”            |
| Keats 2019 (10)          | Micronutrients       | Small gestational age          | Highly likely correlated with outcome “preterm birth”            |
| Kelly 2017 (11)          | Whole grains         | Diastolic blood pressure       | Highly likely correlated with outcome “systolic blood pressure”  |
| Palacios 2019 (17)       | Vitamin D            | Birth weight                   | Highly likely correlated with outcome “birth length”             |
| Palacios 2019 (17)       | Vitamin D            | Head circumference at birth    | Highly likely correlated with outcome “birth length”             |
| Rees 2013a (12)          | Healthy diet         | Diastolic blood pressure       | Highly likely correlated with outcome “systolic blood pressure”  |
| Rees 2019 (14)           | Mediterranean diet   | Triglycerides                  | Highly likely correlated with outcome “high density lipoprotein” |
| Rees 2019 (14)           | Mediterranean diet   | Systolic blood pressure        | Highly likely correlated with outcome “high density lipoprotein” |
| Tieu 2017 (21)           | Healthy diet         | Preterm birth                  | Highly likely correlated with outcome “small gestational age”    |
| Usinger 2012 (15)        | Fermented milk       | Diastolic blood pressure       | Highly likely correlated with outcome “systolic blood pressure”  |

**Table S6:** Exclusion reasons for highly correlated outcomes from the meta-analysis – Selective Reporting

| Author, Year (Reference) | Intervention   | Outcome                     | Reason for exclusion                                             |
|--------------------------|----------------|-----------------------------|------------------------------------------------------------------|
| Abdelhamid 2018a (1)     | Omega-3        | Cardiovascular disease      | Highly likely correlated with outcome “cardiovascular mortality” |
| Adler 2014 (2)           | Low-sodium     | Diastolic blood pressure    | Highly likely correlated with outcome “systolic blood pressure”  |
| Bjelakovic 2014b (19)    | Vitamin D3     | Breast Cancer               | Highly likely correlated with outcome “cancer”                   |
| Bjelakovic 2014b (19)    | Vitamin D3     | Lung Cancer                 | Highly likely correlated with outcome “cancer”                   |
| Hofmeyr 2018 (7)         | Calcium        | High blood pressure         | Highly likely correlated with outcome “pre-eclampsia”            |
| Kelly 2017 (11)          | Whole grains   | Diastolic blood pressure    | Highly likely correlated with outcome “systolic blood pressure”  |
| Palacios 2019 (17)       | Vitamin D      | Birth weight                | Highly likely correlated with outcome “birth length”             |
| Palacios 2019 (17)       | Vitamin D      | Head circumference at birth | Highly likely correlated with outcome “birth length”             |
| Tieu 2017 (21)           | Healthy diet   | Preterm birth               | Highly likely correlated with outcome “small gestational age”    |
| Usinger 2012 (15)        | Fermented milk | Diastolic blood pressure    | Highly likely correlated with outcome “systolic blood pressure”  |

**Table S7:** Exclusion reasons for highly correlated outcomes from the meta-analysis – Dietary Compliance

| Author, Year (Reference) | Intervention             | Outcome                        | Reason for exclusion                                             |
|--------------------------|--------------------------|--------------------------------|------------------------------------------------------------------|
| Abdelhamid 2018a (1)     | Omega-3                  | Cardiovascular disease         | Highly likely correlated with outcome “cardiovascular mortality” |
| Abdelhamid 2018a (1)     | $\alpha$ -Linolenic acid | Cardiovascular disease         | Highly likely correlated with outcome “cardiovascular mortality” |
| Abdelhamid 2018a (1)     | $\alpha$ -Linolenic acid | Coronary heart disease         | Highly likely correlated with outcome “cardiovascular mortality” |
| Adler 2014 (2)           | Low-sodium               | Diastolic blood pressure       | Highly likely correlated with outcome “systolic blood pressure”  |
| Hooper 2015b (20)        | Low saturated fat        | Combined cardiovascular events | Highly likely correlated with outcome “cardiovascular mortality” |
| Hooper 2018 (9)          | Omega-6                  | Combined cardiovascular events | Highly likely correlated with outcome “cardiovascular mortality” |

**Table S8:** References excluded in the full-text screening process

| Reference                                     | Reason                                                                                                                   |
|-----------------------------------------------|--------------------------------------------------------------------------------------------------------------------------|
| <b>Excluded from overarching project</b>      |                                                                                                                          |
| (22-35)                                       | Did not fulfil PICO [Population, Intervention, Comparison, Outcome] inclusion criteria.                                  |
| (36-53)                                       | No corresponding systematic review of cohort studies on dietary intake and or biomarker of dietary intake was available. |
| <b>Excluded from meta-epidemiologic study</b> |                                                                                                                          |
| (54-58)                                       | Only one randomised controlled trial is included for an eligible PICO.                                                   |

**Table S9:** Meta-analyses excluded from meta-epidemiologic study

| Author, Year<br>(Reference) | Intervention       | Outcome                         | Comparison possible for methodological trial characteristic? |                        |                       |                                |                         |                     |                    |
|-----------------------------|--------------------|---------------------------------|--------------------------------------------------------------|------------------------|-----------------------|--------------------------------|-------------------------|---------------------|--------------------|
|                             |                    |                                 | random sequence                                              | allocation concealment | blinding participants | blinding of outcome assessment | incomplete outcome data | selective reporting | dietary compliance |
| Bjelakovic 2014a (59)       | Vitamin D          | Cancer mortality                | no                                                           | no                     | n/a                   | n/a                            | no                      | no                  | n/a                |
| Mathew 2012 (60)            | β-Carotene         | Cataract                        | no                                                           | no                     | n/a                   | n/a                            | no                      | no                  | n/a                |
| Mathew 2012 (60)            | Vitamin C          | Cataract*                       | n/a                                                          | n/a                    | n/a                   | n/a                            | n/a                     | n/a                 | n/a                |
| Rees 2019 (14)              | Mediterranean diet | Cardiovascular mortality*       | n/a                                                          | n/a                    | n/a                   | n/a                            | n/a                     | n/a                 | n/a                |
| Rees 2019 (14)              | Mediterranean diet | Combined cardiovascular events* | n/a                                                          | n/a                    | n/a                   | n/a                            | n/a                     | n/a                 | n/a                |
| Rees 2019 (14)              | Mediterranean diet | All-cause mortality*            | n/a                                                          | n/a                    | n/a                   | n/a                            | n/a                     | n/a                 | n/a                |
| Sydenham 2012 (61)          | Omega-3            | Mini-Mental State Examination   | no                                                           | no                     | n/a                   | n/a                            | no                      | no                  | n/a                |
| Vinceti 2018 (62)           | Selenium           | Cancer mortality                | no                                                           | no                     | n/a                   | n/a                            | n/a                     | no                  | n/a                |
| Vinceti 2018 (62)           | Selenium           | Colorectal cancer               | no                                                           | no                     | n/a                   | n/a                            | n/a                     | no                  | n/a                |

\*meta-analysis contains only n=1 randomised controlled trial

n/a: not applicable

**Table S10:** Characteristics of the included meta-analyses with binary outcomes

| Author, Year (Reference) | Intervention category    | Type of intake       | Outcome as defined by the author | Cluster of outcomes    | Cluster of interventions | n (studies) | Sample size | Conflict of interest (Yes/No) |
|--------------------------|--------------------------|----------------------|----------------------------------|------------------------|--------------------------|-------------|-------------|-------------------------------|
| Abdelhamid 2018a (1)     | Omega-3                  | Intake + Supplements | Cardiovascular mortality         | Cardiovascular disease | Fatty acids              | 25          | 67,772      | No                            |
| Abdelhamid 2018a (1)     | Omega-3                  | Intake + Supplements | Cardiovascular disease           | Cardiovascular disease | Fatty acids              | 38          | 90,378      | No                            |
| Abdelhamid 2018a (1)     | $\alpha$ -Linolenic acid | Intake               | Cardiovascular disease           | Cardiovascular disease | Fatty acids              | 5           | 19,327      | No                            |
| Abdelhamid 2018a (1)     | Omega-3                  | Intake + Supplements | All-cause mortality              | All-cause mortality    | Fatty acids              | 39          | 92,653      | No                            |
| Abdelhamid 2018a (1)     | $\alpha$ -Linolenic acid | Intake               | Cardiovascular mortality         | Cardiovascular disease | Fatty acids              | 4           | 18,619      | No                            |
| Abdelhamid 2018a (1)     | $\alpha$ -Linolenic acid | Intake               | Coronary heart disease           | Cardiovascular disease | Fatty acids              | 4           | 19,061      | No                            |
| Abdelhamid 2018b (18)    | Polyunsaturated fat      | Intake + Supplements | All-cause mortality              | All-cause mortality    | Fatty acids              | 24          | 19,290      | No                            |
| Abdelhamid 2018b (18)    | Polyunsaturated fat      | Intake + Supplements | Coronary heart disease           | Cardiovascular disease | Fatty acids              | 15          | 10,076      | No                            |
| Abdelhamid 2018b (18)    | Polyunsaturated fat      | Intake               | Major cardiovascular events      | Cardiovascular disease | Fatty acids              | 2           | 2,879       | No                            |
| Adler 2014 (2)           | Low-sodium               | Intake               | All-cause mortality              | All-cause mortality    | Micronutrients           | 7           | 6,603       | Yes                           |
| Adler 2014 (2)           | Low-sodium               | Intake               | Cardiovascular mortality         | Cardiovascular disease | Micronutrients           | 3           | 2,656       | Yes                           |
| Adler 2014 (2)           | Low-sodium               | Intake               | Cardiovascular disease           | Cardiovascular disease | Micronutrients           | 4           | 3,397       | Yes                           |
| Avenell 2014 (3)         | Vitamin D                | Supplements          | Hip fracture                     | Bone health            | Micronutrients           | 10          | 26,549      | No                            |
| Avenell 2014 (3)         | Vitamin D                | Supplements          | Any fracture                     | Bone health            | Micronutrients           | 14          | 27,127      | No                            |
| Bjelakovic 2012 (63)     | $\beta$ -carotene        | Supplements          | All-cause mortality              | All-cause mortality    | Micronutrients           | 31          | 195,503     | No                            |
| Bjelakovic 2012 (63)     | Vitamin E                | Supplements          | All-cause mortality              | All-cause mortality    | Micronutrients           | 64          | 211,957     | No                            |

|                       |                      |                      |                                     |                        |                  |    |        |    |
|-----------------------|----------------------|----------------------|-------------------------------------|------------------------|------------------|----|--------|----|
| Bjelakovic 2012 (63)  | Vitamin C            | Supplements          | All-cause mortality                 | All-cause mortality    | Micronutrients   | 41 | 90,191 | No |
| Bjelakovic 2012 (63)  | Vitamin A            | Supplements          | All-cause mortality                 | All-cause mortality    | Micronutrients   | 18 | 61,190 | No |
| Bjelakovic 2014a (59) | Vitamin D            | Supplements          | All-cause mortality                 | All-cause mortality    | Micronutrients   | 56 | 95,286 | No |
| Bjelakovic 2014a (59) | Vitamin D            | Supplements          | Cardiovascular mortality            | Cardiovascular disease | Micronutrients   | 10 | 47,267 | No |
| Bjelakovic 2014b (19) | Vitamin D            | Supplements          | Cancer                              | Cancer                 | Micronutrients   | 18 | 50,623 | No |
| Bjelakovic 2014b (19) | Vitamin D3           | Supplements          | Breast cancer                       | Cancer                 | Micronutrients   | 7  | 43,669 | No |
| Bjelakovic 2014b (19) | Vitamin D3           | Supplements          | Lung cancer                         | Cancer                 | Micronutrients   | 5  | 45,509 | No |
| De-Regil 2015 (64)    | Folate               | Supplements          | Neural tube defect                  | Pregnancy Outcomes     | Micronutrients   | 5  | 6,708  | No |
| De-Regil 2015 (64)    | Folate               | Supplements          | Congenital cardiovascular anomalies | Pregnancy Outcomes     | Micronutrients   | 3  | 5,612  | No |
| Hofmeyr 2018 (7)      | Calcium              | Supplements          | Pre-eclampsia                       | Pregnancy Outcomes     | Micronutrients   | 13 | 15,730 | No |
| Hofmeyr 2018 (7)      | Calcium              | Supplements          | High blood pressure                 | Pregnancy Outcomes     | Micronutrients   | 12 | 15,470 | No |
| Hooper 2012 (8)       | Low-fat/modified fat | Intake + Supplements | Cardiovascular mortality            | Cardiovascular disease | Dietary approach | 16 | 65,978 | No |
| Hooper 2012 (8)       | Low-fat/modified fat | Intake + Supplements | All-cause mortality                 | All-cause mortality    | Dietary approach | 21 | 71,790 | No |
| Hooper 2012 (8)       | Low-fat/modified fat | Intake + Supplements | Combined cardiovascular events      | Cardiovascular disease | Dietary approach | 23 | 65,508 | No |
| Hooper 2015b (20)     | Low saturated fat    | Intake               | All-cause mortality                 | All-cause mortality    | Fatty acids      | 12 | 55,858 | No |
| Hooper 2015b (20)     | Low saturated fat    | Intake               | Cardiovascular mortality            | Cardiovascular disease | Fatty acids      | 12 | 53,421 | No |
| Hooper 2015b (20)     | Low saturated fat    | Intake               | Combined cardiovascular events      | Cardiovascular disease | Fatty acids      | 13 | 53,300 | No |
| Hooper 2018 (9)       | Omega-6              | Intake + Supplements | Combined cardiovascular events      | Cardiovascular disease | Fatty acids      | 7  | 4,962  | No |
| Hooper 2018 (9)       | Omega-6              | Intake + Supplements | All-cause mortality                 | All-cause mortality    | Fatty acids      | 10 | 4,506  | No |

|                    |                |                      |                                |                        |                  |    |        |    |
|--------------------|----------------|----------------------|--------------------------------|------------------------|------------------|----|--------|----|
| Hooper 2018 (9)    | Omega-6        | Intake + Supplements | Cardiovascular mortality       | Cardiovascular disease | Fatty acids      | 7  | 4,019  | No |
| Keats 2019 (10)    | Micronutrients | Supplements          | Preterm birth                  | Pregnancy Outcomes     | Micronutrients   | 18 | 91,425 | No |
| Keats 2019 (10)    | Micronutrients | Supplements          | Low birth weight               | Pregnancy Outcomes     | Micronutrients   | 18 | 68,801 | No |
| Keats 2019 (10)    | Micronutrients | Supplements          | Small gestational age          | Pregnancy Outcomes     | Micronutrients   | 17 | 57,348 | No |
| Mathew 2012        | Vitamin E      | Supplements          | Cataract                       | Eye disease            | Micronutrients   | 3  | 55,721 | No |
| Palacios 2019 (17) | Vitamin D      | Supplements          | Gestational diabetes           | Pregnancy Outcomes     | Micronutrients   | 5  | 1,846  | No |
| Palacios 2019 (17) | Vitamin D      | Supplements          | Preterm birth                  | Pregnancy Outcomes     | Micronutrients   | 4  | 2,294  | No |
| Palacios 2019 (17) | Vitamin D      | Supplements          | Pre-eclampsia                  | Pregnancy Outcomes     | Micronutrients   | 5  | 1,553  | No |
| Rees 2013b (13)    | Selenium       | Supplements          | All-cause mortality            | All-cause mortality    | Micronutrients   | 2  | 18,452 | No |
| Rees 2013b (13)    | Selenium       | Supplements          | Cardiovascular mortality       | Cardiovascular disease | Micronutrients   | 2  | 18,452 | No |
| Rees 2013b (13)    | Selenium       | Supplements          | Combined cardiovascular events | Cardiovascular disease | Micronutrients   | 2  | 18,452 | No |
| Tieu 2017 (21)     | Healthy diet   | Intake               | Preterm birth                  | Pregnancy Outcomes     | Dietary approach | 3  | 1,149  | No |
| Tieu2017 (21)      | Healthy diet   | Intake               | Small gestational age          | Pregnancy Outcomes     | Dietary approach | 2  | 715    | No |
| Tieu 2017 (21)     | Healthy diet   | Intake               | Gestational diabetes           | Pregnancy Outcomes     | Dietary approach | 5  | 1,275  | No |
| Vinceti 2018 (62)  | Selenium       | Supplements          | Cancer                         | Cancer                 | Micronutrients   | 5  | 21,860 | No |
| Yao 2017 (16)      | Fibre          | Intake               | Colorectal cancer              | Cancer                 | Fibre            | 2  | 2,794  | No |
| Yao 2017 (16)      | Fibre          | Intake               | Colorectal adenoma             | Cancer                 | Fibre            | 5  | 3,641  | No |

**Table S11:** Characteristics of the included meta-analyses with continuous outcomes

| Author, Year (Reference) | Intervention category | Type of intake       | Outcome as defined by the author | Cluster of outcomes          | Cluster of interventions | n (studies) | Sample size | Conflict of interest (Yes/No) |
|--------------------------|-----------------------|----------------------|----------------------------------|------------------------------|--------------------------|-------------|-------------|-------------------------------|
| Abdelhamid 2018a (1)     | Omega-3               | Intake + Supplements | Body weight                      | Intermediate disease markers | Fatty acids              | 12          | 15,812      | No                            |
| Adler 2014 (2)           | Low-sodium            | Intake               | Diastolic blood pressure         | Intermediate disease markers | Micronutrients           | 5           | 2,754       | Yes                           |
| Adler 2014 (2)           | Low-sodium            | Intake               | Systolic blood pressure          | Intermediate disease markers | Micronutrients           | 6           | 3,362       | Yes                           |
| Cormick 2015 (4)         | Calcium               | Supplements          | Diastolic blood pressure         | Intermediate disease markers | Micronutrients           | 15          | 2,947       | No                            |
| Cormick 2015 (4)         | Calcium               | Supplements          | Systolic blood pressure          | Intermediate disease markers | Micronutrients           | 16          | 3,048       | No                            |
| Hartley 2013 (5)         | Fruit & Vegetables    | Intake               | Systolic blood pressure          | Intermediate disease markers | Food groups              | 2           | 891         | No                            |
| Hartley 2013 (5)         | Fruit & Vegetables    | Intake               | Diastolic blood pressure         | Intermediate disease markers | Food groups              | 2           | 891         | No                            |
| Hartley 2016 (6)         | Fibre                 | Intake + Supplements | Systolic blood pressure          | Intermediate disease markers | Fibre                    | 10          | 661         | Yes                           |
| Hartley 2016 (6)         | Fibre                 | Intake + Supplements | Diastolic blood pressure         | Intermediate disease markers | Fibre                    | 10          | 661         | Yes                           |
| Hooper 2012 (8)          | Low-fat               | Intake               | Body weight                      | Intermediate disease markers | Dietary approach         | 16          | 11,058      | No                            |
| Hooper 2015a (65)        | Low-fat               | Intake               | Body weight                      | Intermediate disease markers | Dietary approach         | 30          | 53,647      | No                            |
| Kelly 2017 (11)          | Whole grains          | Intake               | Body weight                      | Intermediate disease markers | Food groups              | 5           | 439         | No                            |
| Kelly 2017 (11)          | Whole grains          | Intake               | Systolic blood pressure          | Intermediate disease markers | Food groups              | 8           | 768         | No                            |
| Kelly 2017 (11)          | Whole grains          | Intake               | Diastolic blood pressure         | Intermediate disease markers | Food groups              | 8           | 768         | No                            |
| Palacios 2019 (17)       | Vitamin D             | Supplements          | Birth length                     | Pregnancy Outcomes           | Micronutrients           | 11          | 3,058       | No                            |
| Palacios 2019 (17)       | Vitamin D             | Supplements          | Birth weight                     | Pregnancy Outcomes           | Micronutrients           | 13          | 3,240       | No                            |
| Palacios 2019 (17)       | Vitamin D             | Supplements          | Head circumference at birth      | Pregnancy Outcomes           | Micronutrients           | 10          | 2,998       | No                            |

|                   |                    |                      |                          |                              |                  |    |       |     |
|-------------------|--------------------|----------------------|--------------------------|------------------------------|------------------|----|-------|-----|
| Rees 2013a (12)   | Healthy diet       | Intake               | Systolic blood pressure  | Intermediate disease markers | Dietary approach | 11 | 6,406 | No  |
| Rees 2013a (12)   | Healthy diet       | Intake               | Diastolic blood pressure | Intermediate disease markers | Dietary approach | 11 | 6,406 | No  |
| Rees 2019 (14)    | Mediterranean diet | Intake               | High Density Lipoprotein | Intermediate disease markers | Dietary approach | 7  | 891   | No  |
| Rees 2019 (14)    | Mediterranean diet | Intake               | Triglycerides            | Intermediate disease markers | Dietary approach | 8  | 939   | No  |
| Rees 2019 (14)    | Mediterranean diet | Intake               | Systolic blood pressure  | Intermediate disease markers | Dietary approach | 4  | 448   | No  |
| Tieu 2017 (21)    | Healthy diet       | Intake               | Birth weight             | Pregnancy Outcomes           | Dietary approach | 5  | 1,324 | No  |
| Usinger 2012 (15) | Fermented milk     | Intake + Supplements | Diastolic blood pressure | Intermediate disease markers | Food             | 15 | 1,232 | Yes |
| Usinger 2012 (15) | Fermented milk     | Intake + Supplements | Systolic blood pressure  | Intermediate disease markers | Food             | 15 | 1,232 | Yes |

**Table S12:** Meta-analyses with comparisons included in meta-epidemiologic study

| Author, Year<br>(Reference) | Intervention             | Outcome                     | Comparison possible for methodological trial characteristic? |                        |                                   |                                |                         |                     |                    |
|-----------------------------|--------------------------|-----------------------------|--------------------------------------------------------------|------------------------|-----------------------------------|--------------------------------|-------------------------|---------------------|--------------------|
|                             |                          |                             | random sequence                                              | allocation concealment | blinding participants / personnel | blinding of outcome assessment | incomplete outcome data | selective reporting | dietary compliance |
| Abdelhamid 2018a (1)        | Omega-3                  | Cardiovascular mortality    | yes                                                          | yes                    | yes                               | yes                            | yes                     | yes                 | yes                |
| Abdelhamid 2018a (1)        | Omega-3                  | Cardiovascular disease      | yes                                                          | yes                    | yes                               | yes                            | yes                     | yes                 | yes                |
| Abdelhamid 2018a (1)        | $\alpha$ -Linolenic acid | Cardiovascular disease      | yes                                                          | yes                    | yes                               | yes                            | no                      | no                  | yes                |
| Abdelhamid 2018a (1)        | Omega-3                  | Body weight                 | yes                                                          | yes                    | yes                               | yes                            | yes                     | yes                 | yes                |
| Abdelhamid 2018a (1)        | Omega-3                  | All-cause mortality         | yes                                                          | yes                    | yes                               | yes                            | yes                     | yes                 | yes                |
| Abdelhamid 2018a (1)        | $\alpha$ -Linolenic acid | Cardiovascular mortality    | yes                                                          | yes                    | no                                | no                             | no                      | no                  | yes                |
| Abdelhamid 2018a (1)        | $\alpha$ -Linolenic acid | Coronary heart disease      | yes                                                          | yes                    | yes                               | yes                            | no                      | no                  | yes                |
| Abdelhamid 2018b (18)       | Polyunsaturated fat      | All-cause mortality         | yes                                                          | yes                    | yes                               | yes                            | yes                     | yes                 | yes                |
| Abdelhamid 2018b (18)       | Polyunsaturated fat      | Coronary heart disease      | yes                                                          | yes                    | yes                               | yes                            | yes                     | no                  | yes                |
| Abdelhamid 2018b (18)       | Polyunsaturated fat      | Major cardiovascular events | no                                                           | no                     | yes                               | no                             | no                      | no                  | no                 |
| Adler 2014 (2)              | Low-sodium               | All-cause mortality         | yes                                                          | yes                    | yes                               | yes                            | yes                     | yes                 | yes                |
| Adler 2014 (2)              | Low-sodium               | Cardiovascular mortality    | yes                                                          | yes                    | yes                               | no                             | yes                     | no                  | no                 |
| Adler 2014 (2)              | Low-sodium               | Cardiovascular disease      | yes                                                          | yes                    | yes                               | no                             | yes                     | yes                 | no                 |
| Adler 2014 (2)              | Low-sodium               | Systolic blood pressure     | yes                                                          | yes                    | yes                               | no                             | yes                     | yes                 | no                 |
| Adler 2014 (2)              | Low-sodium               | Diastolic blood pressure    | yes                                                          | yes                    | yes                               | no                             | yes                     | yes                 | no                 |
| Avenell 2014 (3)            | Vitamin D                | Hip fracture                | yes                                                          | yes                    | n/a                               | n/a                            | n/a                     | n/a                 | n/a                |
| Avenell 2014 (3)            | Vitamin D                | Any fracture                | yes                                                          | yes                    | n/a                               | n/a                            | n/a                     | n/a                 | n/a                |
| Bjelakovic 2012 (63)        | $\beta$ -carotene        | All-cause mortality         | yes                                                          | yes                    | n/a                               | n/a                            | yes                     | yes                 | n/a                |
| Bjelakovic 2012 (63)        | Vitamin E                | All-cause mortality         | yes                                                          | yes                    | n/a                               | n/a                            | yes                     | yes                 | n/a                |
| Bjelakovic 2012 (63)        | Vitamin C                | All-cause mortality         | yes                                                          | yes                    | n/a                               | n/a                            | yes                     | yes                 | n/a                |
| Bjelakovic 2012 (63)        | Vitamin A                | All-cause mortality         | yes                                                          | yes                    | n/a                               | n/a                            | yes                     | no                  | n/a                |
| Bjelakovic 2014a (59)       | Vitamin D                | All-cause mortality         | yes                                                          | yes                    | n/a                               | n/a                            | yes                     | yes                 | n/a                |
| Bjelakovic 2014a (59)       | Vitamin D                | Cardiovascular mortality    | yes                                                          | yes                    | n/a                               | n/a                            | no                      | yes                 | n/a                |
| Bjelakovic 2014b (19)       | Vitamin D                | Cancer                      | yes                                                          | yes                    | yes                               | yes                            | yes                     | yes                 | n/a                |
| Bjelakovic 2014b (19)       | Vitamin D3               | Breast cancer               | no                                                           | no                     | yes                               | yes                            | yes                     | yes                 | n/a                |
| Bjelakovic 2014b (19)       | Vitamin D3               | Lung cancer                 | no                                                           | no                     | yes                               | yes                            | yes                     | yes                 | n/a                |

|                    |                      |                                     |     |     |     |     |     |     |     |
|--------------------|----------------------|-------------------------------------|-----|-----|-----|-----|-----|-----|-----|
| Cormick 2015 (4)   | Calcium              | Systolic blood pressure             | yes | yes | yes | yes | yes | no  | n/a |
| Cormick 2015 (4)   | Calcium              | Diastolic blood pressure            | yes | yes | yes | yes | yes | no  | n/a |
| De-Regil 2015 (64) | Folate               | Neural tube defect                  | yes | yes | n/a | n/a | no  | no  | n/a |
| De-Regil 2015 (64) | Folate               | Congenital cardiovascular anomalies | yes | yes | n/a | n/a | no  | no  | n/a |
| Hartley 2013 (5)   | Fruit & Vegetables   | Systolic blood pressure             | yes | no  | no  | yes | no  | no  | n/a |
| Hartley 2013 (5)   | Fruit & Vegetables   | Diastolic blood pressure            | yes | no  | no  | yes | no  | no  | n/a |
| Hartley 2016 (6)   | Fibre                | Systolic blood pressure             | yes | yes | yes | yes | yes | no  | n/a |
| Hartley 2016 (6)   | Fibre                | Diastolic blood pressure            | yes | yes | yes | yes | yes | no  | n/a |
| Hofmeyr 2018 (7)   | Calcium              | Pre-eclampsia                       | yes | yes | yes | yes | yes | yes | n/a |
| Hofmeyr 2018 (7)   | Calcium              | High blood pressure                 | yes | yes | yes | yes | yes | yes | n/a |
| Hooper 2012 (8)    | Low-fat/modified fat | Cardiovascular mortality            | yes | yes | n/a | n/a | yes | no  | n/a |
| Hooper 2012 (8)    | Low-fat/modified fat | All-cause mortality                 | yes | yes | n/a | n/a | yes | no  | n/a |
| Hooper 2012 (8)    | Low-fat/modified fat | Combined cardiovascular events      | yes | yes | n/a | n/a | yes | no  | n/a |
| Hooper 2012 (8)    | Low-fat              | Body weight                         | no  | yes | n/a | n/a | yes | no  | n/a |
| Hooper 2015a (65)  | Low-fat              | Body weight                         | yes | yes | n/a | n/a | yes | yes | n/a |
| Hooper 2015b (20)  | Low saturated fat    | All-cause mortality                 | no  | yes | n/a | n/a | yes | no  | yes |
| Hooper 2015b (20)  | Low saturated fat    | Cardiovascular mortality            | no  | yes | n/a | n/a | yes | no  | yes |
| Hooper 2015b (20)  | Low saturated fat    | Combined cardiovascular events      | no  | yes | n/a | n/a | yes | no  | yes |
| Hooper 2018 (9)    | Omega-6              | Combined cardiovascular events      | yes | yes | yes | yes | yes | no  | yes |
| Hooper 2018 (9)    | Omega-6              | All-cause mortality                 | yes | yes | yes | yes | yes | no  | yes |
| Hooper 2018 (9)    | Omega-6              | Cardiovascular mortality            | yes | yes | yes | yes | yes | yes | yes |
| Keats 2019 (10)    | Micronutrients       | Preterm birth                       | yes | yes | yes | yes | yes | no  | n/a |
| Keats 2019 (10)    | Micronutrients       | Low birth weight                    | yes | yes | yes | yes | yes | no  | n/a |
| Keats 2019 (10)    | Micronutrients       | Small gestational age               | yes | yes | yes | yes | yes | no  | n/a |
| Kelly 2017 (11)    | Whole grains         | Systolic blood pressure             | yes | yes | n/a | yes | yes | yes | n/a |
| Kelly 2017 (11)    | Whole grains         | Diastolic blood pressure            | yes | yes | n/a | yes | yes | yes | n/a |
| Kelly 2017 (11)    | Whole grains         | Body weight                         | yes | yes | n/a | yes | yes | no  | n/a |
| Mathew 2012 (60)   | Vitamin E            | Cataract                            | no  | no  | n/a | n/a | yes | no  | n/a |

|                    |                    |                                |     |     |     |     |     |     |     |
|--------------------|--------------------|--------------------------------|-----|-----|-----|-----|-----|-----|-----|
| Palacios 2019 (17) | Vitamin D          | Gestational diabetes           | no  | yes | yes | yes | yes | yes | n/a |
| Palacios 2019 (17) | Vitamin D          | Preterm birth                  | no  | yes | yes | yes | yes | yes | n/a |
| Palacios 2019 (17) | Vitamin D          | Birth length                   | no  | yes | yes | yes | yes | yes | n/a |
| Palacios 2019 (17) | Vitamin D          | Birth weight                   | yes | yes | yes | yes | yes | yes | n/a |
| Palacios 2019 (17) | Vitamin D          | Head circumference at birth    | no  | yes | yes | yes | yes | yes | n/a |
| Palacios 2019 (17) | Vitamin D          | Pre-eclampsia                  | no  | yes | yes | yes | yes | yes | n/a |
| Rees 2013a (12)    | Healthy diet       | Systolic blood pressure        | yes | yes | no  | yes | yes | no  | n/a |
| Rees 2013a (12)    | Healthy diet       | Diastolic blood pressure       | yes | yes | no  | yes | yes | no  | n/a |
| Rees 2013b (13)    | Selenium           | All-cause mortality            | yes | yes | yes | yes | no  | no  | n/a |
| Rees 2013b (13)    | Selenium           | Cardiovascular mortality       | yes | yes | yes | yes | no  | no  | n/a |
| Rees 2013b (13)    | Selenium           | Combined cardiovascular events | yes | yes | yes | yes | no  | no  | n/a |
| Rees 2019 (14)     | Mediterranean diet | High Density Lipoprotein       | yes | yes | no  | yes | yes | no  | n/a |
| Rees 2019 (14)     | Mediterranean diet | Triglycerides                  | yes | yes | no  | yes | yes | no  | n/a |
| Rees 2019 (14)     | Mediterranean diet | Systolic blood pressure        | yes | yes | no  | yes | yes | yes | n/a |
| Tieu 2017 (21)     | Healthy diet       | Preterm birth                  | no  | no  | no  | no  | yes | yes | n/a |
| Tieu 2017 (21)     | Healthy diet       | Small gestational age          | no  | no  | no  | yes | yes | yes | n/a |
| Tieu 2017 (21)     | Healthy diet       | Birth weight                   | no  | yes | no  | yes | yes | yes | n/a |
| Tieu 2017 (21)     | Healthy diet       | Gestational diabetes           | no  | yes | no  | yes | yes | yes | n/a |
| Usinger 2012 (15)  | Fermented milk     | Systolic blood pressure        | yes | yes | n/a | n/a | yes | yes | n/a |
| Usinger 2012 (15)  | Fermented milk     | Diastolic blood pressure       | yes | yes | n/a | n/a | yes | yes | n/a |
| Vinceti 2018 (62)  | Selenium           | Cancer                         | yes | yes | n/a | n/a | n/a | no  | n/a |
| Yao 2017 (16)      | Fibre              | Colorectal cancer              | yes | yes | no  | no  | no  | no  | n/a |
| Yao 2017 (16)      | Fibre              | Colorectal adenoma             | yes | yes | yes | yes | no  | no  | n/a |

n/a: not applicable

**Table S13:** Multivariable meta-regression for sample size and conflicts of interest across pairs with binary outcome within the methodological trial characteristic random sequence

| Variable                   | Estimate | 95% CI     |
|----------------------------|----------|------------|
| Intercept                  | 1.01     | 0.94; 1.09 |
| Sample Size                | 1.00     | 0.99; 1.00 |
| Conflict of Interest (yes) | 0.95     | 0.65; 1.40 |

CI=confidence interval

**Table S14:** Multivariable meta-regression for sample size and conflicts of interest across pairs with binary outcome within the methodological trial characteristic allocation concealment

| Variable                   | Estimate | 95% CI     |
|----------------------------|----------|------------|
| Intercept                  | 1.04     | 0.98; 1.12 |
| Sample Size                | 1.00     | 0.99; 1.00 |
| Conflict of Interest (yes) | 1.04     | 0.69; 1.57 |

**Table S15:** Multivariable meta-regression for sample size and conflicts of interest across pairs with binary outcome within the methodological trial characteristic blinding of participants and personnel

| Variable                   | Estimate | 95% CI     |
|----------------------------|----------|------------|
| Intercept                  | 0.96     | 0.86; 1.06 |
| Sample Size                | 1.00     | 0.99; 1.00 |
| Conflict of Interest (yes) | 1.24     | 0.78; 1.95 |

**Table S16:** Multivariable meta-regression for sample size and conflicts of interest across pairs with binary outcome within the methodological trial characteristic blinding of outcome assessment

| Variable                   | Estimate | 95% CI     |
|----------------------------|----------|------------|
| Intercept                  | 0.74     | 0.59; 0.92 |
| Sample Size                | 1.00     | 0.99; 1.00 |
| Conflict of Interest (yes) | 1.38     | 0.08; 23.1 |

**Table S17:** Multivariable meta-regression for sample size and conflicts of interest across pairs with binary outcome within the methodological trial characteristic Incomplete outcome data

| Variable                   | Estimate | 95% CI      |
|----------------------------|----------|-------------|
| Intercept                  | 0.9      | 0.82; 0.998 |
| Sample Size                | 1.00     | 0.99; 1.00  |
| Conflict of Interest (yes) | 1.47     | 0.89; 2.44  |

**Table S18:** Multivariable meta-regression for sample size and conflicts of interest across pairs with binary outcome within the methodological trial characteristic Selective reporting

| Variable                   | Estimate | 95% CI     |
|----------------------------|----------|------------|
| Intercept                  | 1.28     | 1.06; 1.54 |
| Sample Size                | 0.99     | 0.99; 1.00 |
| Conflict of Interest (yes) | 0.90     | 0.58; 1.41 |

**Table S19:** Multivariable meta-regression for sample size and conflicts of interest across pairs with binary outcome within the methodological trial characteristic Dietary compliance

| Variable                   | Estimate | 95% CI     |
|----------------------------|----------|------------|
| Intercept                  | 0.92     | 0.80; 1.05 |
| Sample Size                | 1.00     | 0.99; 1.00 |
| Conflict of Interest (yes) | 1.36     | 0.79; 2.34 |

**Table S20:** Multivariable meta-regression for sample size and conflicts of interest across pairs with continuous outcome within the methodological trial characteristic: random sequence

| Variable                   | Estimate | 95% CI      |
|----------------------------|----------|-------------|
| Intercept                  | 0.05     | -0.07; 0.17 |
| Sample Size                | 0.00     | 0.00; 0.00  |
| Conflict of Interest (yes) | -0.08    | -0.31; 0.15 |

**Table S21:** Multivariable meta-regression for sample size and conflicts of interest across pairs with continuous outcome within the methodological trial characteristic: allocation concealment

| Variable                   | Estimate | 95% CI      |
|----------------------------|----------|-------------|
| Intercept                  | 0.07     | 0.00; 0.15  |
| Sample Size                | 0.00     | 0.00; 0.00  |
| Conflict of Interest (yes) | -0.05    | -0.28; 0.19 |

**Table S22:** Multivariable meta-regression for sample size and conflicts of interest across pairs within the methodological trial characteristic: blinding of participants and personnel

| Variable                   | Estimate | 95% CI      |
|----------------------------|----------|-------------|
| Intercept                  | -0.08    | -0.23; 0.07 |
| Sample Size                | 0.00     | 0.00; 0.00  |
| Conflict of Interest (yes) | -0.17    | -0.38; 0.05 |

**Table S23:** Multivariable meta-regression for sample size and conflicts of interest across pairs within the methodological trial characteristic: blinding of outcome assessment

| Variable                   | Estimate | 95% CI      |
|----------------------------|----------|-------------|
| Intercept                  | 0.01     | -0.13; 0.15 |
| Sample Size                | 0.00     | 0.00; 0.00  |
| Conflict of Interest (yes) | 0.10     | -0.11; 0.32 |

**Table S24:** Multivariable meta-regression for sample size and conflicts of interest across pairs within the methodological trial characteristic: Incomplete outcome data

| Variable                   | Estimate | 95% CI      |
|----------------------------|----------|-------------|
| Intercept                  | -0.03    | -0.16; 0.10 |
| Sample Size                | 0.00     | 0.00; 0.00  |
| Conflict of Interest (yes) | -0.16    | -0.43; 0.11 |

**Table S25:** Multivariable meta-regression for sample size and conflicts of interest across pairs within the methodological trial characteristic: Selective reporting

| Variable                   | Estimate | 95% CI      |
|----------------------------|----------|-------------|
| Intercept                  | -0.09    | -0.20; 0.02 |
| Sample Size                | 0.00     | 0.00; 0.00  |
| Conflict of Interest (yes) | -0.04    | -0.21; 0.12 |

**Table S26:** Definition of dietary compliance in the included Cochrane reviews

| Reference             | Definition of compliance                                                                                                                                                                                                                                                                                                                                                                                                                                                                                                                                                                                                                                                                                                                                                                                                                                                                                          |
|-----------------------|-------------------------------------------------------------------------------------------------------------------------------------------------------------------------------------------------------------------------------------------------------------------------------------------------------------------------------------------------------------------------------------------------------------------------------------------------------------------------------------------------------------------------------------------------------------------------------------------------------------------------------------------------------------------------------------------------------------------------------------------------------------------------------------------------------------------------------------------------------------------------------------------------------------------|
| Abdelhamid 2018a (1)  | <p>Other sources of bias: limited compliance</p> <ul style="list-style-type: none"> <li>○ <i>Criteria for low risk of bias:</i> “The study authors needed to have reported on the level of compliance in all arms in sufficient detail to determine whether the study results were robust. We followed a flow chart to make this determination. A statistically significant difference between the intervention and control groups in a body measure of at least 50% of the text fatty acids. Where no body measures were reported then estimated compliance needed to be greater than 64% (proportion complying multiplied by compliance threshold).”</li> <li>○ <i>Criteria for unclear:</i> “Compliance not reported or not in a way that could be interpreted.”</li> <li>○ <i>Criteria for high risk of bias:</i> “Measures of compliance were reported but fell below the appropriate thresholds”</li> </ul> |
| Abdelhamid 2018b (18) | <p>Risk of bias domain 8. Compliance</p> <p>“to be assessed as at low risk of bias regarding compliance, the higher PUFA arm had to demonstrate an increase in PUFA over control in a body biomarker (total PUFA had to be assessed by at least linoleic acid plus one or more further components of PUFA), or greater reduction in total cholesterol in the higher PUFA arm. Where lipid biomarker and total cholesterol contradicted each other we chose unclear.”</p>                                                                                                                                                                                                                                                                                                                                                                                                                                          |
| Adler 2014(2)         | <p>No details on assessment of compliance provided in the methods section. Item labelled as “Assessment of compliance?”</p>                                                                                                                                                                                                                                                                                                                                                                                                                                                                                                                                                                                                                                                                                                                                                                                       |
| Hooper 2015b (20)     | <p>Other potential sources of bias: Achieving SFA reduction</p> <p>Assessment of SFA intake during the study period</p>                                                                                                                                                                                                                                                                                                                                                                                                                                                                                                                                                                                                                                                                                                                                                                                           |
| Hooper 2018 (9)       | <p>Risk of bias domain 8. Compliance bias</p> <p>“we considered studies to be at low risk of compliance bias when they assessed and clearly reported compliance for both intervention and control arms, and where most participants appeared to have taken at least 64% of the intended PUFA dose”</p>                                                                                                                                                                                                                                                                                                                                                                                                                                                                                                                                                                                                            |

PUFA: polyunsaturated fatty acids; SFA: saturated fatty acids

## Supplementary References

1. Abdelhamid AS, Brown TJ, Brainard JS, Biswas P, Thorpe GC, Moore HJ, et al. Omega-3 fatty acids for the primary and secondary prevention of cardiovascular disease. *Cochrane Database Syst Rev.* 2018(11):CD003177.
2. Adler AJ, Taylor F, Martin N, Gottlieb S, Taylor RS, Ebrahim S. Reduced dietary salt for the prevention of cardiovascular disease. *Cochrane Database Syst Rev.* 2014(12):CD009217.
3. Avenell A, Mak JC, O'Connell D. Vitamin D and vitamin D analogues for preventing fractures in post-menopausal women and older men. *Cochrane Database Syst Rev.* 2014(4):CD000227.
4. Cormick G, Ciapponi A, Cafferata ML, Belizan JM. Calcium supplementation for prevention of primary hypertension. *Cochrane Database Syst Rev.* 2015(6):CD010037.
5. Hartley L, Igbinedion E, Holmes J, Flowers N, Thorogood M, Clarke A, et al. Increased consumption of fruit and vegetables for the primary prevention of cardiovascular diseases. *Cochrane Database Syst Rev.* 2013(6):CD009874.
6. Hartley L, May MD, Loveman E, Colquitt JL, Rees K. Dietary fibre for the primary prevention of cardiovascular disease. *Cochrane Database Syst Rev.* 2016(1):CD011472.
7. Hofmeyr GJ, Lawrie TA, Atallah AN, Torloni MR. Calcium supplementation during pregnancy for preventing hypertensive disorders and related problems. *Cochrane Database Syst Rev.* 2018(10):CD001059.
8. Hooper L, Summerbell CD, Thompson R, Sills D, Roberts FG, Moore HJ, et al. Reduced or modified dietary fat for preventing cardiovascular disease. *Cochrane Database Syst Rev.* 2012(5):CD002137.
9. Hooper L, Al-Khudairy L, Abdelhamid AS, Rees K, Brainard JS, Brown TJ, et al. Omega-6 fats for the primary and secondary prevention of cardiovascular disease. *Cochrane Database Syst Rev.* 2018(11):CD011094.
10. Keats EC, Haider BA, Tam E, Bhutta ZA. Multiple-micronutrient supplementation for women during pregnancy. *Cochrane Database Syst Rev.* 2019(3):CD004905.
11. Kelly SA, Hartley L, Loveman E, Colquitt JL, Jones HM, Al-Khudairy L, et al. Whole grain cereals for the primary or secondary prevention of cardiovascular disease. *Cochrane Database Syst Rev.* 2017(8):CD005051.
12. Rees K, Dyakova M, Wilson N, Ward K, Thorogood M, Brunner E. Dietary advice for reducing cardiovascular risk. *Cochrane Database Syst Rev.* 2013(12):CD002128.
13. Rees K, Hartley L, Day C, Flowers N, Clarke A, Stranges S. Selenium supplementation for the primary prevention of cardiovascular disease. *Cochrane Database Syst Rev.* 2013(1):CD009671.
14. Rees K, Takeda A, Martin N, Ellis L, Wijesekara D, Vepa A, et al. Mediterranean-style diet for the primary and secondary prevention of cardiovascular disease. *Cochrane Database Syst Rev.* 2019(3):CD009825.
15. Usinger L, Reimer C, Ibsen H. Fermented milk for hypertension. *Cochrane Database Syst Rev.* 2012(4):CD008118.
16. Yao Y, Suo T, Andersson R, Cao Y, Wang C, Lu J, et al. Dietary fibre for the prevention of recurrent colorectal adenomas and carcinomas. *Cochrane Database Syst Rev.* 2017(1):CD003430.
17. Palacios C, Trak-Fellermeier MA, Martinez RX, Lopez-Perez L, Lips P, Salisi JA, et al. Regimens of vitamin D supplementation for women during pregnancy. *Cochrane Database Syst Rev.* 2019(10):CD013446.

18. Abdelhamid AS, Martin N, Bridges C, Brainard JS, Wang X, Brown TJ, et al. Polyunsaturated fatty acids for the primary and secondary prevention of cardiovascular disease. *Cochrane Database Syst Rev.* 2018(11):CD012345.
19. Bjelakovic G, Gluud LL, Nikolova D, Whitfield K, Krstic G, Wetterslev J, et al. Vitamin D supplementation for prevention of cancer in adults. *Cochrane Database Syst Rev.* 2014(6):CD007469.
20. Hooper L, Martin N, Abdelhamid A, Davey Smith G. Reduction in saturated fat intake for cardiovascular disease. *Cochrane Database Syst Rev.* 2015(6):CD011737.
21. Tieu J, Shepherd E, Middleton P, Crowther CA. Dietary advice interventions in pregnancy for preventing gestational diabetes mellitus. *Cochrane Database Syst Rev.* 2017(1):CD006674.
22. Balogun OO, da Silva Lopes K, Ota E, Takemoto Y, Rumbold A, Takegata M, et al. Vitamin supplementation for preventing miscarriage. *Cochrane Database Syst Rev.* 2016(5):CD004073.
23. Buppasiri P, Lumbiganon P, Thinkhamrop J, Ngamjarus C, Laopaiboon M, Medley N. Calcium supplementation (other than for preventing or treating hypertension) for improving pregnancy and infant outcomes. *Cochrane Database Syst Rev.* 2015(2):CD007079.
24. Evans JR, Lawrenson JG. Antioxidant vitamin and mineral supplements for preventing age-related macular degeneration. *Cochrane Database Syst Rev.* 2017(7):CD000253.
25. Harding KB, Peña-Rosas JP, Webster AC, Yap CM, Payne BA, Ota E, et al. Iodine supplementation for women during the preconception, pregnancy and postpartum period. *Cochrane Database Syst Rev.* 2017(3):CD011761.
26. Hemilä H, Louhiala P. Vitamin C for preventing and treating pneumonia. *Cochrane Database Syst Rev.* 2013(8):CD005532.
27. Imdad A, Ahmed Z, Bhutta ZA. Vitamin A supplementation for the prevention of morbidity and mortality in infants one to six months of age. *Cochrane Database Syst Rev.* 2016(9):CD007480.
28. Imdad A, Mayo-Wilson E, Herzer K, Bhutta ZA. Vitamin A supplementation for preventing morbidity and mortality in children from six months to five years of age. *Cochrane Database Syst Rev.* 2017(3):CD008524.
29. Lassi ZS, Moin A, Bhutta ZA. Zinc supplementation for the prevention of pneumonia in children aged 2 months to 59 months. *Cochrane Database Syst Rev.* 2016(12):CD005978.
30. Martí-Carvajal AJ, Solà I, Lathyris D, Dayer M. Homocysteine-lowering interventions for preventing cardiovascular events. *Cochrane Database Syst Rev.* 2017(8):CD006612.
31. Mayo-Wilson E, Junior JA, Imdad A, Dean S, Chan XH, Chan ES, et al. Zinc supplementation for preventing mortality, morbidity, and growth failure in children aged 6 months to 12 years of age. *Cochrane Database Syst Rev.* 2014(5):CD009384.
32. Oliveira JM, Allert R, East CE. Vitamin A supplementation for postpartum women. *Cochrane Database Syst Rev.* 2016(3):CD005944.
33. Salam RA, Zuberi NF, Bhutta ZA. Pyridoxine (vitamin B6) supplementation during pregnancy or labour for maternal and neonatal outcomes. *Cochrane Database Syst Rev.* 2015(6):CD000179.
34. Schwenger EM, Tejani AM, Loewen PS. Probiotics for preventing urinary tract infections in adults and children. *Cochrane Database Syst Rev.* 2015(12):CD008772.
35. Suchdev PS, Peña-Rosas JP, De-Regil LM. Multiple micronutrient powders for home (point-of-use) fortification of foods in pregnant women. *Cochrane Database Syst Rev.* 2015(6):CD011158.
36. Barrett HL, Dekker Nitert M, Conwell LS, Callaway LK. Probiotics for preventing gestational diabetes. *Cochrane Database Syst Rev.* 2014(2):CD009951.

37. Chen N, Yang M, Zhou M, Xiao J, Guo J, He L. L-carnitine for cognitive enhancement in people without cognitive impairment. *Cochrane Database Syst Rev.* 2017(3):CD009374.
38. Crawford TJ, Crowther CA, Alsweiler J, Brown J. Antenatal dietary supplementation with myo-inositol in women during pregnancy for preventing gestational diabetes. *Cochrane Database Syst Rev.* 2015(12):CD011507.
39. Evans JR, Lawrenson JG. Antioxidant vitamin and mineral supplements for slowing the progression of age-related macular degeneration. *Cochrane Database Syst Rev.* 2017(7):CD000254.
40. Graudal NA, Hubeck-Graudal T, Jurgens G. Effects of low sodium diet versus high sodium diet on blood pressure, renin, aldosterone, catecholamines, cholesterol, and triglyceride. *Cochrane Database Syst Rev.* 2017(4):CD004022.
41. Hartley L, Clar C, Ghannam O, Flowers N, Stranges S, Rees K. Vitamin K for the primary prevention of cardiovascular disease. *Cochrane Database Syst Rev.* 2015(9):CD011148.
42. He FJ, Li J, MacGregor GA. Effect of longer-term modest salt reduction on blood pressure. *Cochrane Database Syst Rev.* 2013(4):CD004937.
43. Makrides M, Crosby DD, Bain E, Crowther CA. Magnesium supplementation in pregnancy. *Cochrane Database Syst Rev.* 2014(4):CD000937.
44. Martin N, Germanò R, Hartley L, Adler AJ, Rees K. Nut consumption for the primary prevention of cardiovascular disease. *Cochrane Database Syst Rev.* 2015(9):CD011583.
45. Middleton P, Gomersall JC, Gould JF, Shepherd E, Olsen SF, Makrides M. Omega-3 fatty acid addition during pregnancy. *Cochrane Database Syst Rev.* 2018(11):CD003402.
46. Muktabhant B, Lawrie TA, Lumbiganon P, Laopaiboon M. Diet or exercise, or both, for preventing excessive weight gain in pregnancy. *Cochrane Database Syst Rev.* 2015(6):CD007145.
47. Lawrenson JG, Evans JR. Omega 3 fatty acids for preventing or slowing the progression of age-related macular degeneration. *Cochrane Database Syst Rev.* 2015(4):CD010015.
48. Low MS, Speedy J, Styles CE, De-Regil LM, Pasricha SR. Daily iron supplementation for improving anaemia, iron status and health in menstruating women. *Cochrane Database Syst Rev.* 2016(4):CD009747.
49. Ota E, Mori R, Middleton P, Tobe-Gai R, Mahomed K, Miyazaki C, et al. Zinc supplementation for improving pregnancy and infant outcome. *Cochrane Database Syst Rev.* 2015(2):CD000230.
50. Peña-Rosas JP, De-Regil LM, Garcia-Casal MN, Dowswell T. Daily oral iron supplementation during pregnancy. *Cochrane Database Syst Rev.* 2015(7):CD004736.
51. Ried K, Sullivan TR, Fakler P, Frank OR, Stocks NP. Effect of cocoa on blood pressure. *Cochrane Database Syst Rev.* 2012(8):CD008893.
52. Rumbold A, Ota E, Nagata C, Shahrook S, Crowther CA. Vitamin C supplementation in pregnancy. *Cochrane Database Syst Rev.* 2015(9):CD004072.
53. Shepherd E, Gomersall JC, Tieu J, Han S, Crowther CA, Middleton P. Combined diet and exercise interventions for preventing gestational diabetes mellitus. *Cochrane Database Syst Rev.* 2017(11):CD010443.
54. Al-Khudairy L, Flowers N, Wheelhouse R, Ghannam O, Hartley L, Stranges S, et al. Vitamin C supplementation for the primary prevention of cardiovascular disease. *Cochrane Database Syst Rev.* 2017(3):CD011114.
55. El Dib R, Gameiro OL, Ogata MS, Modolo NS, Braz LG, Jorge EC, et al. Zinc supplementation for the prevention of type 2 diabetes mellitus in adults with insulin resistance. *Cochrane Database Syst Rev.* 2015(5):CD005525.

56. Hemmingsen B, Gimenez-Perez G, Mauricio D, Roque IFM, Metzendorf MI, Richter B. Diet, physical activity or both for prevention or delay of type 2 diabetes mellitus and its associated complications in people at increased risk of developing type 2 diabetes mellitus. *Cochrane Database Syst Rev.* 2017(12):CD003054.
57. Jin H, Leng Q, Li C. Dietary flavonoid for preventing colorectal neoplasms. *Cochrane Database Syst Rev.* 2012(8):CD009350.
58. Rutjes AW, Denton DA, Di Nisio M, Chong LY, Abraham RP, Al-Assaf AS, et al. Vitamin and mineral supplementation for maintaining cognitive function in cognitively healthy people in mid and late life. *Cochrane Database Syst Rev.* 2018(12):CD011906.
59. Bjelakovic G, Gluud LL, Nikolova D, Whitfield K, Wetterslev J, Simonetti RG, et al. Vitamin D supplementation for prevention of mortality in adults. *Cochrane Database Syst Rev.* 2014(1):CD007470.
60. Mathew MC, Ervin AM, Tao J, Davis RM. Antioxidant vitamin supplementation for preventing and slowing the progression of age-related cataract. *Cochrane Database Syst Rev.* 2012(6):CD004567.
61. Sydenham E, Dangour AD, Lim WS. Omega 3 fatty acid for the prevention of cognitive decline and dementia. *Cochrane Database Syst Rev.* 2012(6):CD005379.
62. Vinceti M, Filippini T, Del Giovane C, Dennert G, Zwahlen M, Brinkman M, et al. Selenium for preventing cancer. *Cochrane Database Syst Rev.* 2018(1):CD005195.
63. Bjelakovic G, Nikolova D, Gluud LL, Simonetti RG, Gluud C. Antioxidant supplements for prevention of mortality in healthy participants and patients with various diseases. *Cochrane Database Syst Rev.* 2012(3):CD007176.
64. De-Regil LM, Pena-Rosas JP, Fernandez-Gaxiola AC, Rayco-Solon P. Effects and safety of periconceptional oral folate supplementation for preventing birth defects. *Cochrane Database Syst Rev.* 2015(12):CD007950.
65. Hooper L, Abdelhamid A, Bunn D, Brown T, Summerbell CD, Skeaff CM. Effects of total fat intake on body weight. *Cochrane Database Syst Rev.* 2015(8):CD011834.
